# Supplementary material for: Sulphuric acid immobilized on silica gel (H2SO4–SiO2) as an eco-friendly catalyst for transamidation
Source: Royal Society of Chemistry journal article supplement (doi:10.1039/c4ra16571c), 2015-01-01

## Electronic Supplementary Information (ESI)

### Sulphuric acid immobilized on silica gel (H<sub>2</sub>SO<sub>4</sub>-SiO<sub>2</sub>) as an eco-friendly catalyst for transamidation

Sk. Rasheed,<sup>a,b</sup> D. Nageswar Rao, <sup>a,b</sup> A. Siva Reddy, <sup>a,b</sup> Ravi Shankar,<sup>b</sup> and Parthasarathi Das <sup>a,b,\*</sup>

<sup>a</sup>Academy of Scientific and Innovative Research (AcSIR); <sup>b</sup>Medicinal Chemistry Division, Indian Institute of Integrative Medicine(CSIR) Canal Road, Jammu-180001, J & K, India; E-mail: [partha@iiim.ac.in](mailto:partha@iiim.ac.in)

#### Table of contents

The<sup>1</sup>H and <sup>13</sup>C NMR spectra of compounds

Page 1-42

#### *N*-(*p*-Tolyl)benzamide(1a): H<sup>1</sup> NMR & C<sup>13</sup> NMR

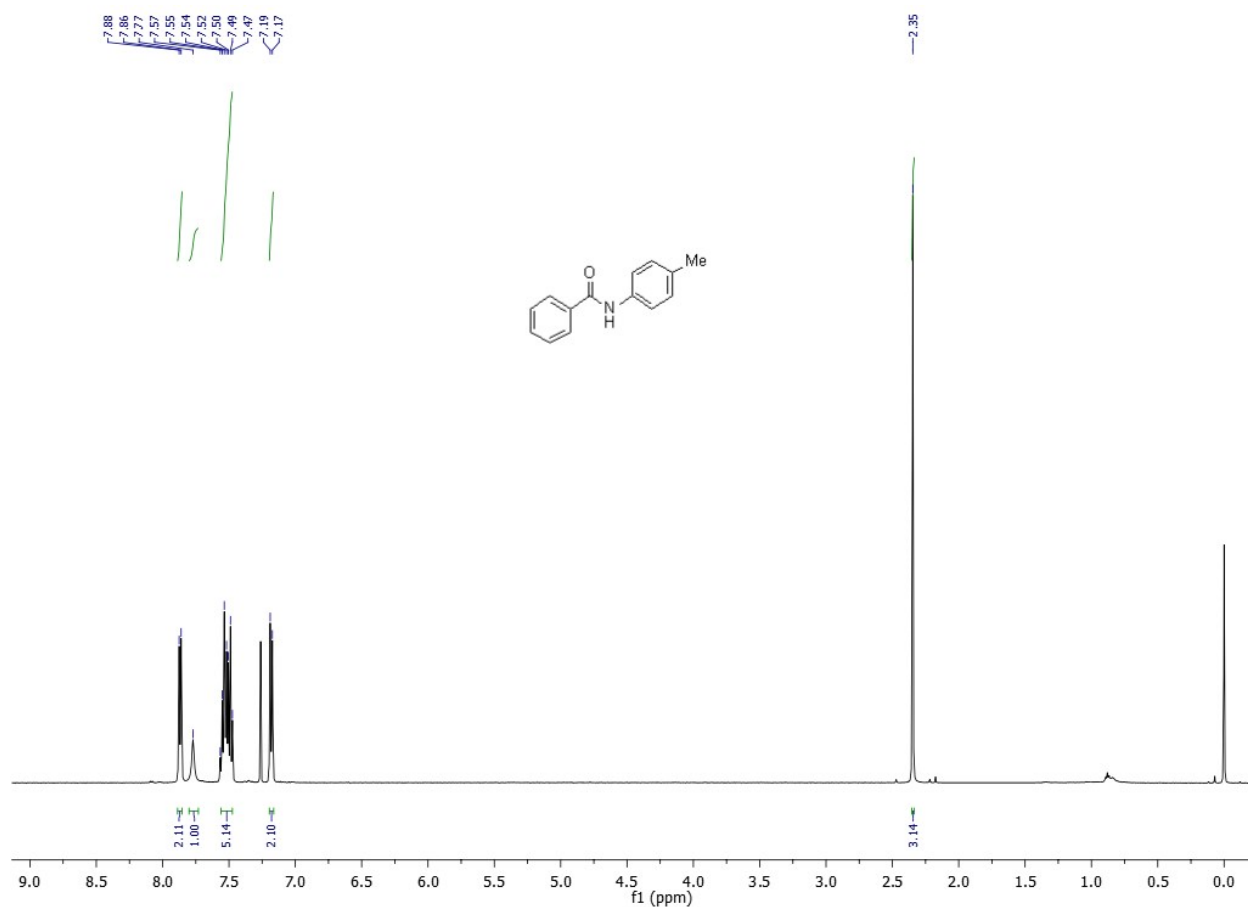

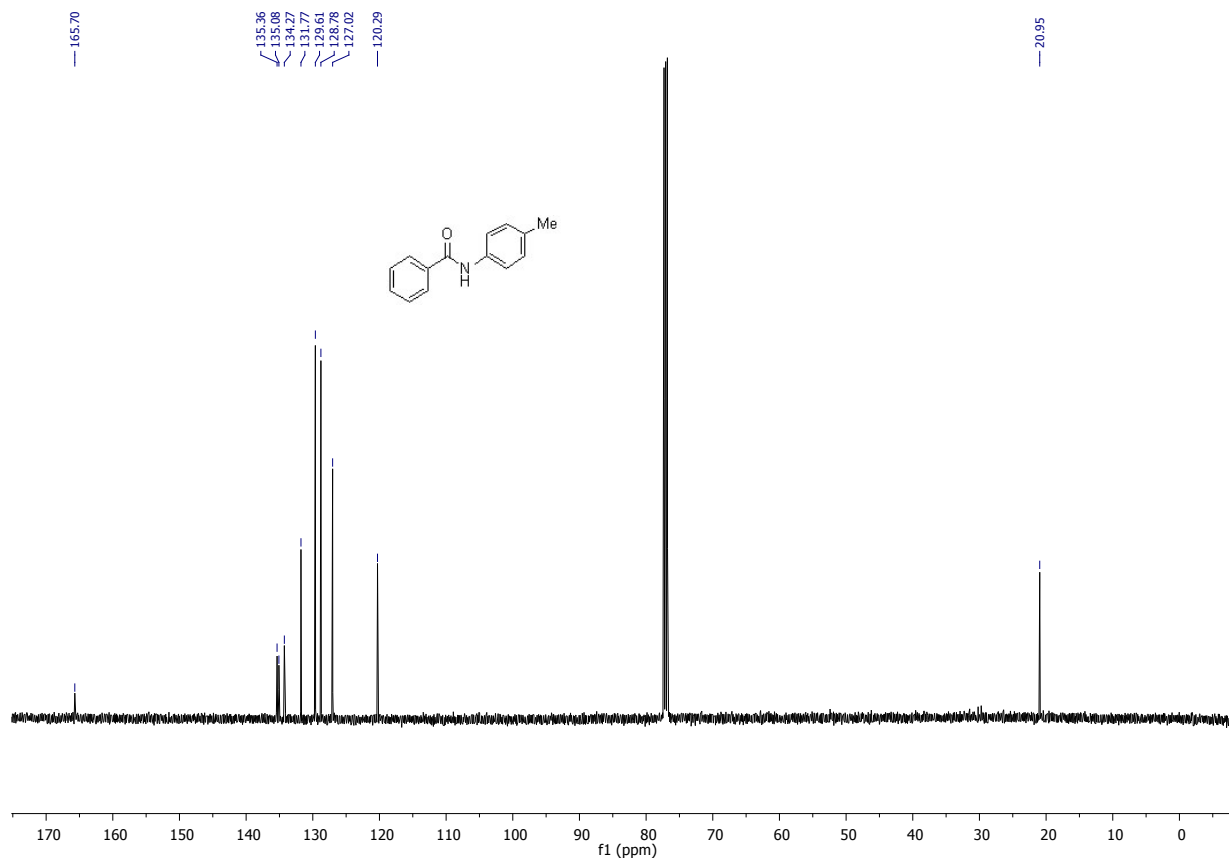

**Methyl 4-(3-methoxybenzamido)benzoate(1b):  $H^1$  NMR &  $C^{13}$  NMR**

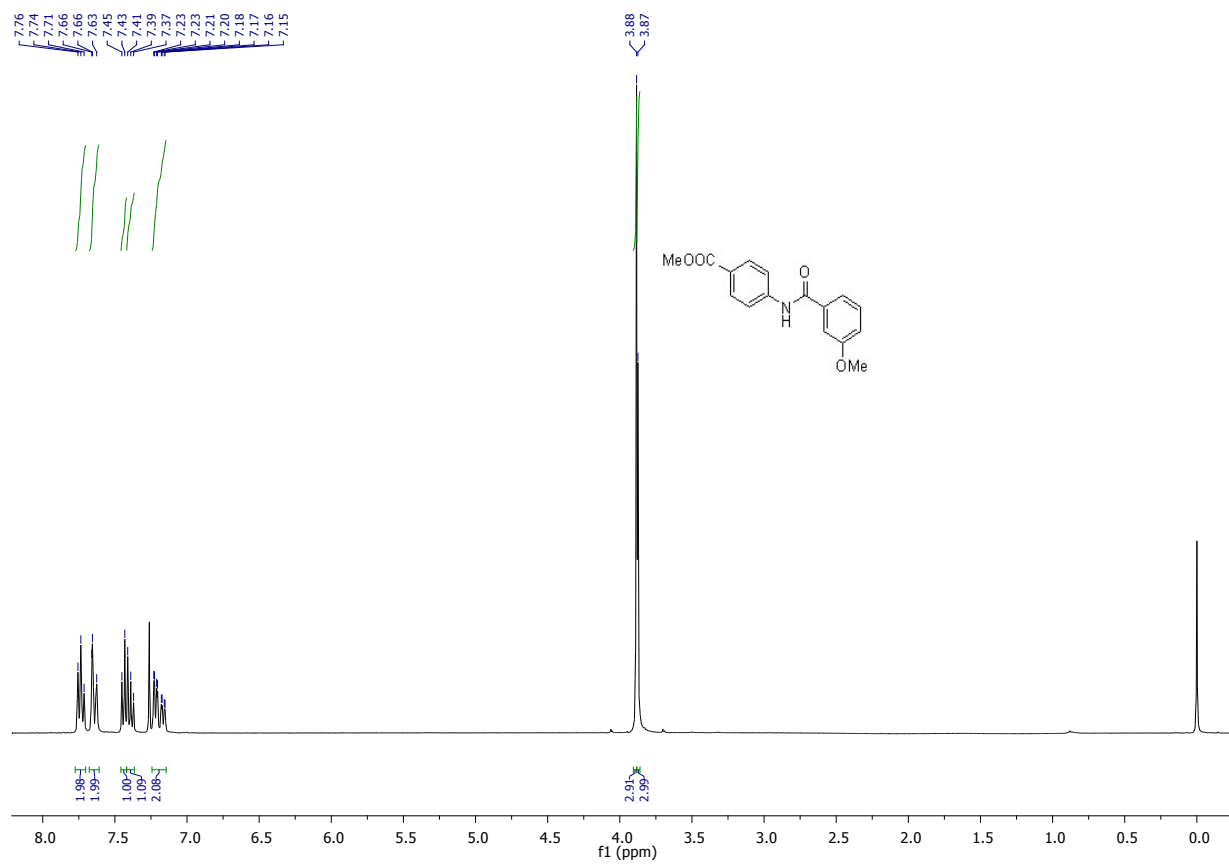

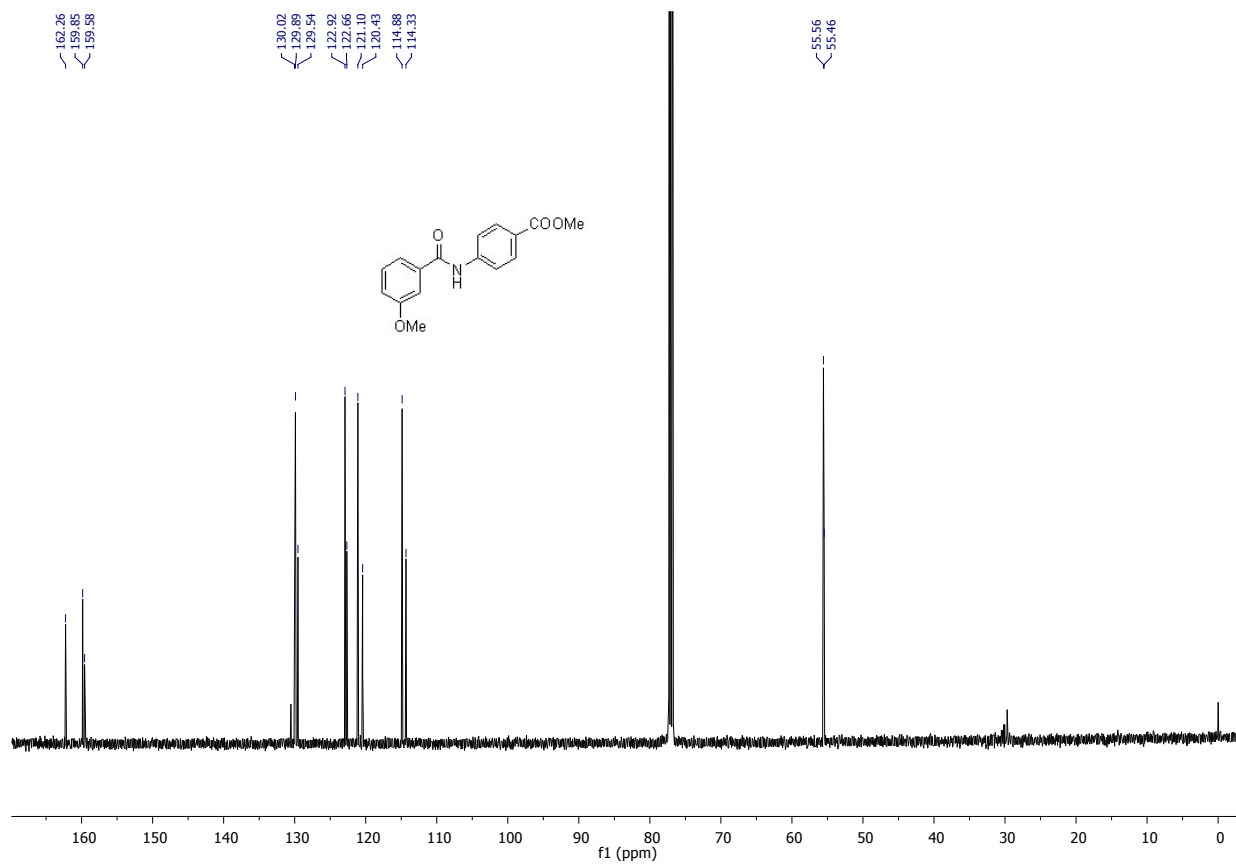

**2,6-Dimethyl-N-phenylbenzamide(1c): H<sup>1</sup> NMR & C<sup>13</sup> NMR**

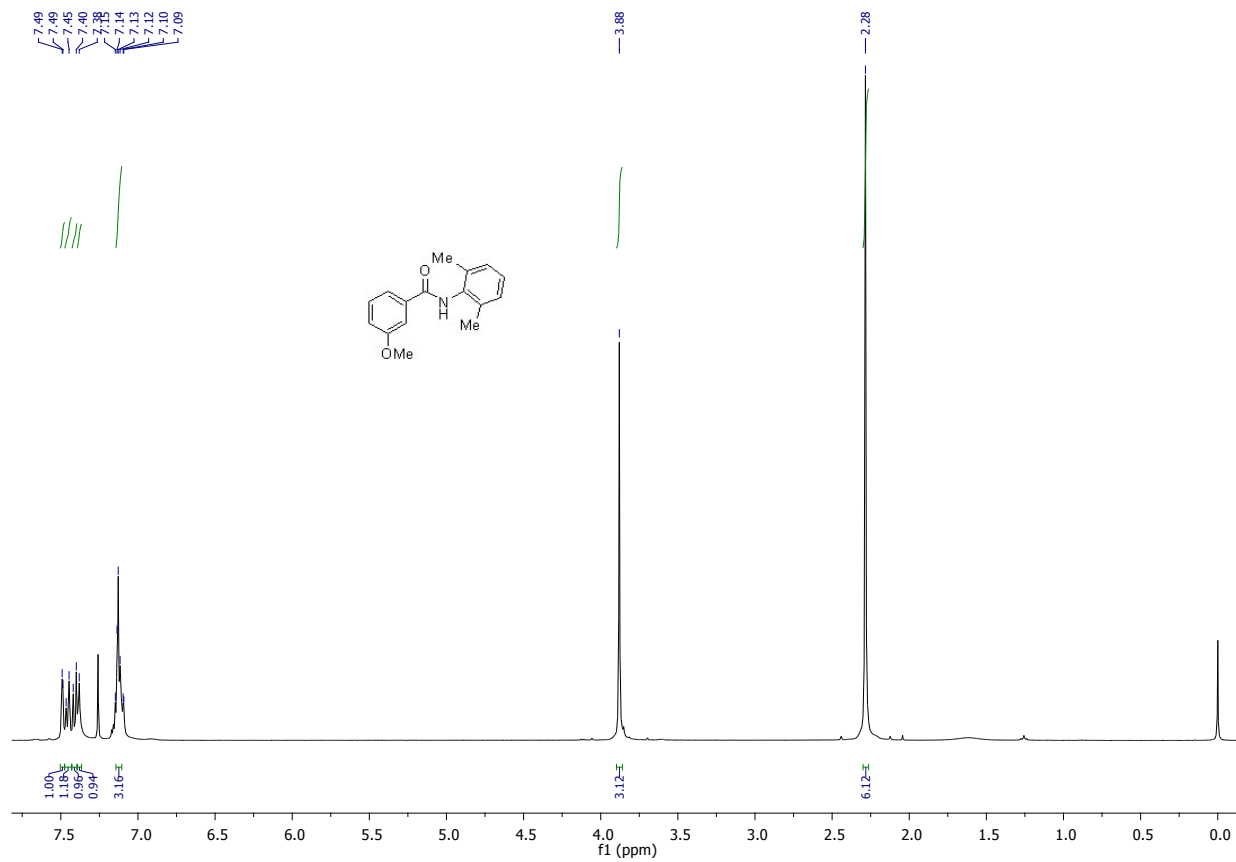

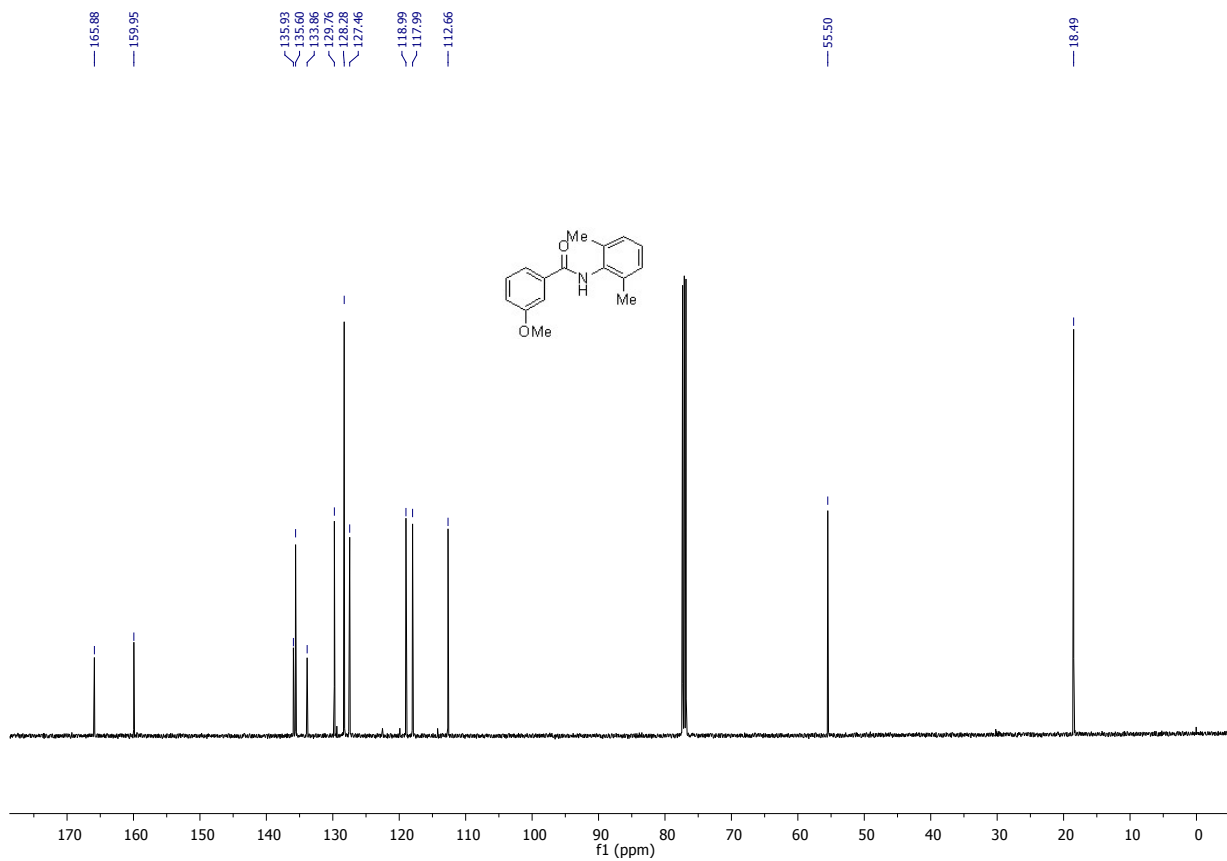

**3-Methoxy-N-(pyrimidin-2-yl)benzamide(1d):  $\text{H}^1$  NMR &  $\text{C}^{13}$  NMR**

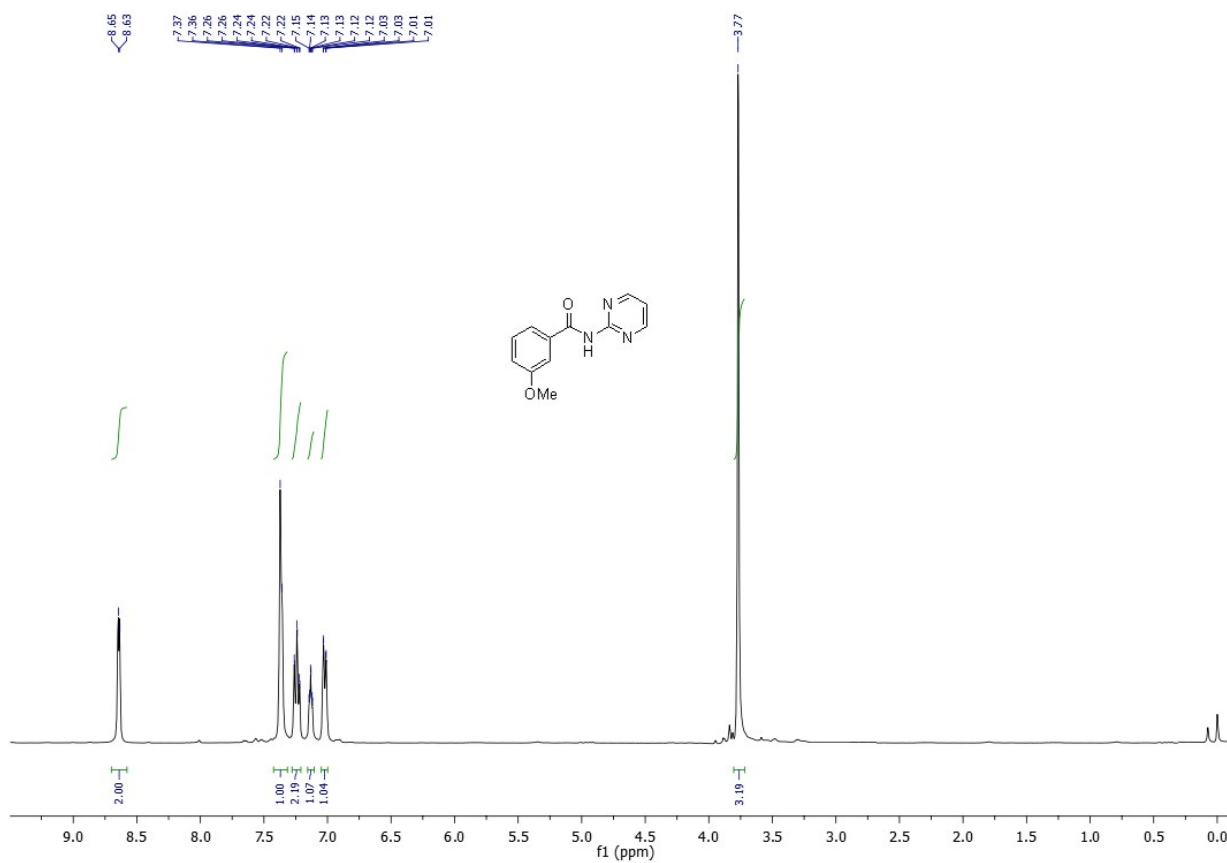

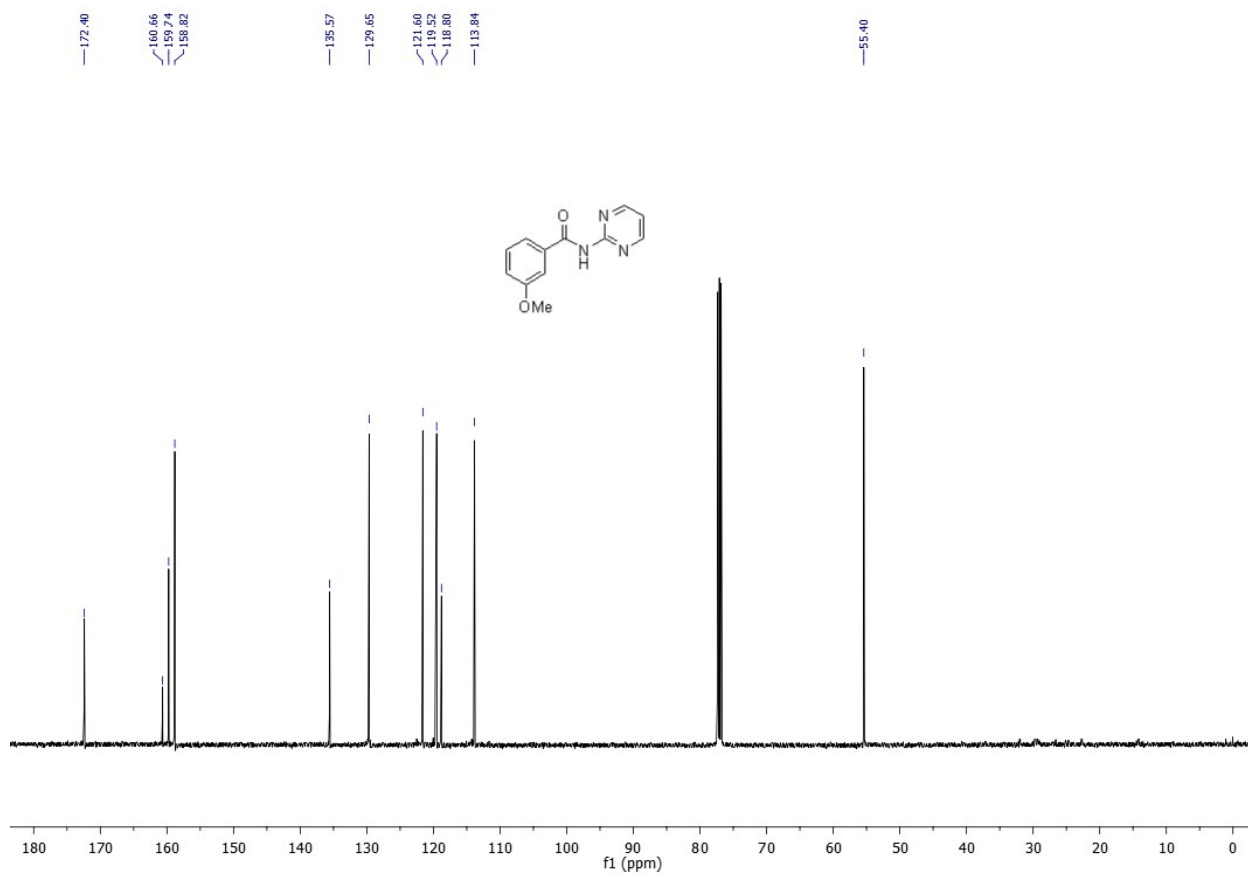

***N*-(Cyclopropylmethyl)-3-methoxybenzamide(1e):  $\text{H}^1$  NMR &  $\text{C}^{13}$  NMR**

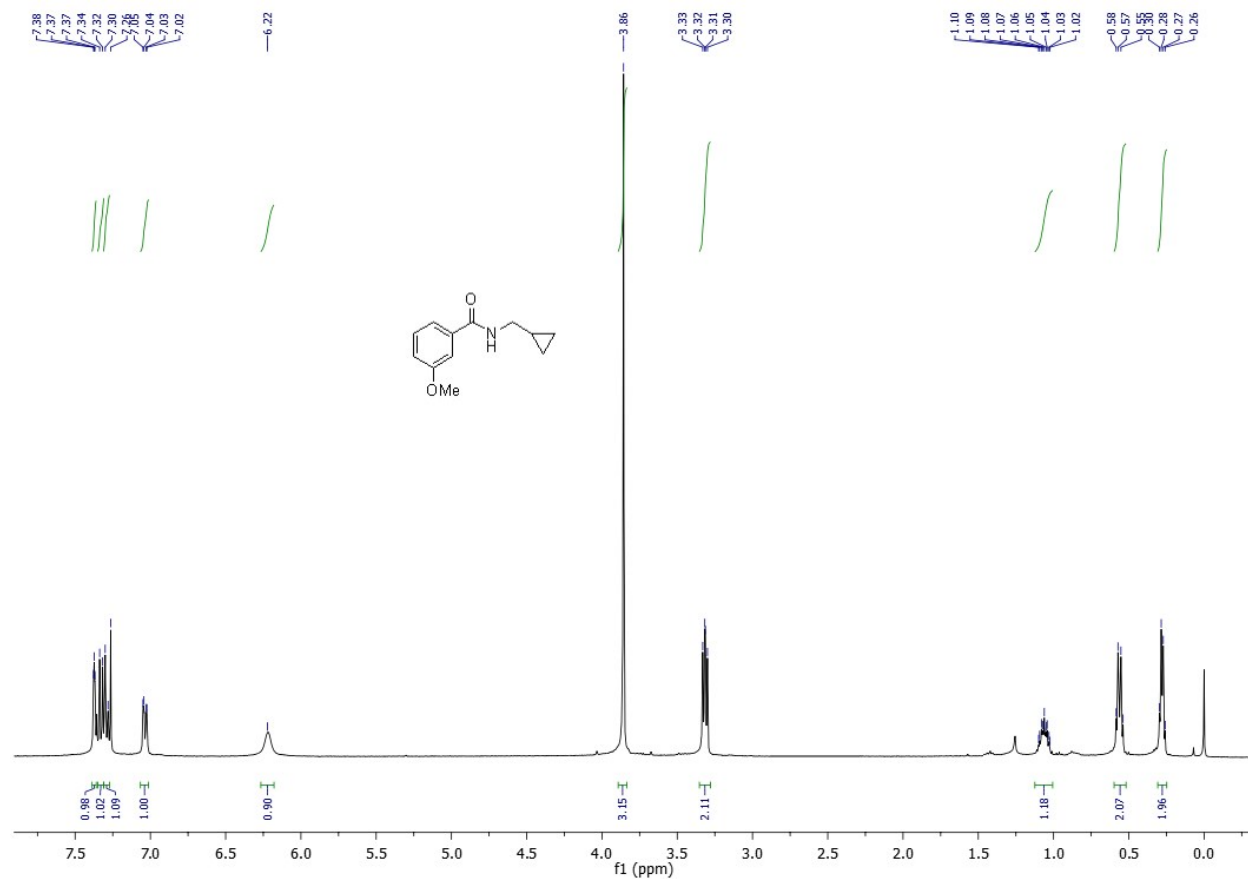

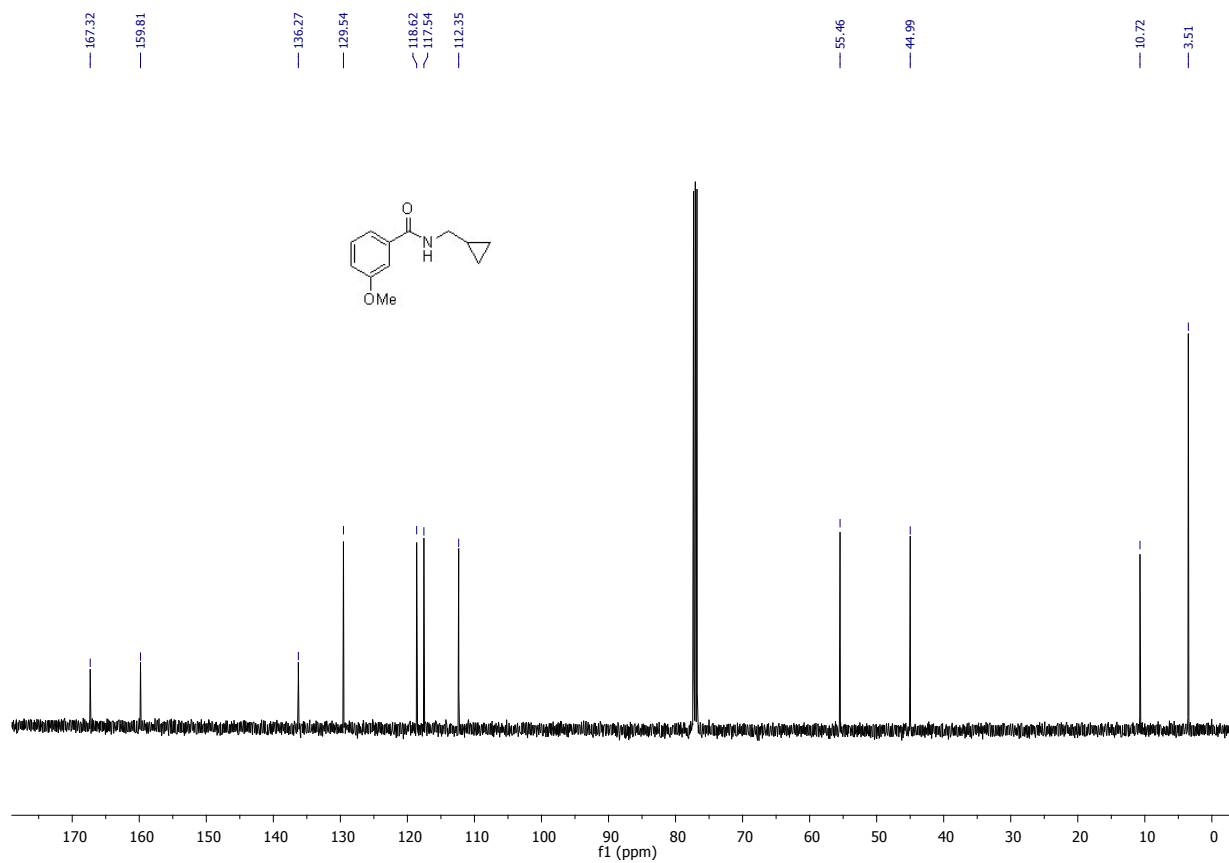

**(3-Methoxyphenyl)(morpholino)methanone(1f):  $H^1$  NMR &  $C^{13}$  NMR**

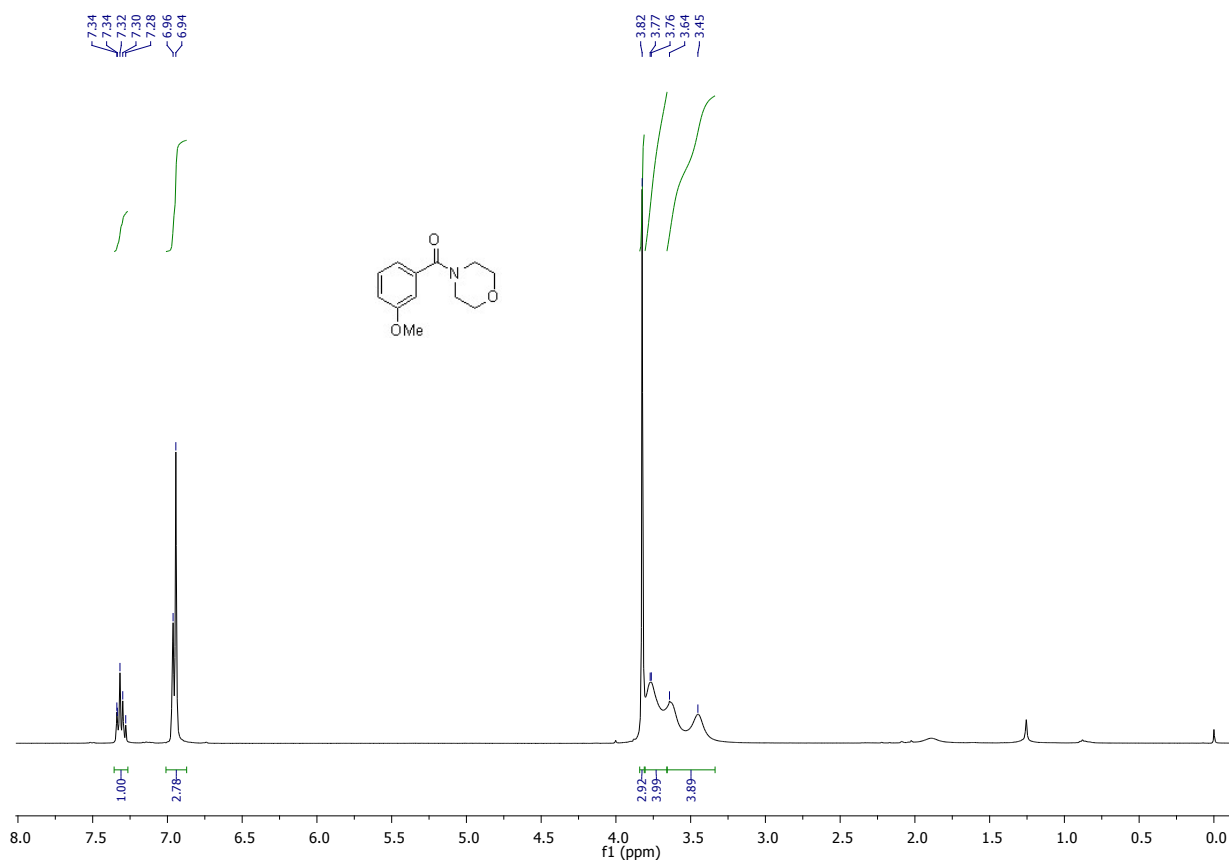

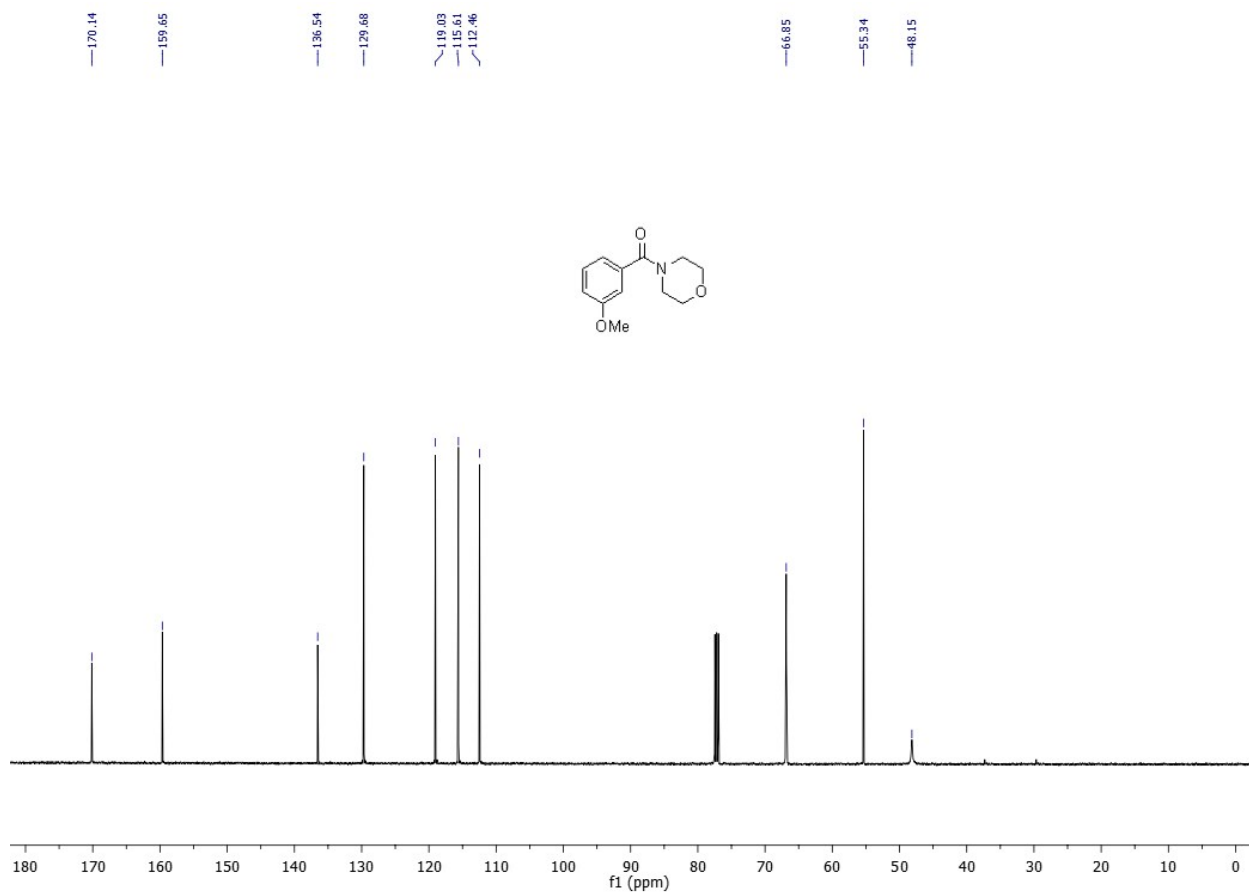

***N*-(Naphthalen-2-yl)-1-naphthamide(1g):  $H^1$  NMR &  $C^{13}$  NMR**

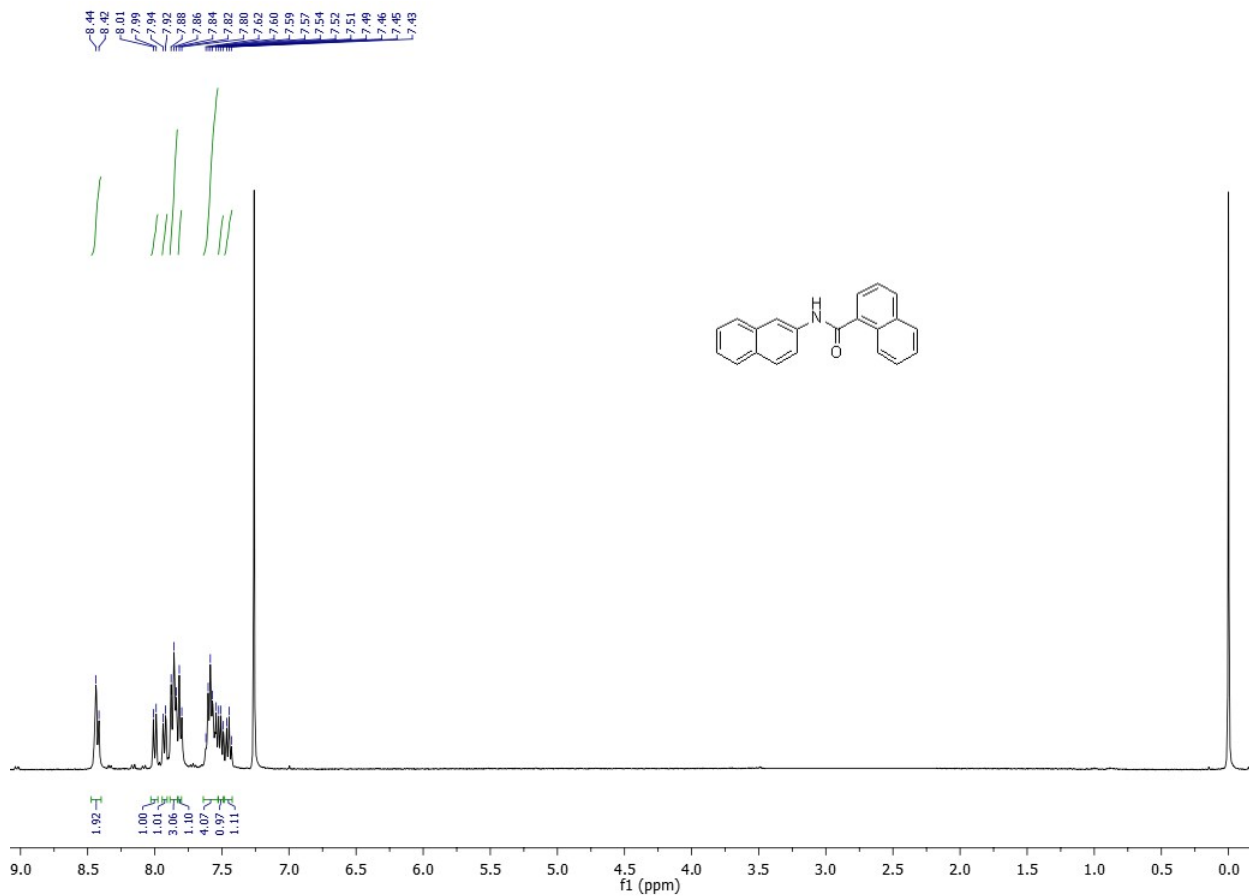

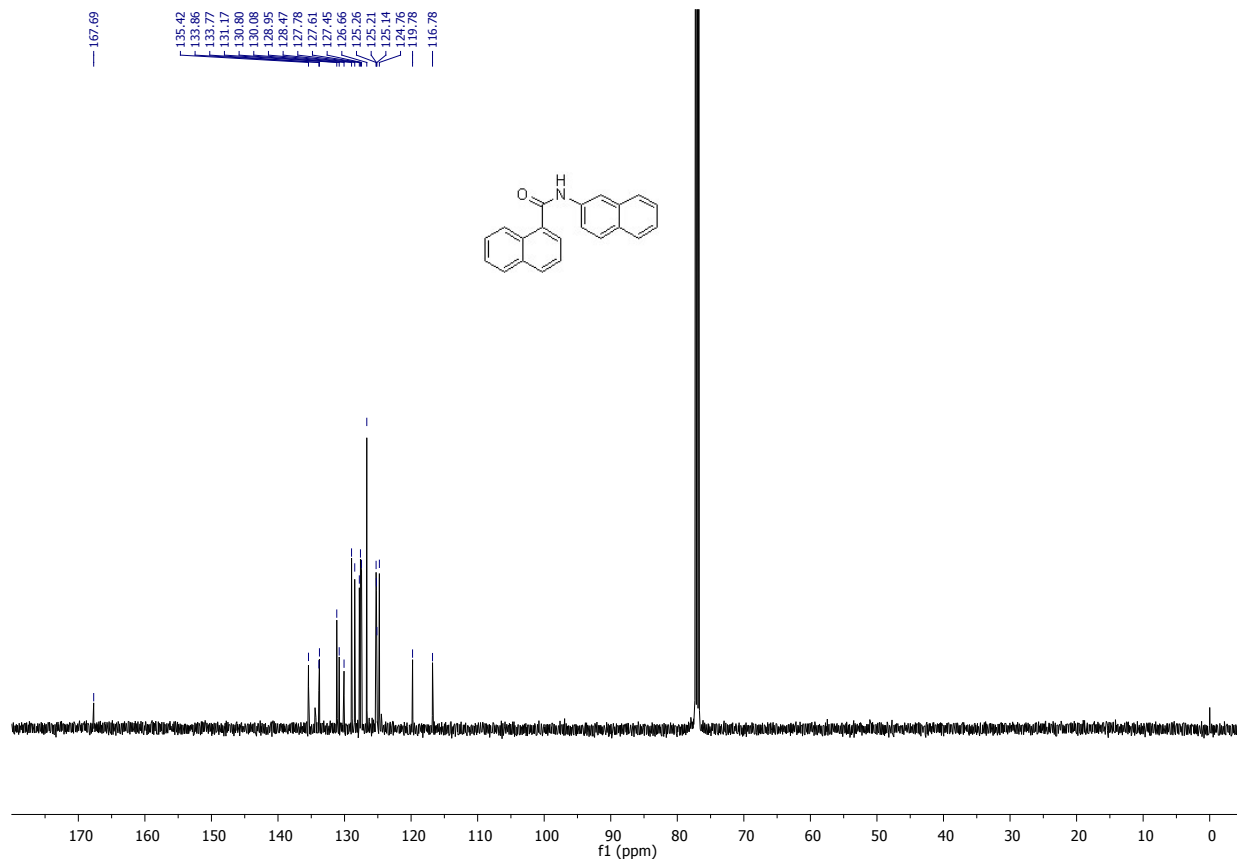

**N-(Cyclopropylmethyl)-1-naphthamide(1h): H<sup>1</sup> NMR & C<sup>13</sup> NMR**

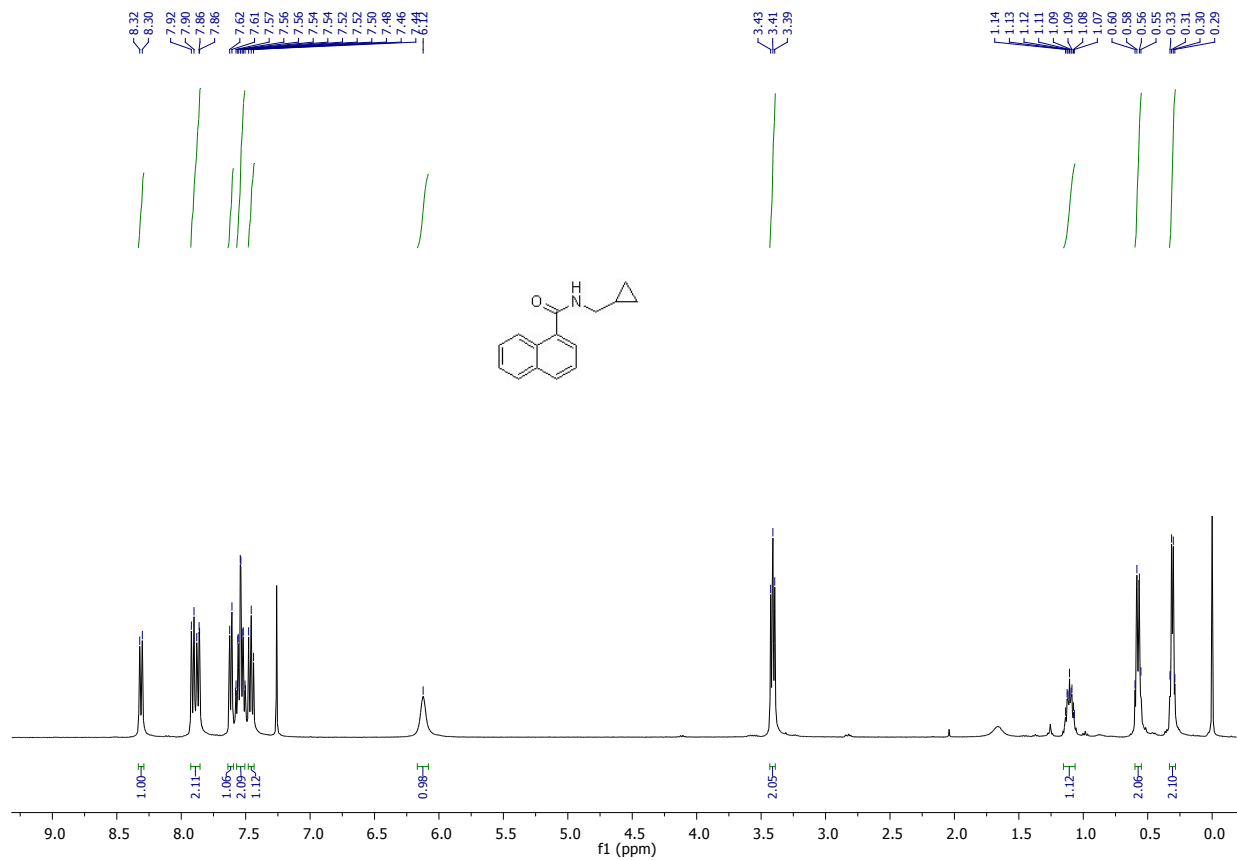



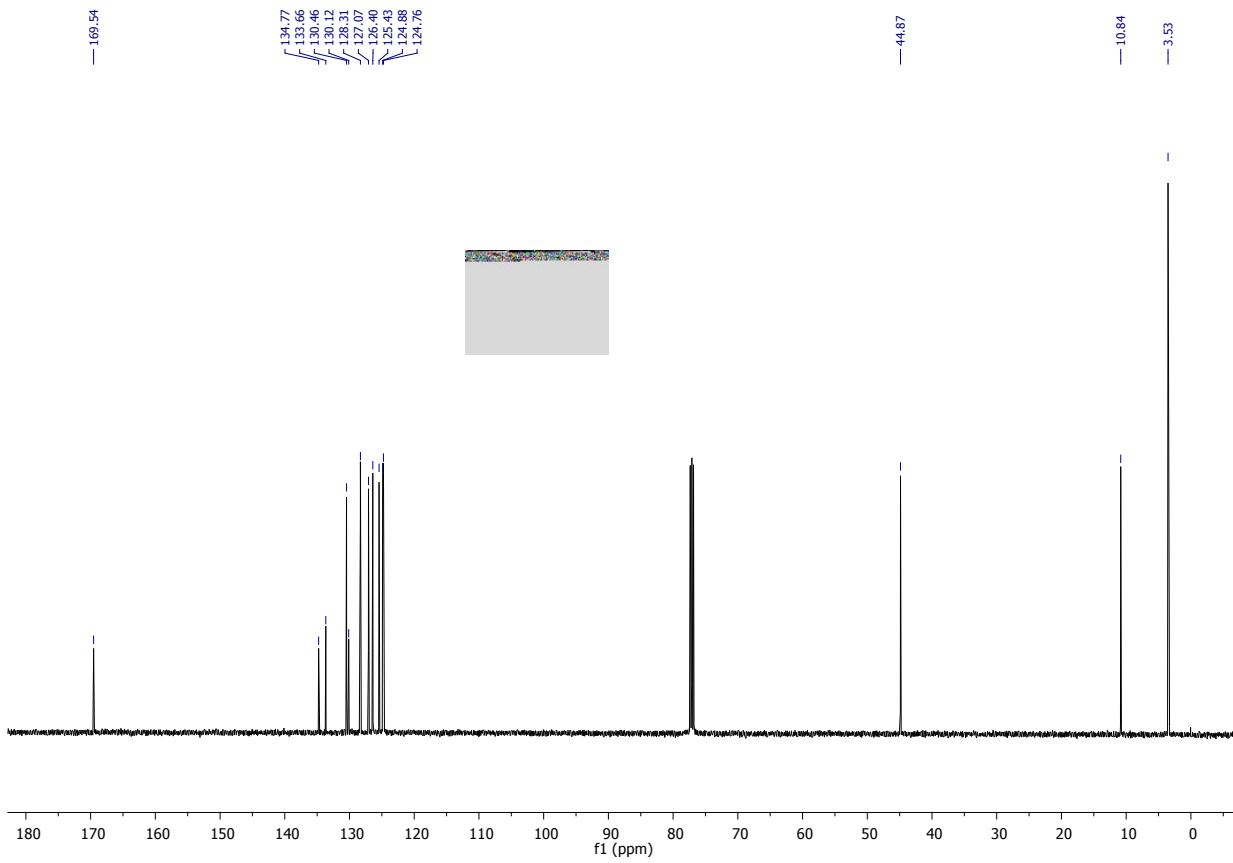

**Naphthalen-1-yl(piperidin-1-yl)methanone(1i):  $H^1$  NMR &  $C^{13}$  NMR**

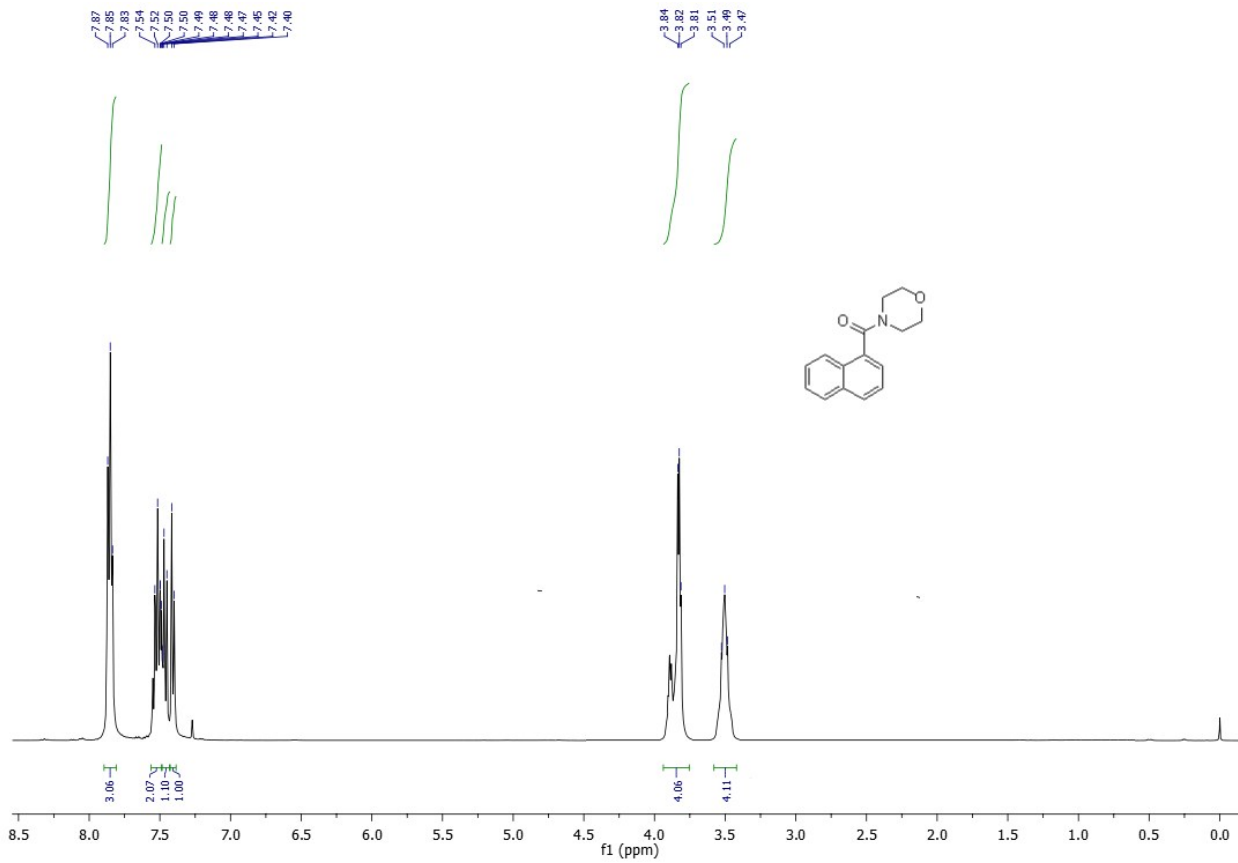

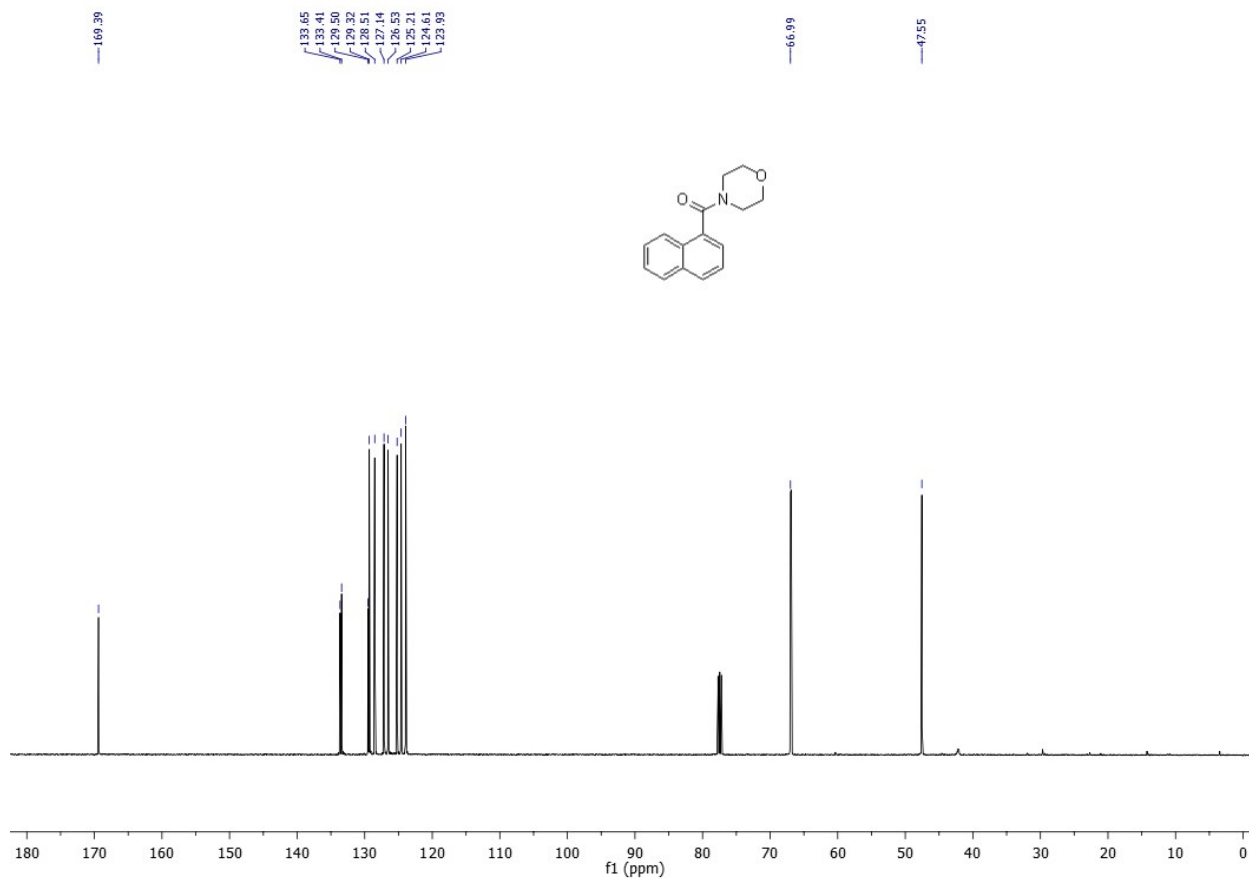

***N*-(Pyridin-2-yl)-1-naphthamide(1j):  $\text{H}^1$  NMR**

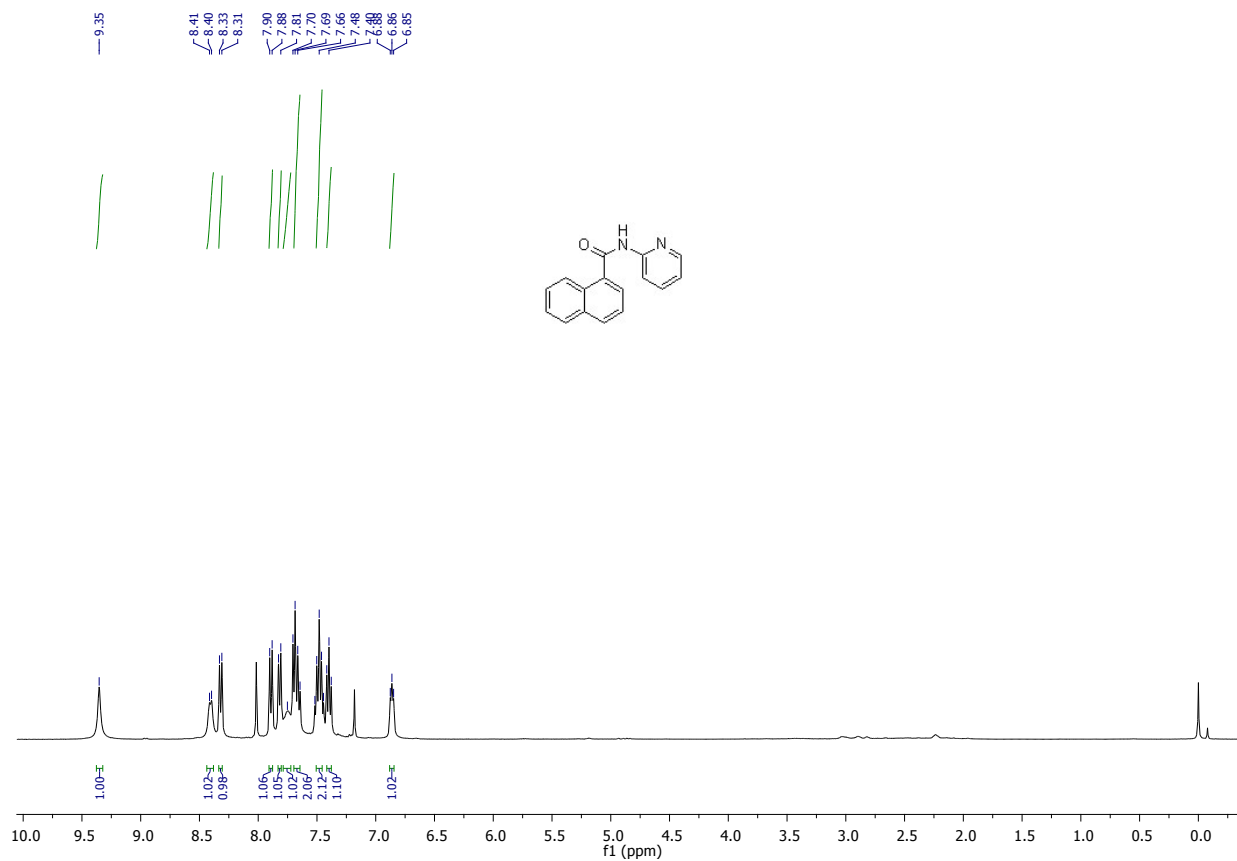

***N*-(4-Bromopyridin-2-yl)-1-naphthamide(1k): H<sup>1</sup> NMR & C<sup>13</sup> NMR**

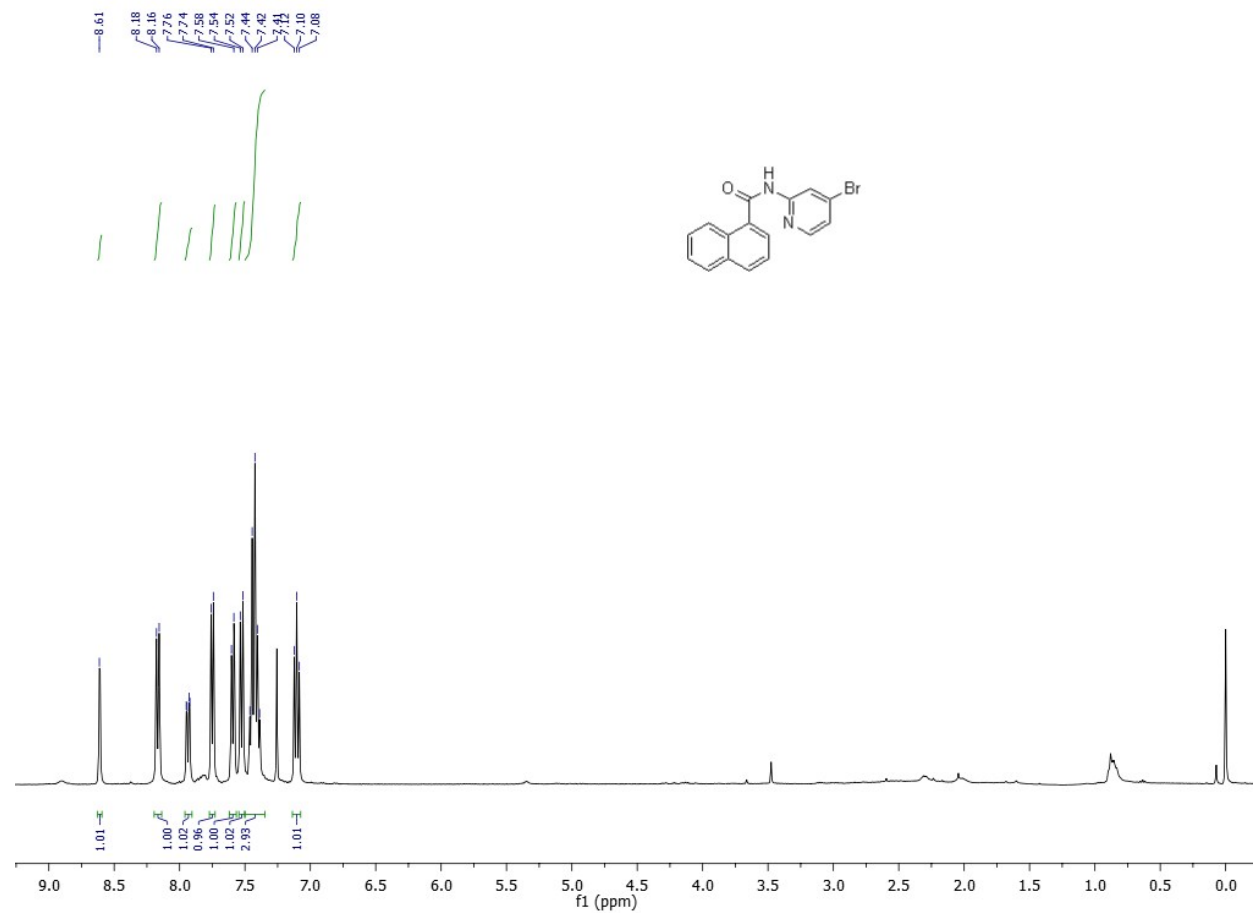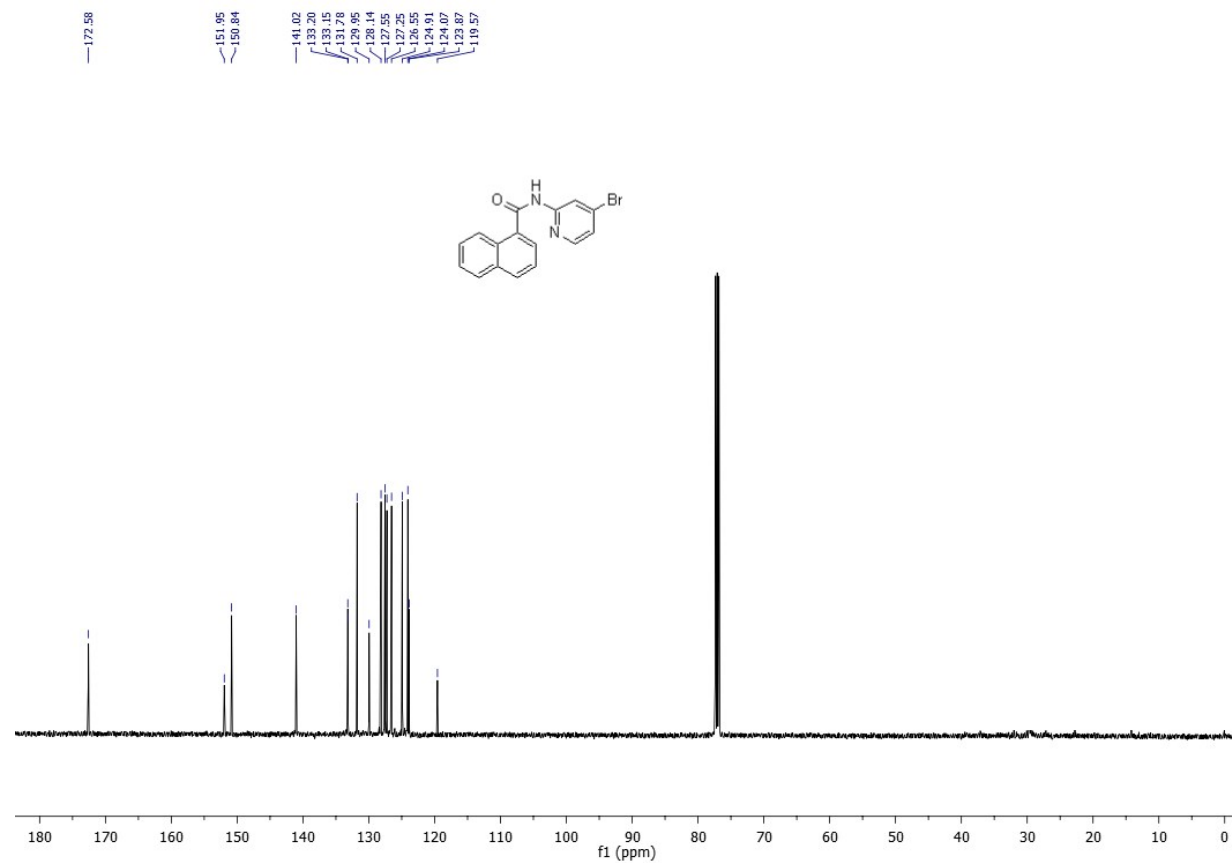

***N*-(2-Chloropyridin-3-yl)-1-naphthamide(1):  $H^1$  NMR &  $C^{13}$  NMR**

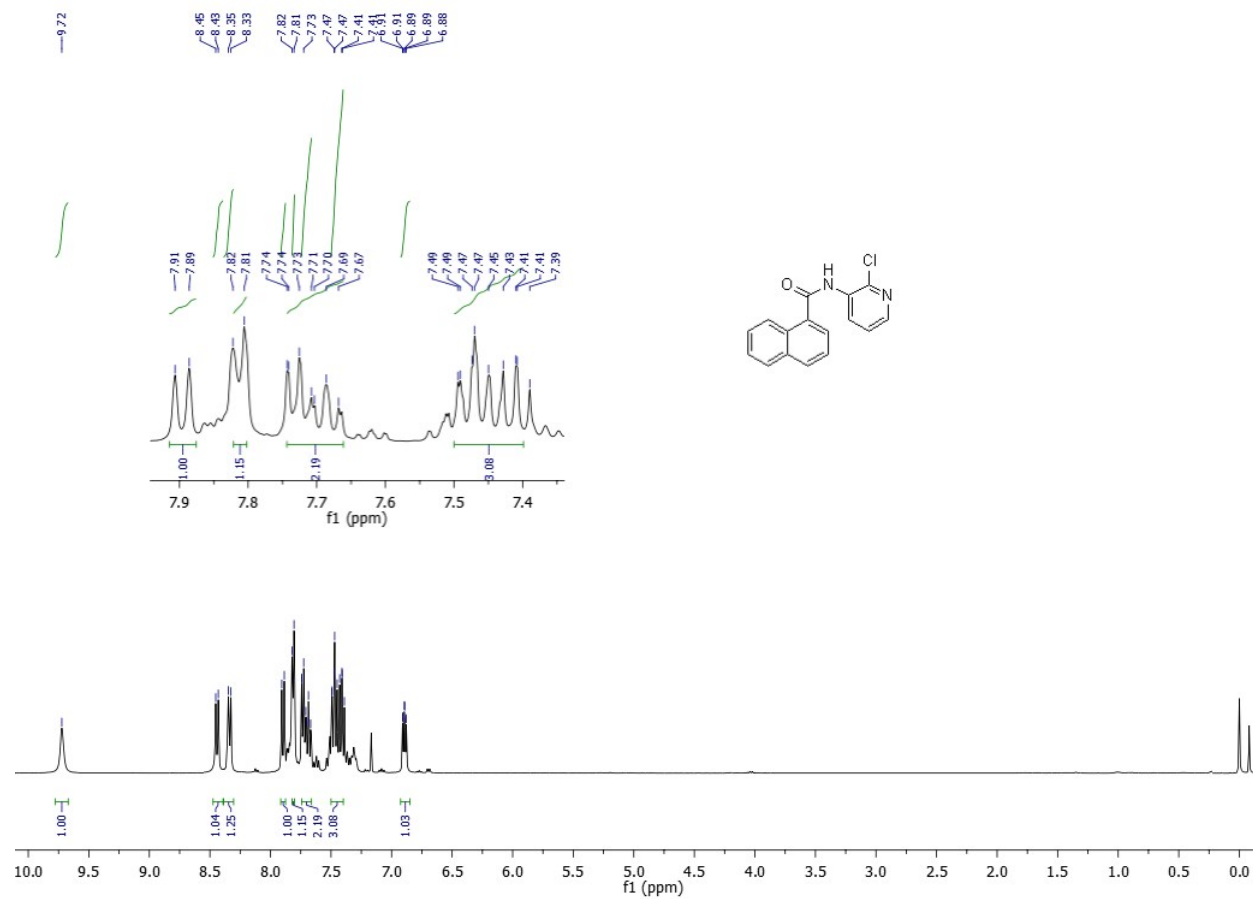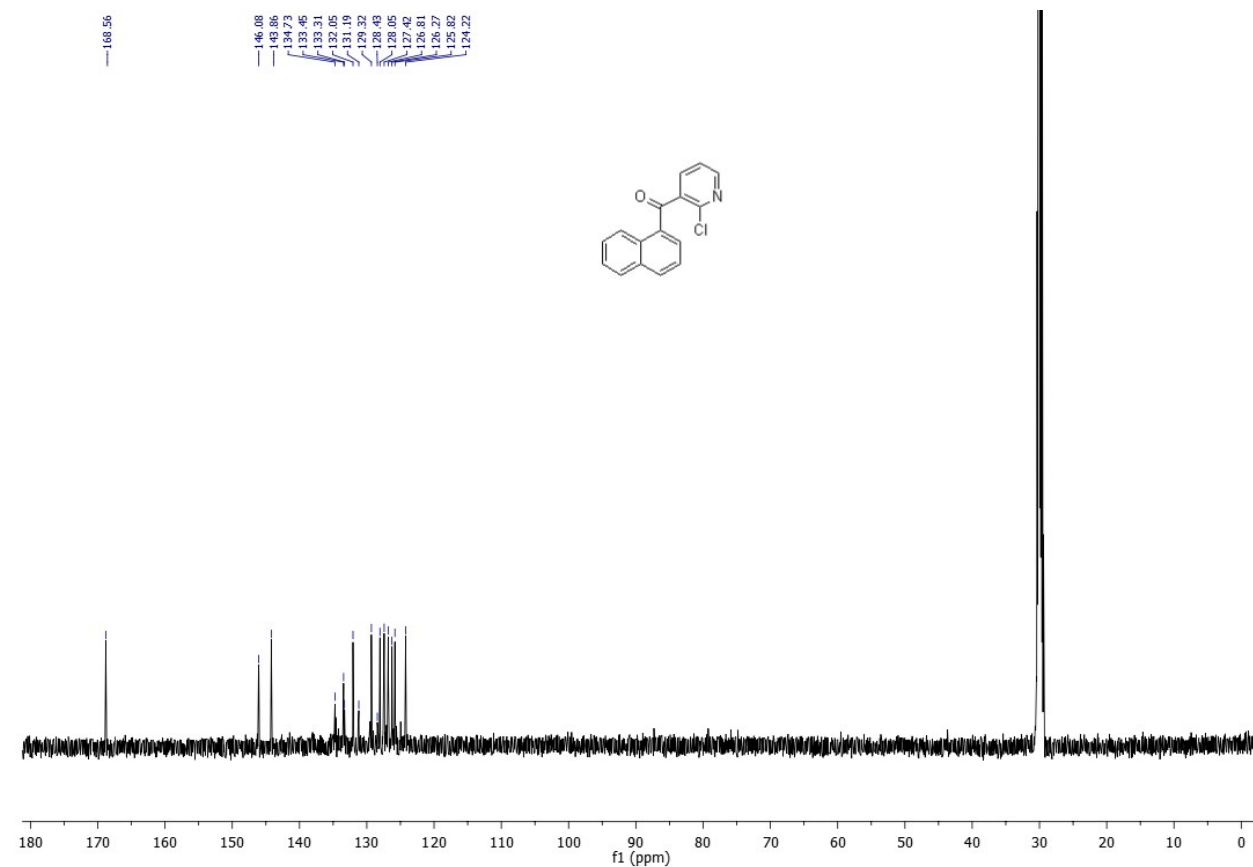

*N*-(Pyrimidin-2-yl)-1-naphthamide(1m): H<sup>1</sup> NMR & C<sup>13</sup> NMR

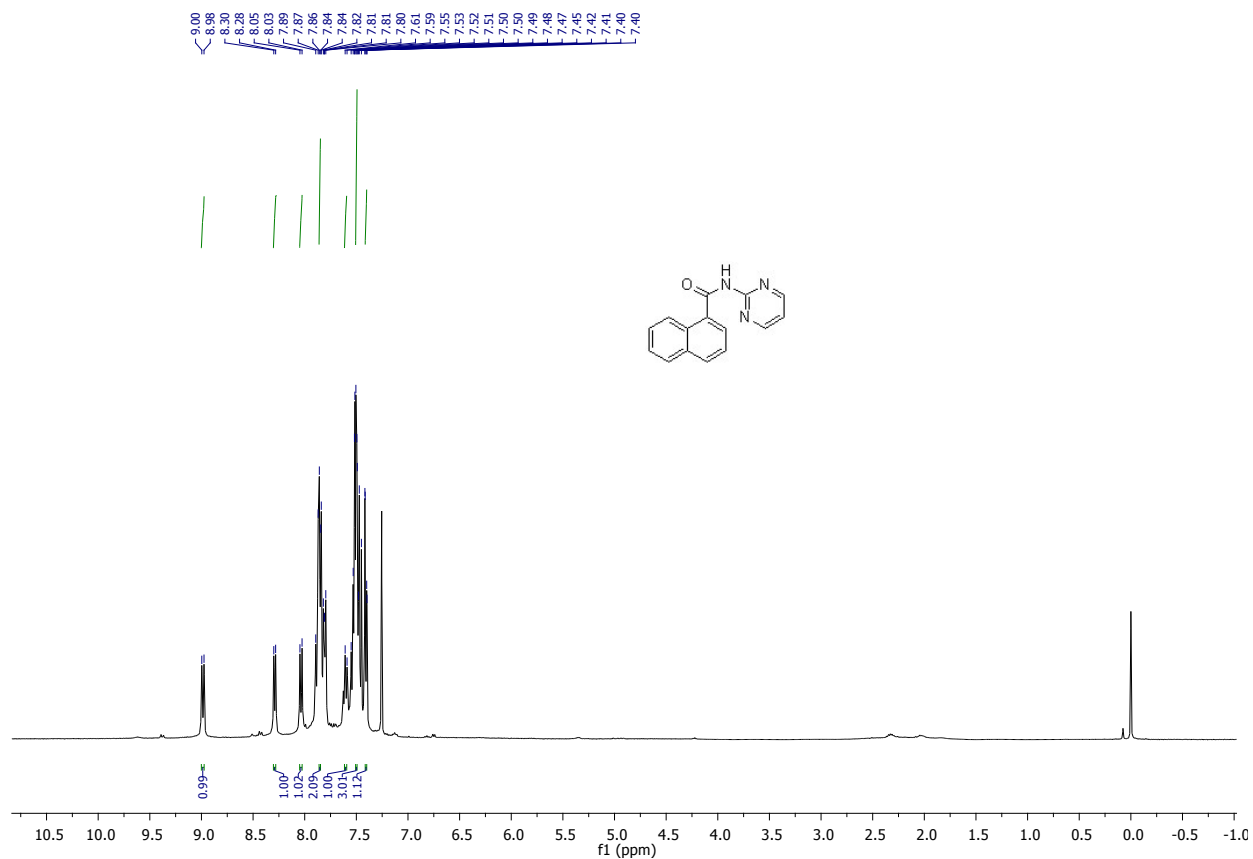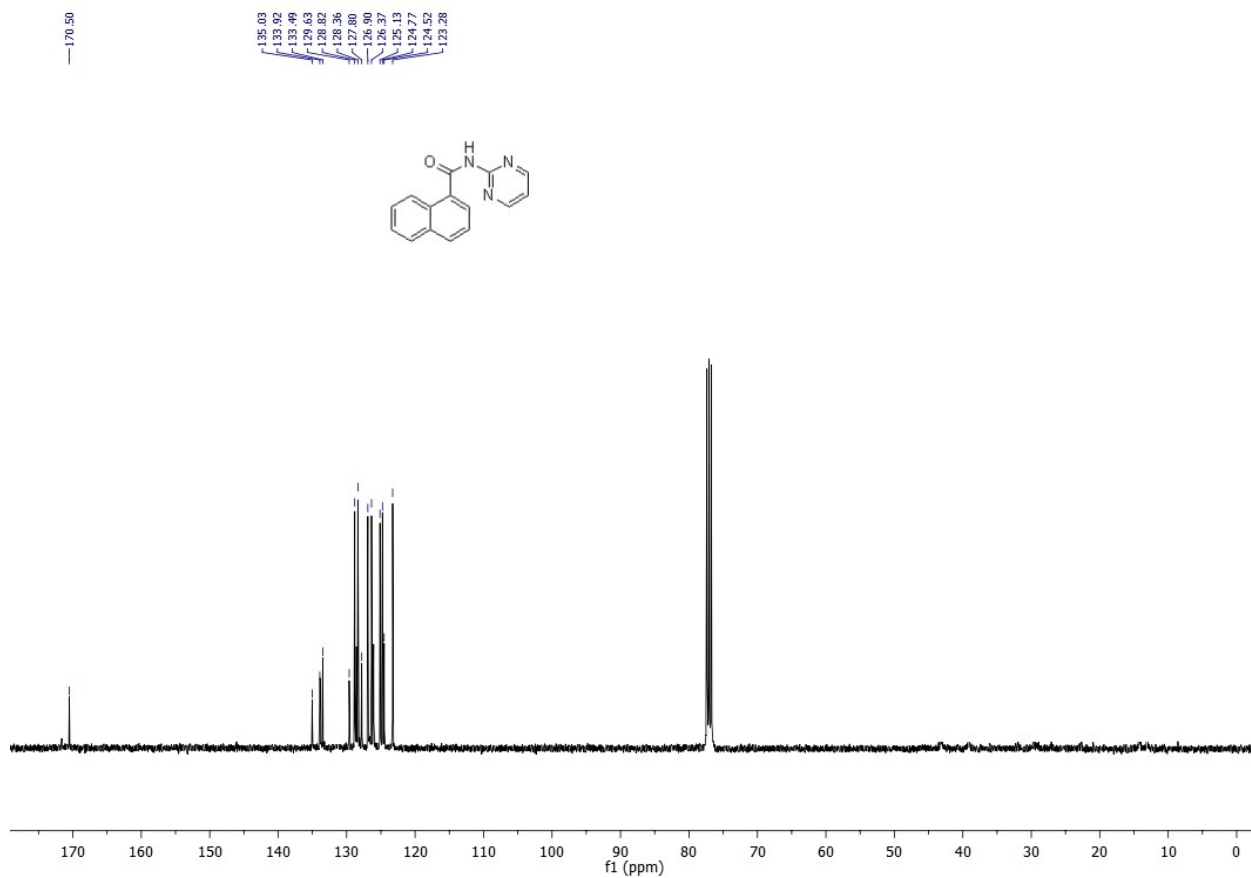

**N-Phenylpivalamide(2a): H<sup>1</sup> NMR & C<sup>13</sup> NMR**

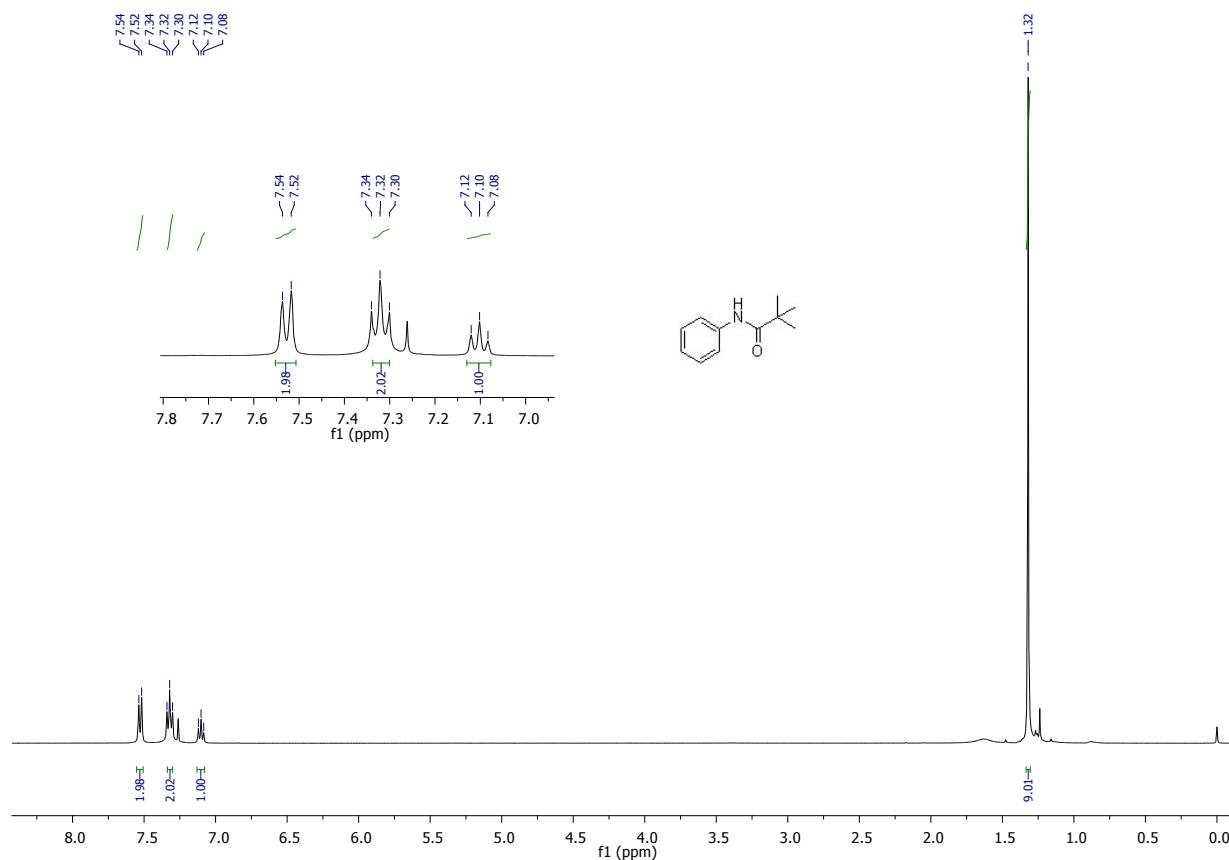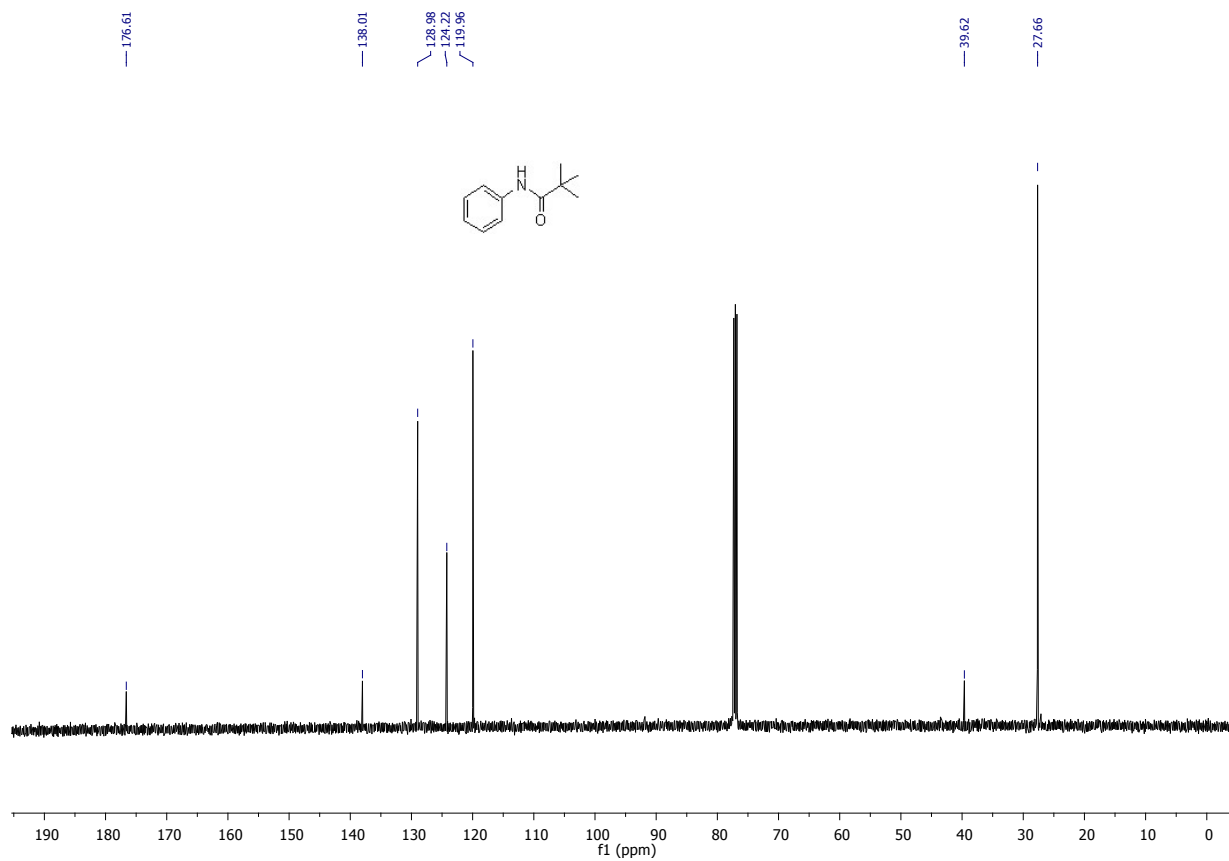

*N*-(*p*-Tolyl)pivalamide(2b):  $H^1$  NMR &  $C^{13}$  NMR

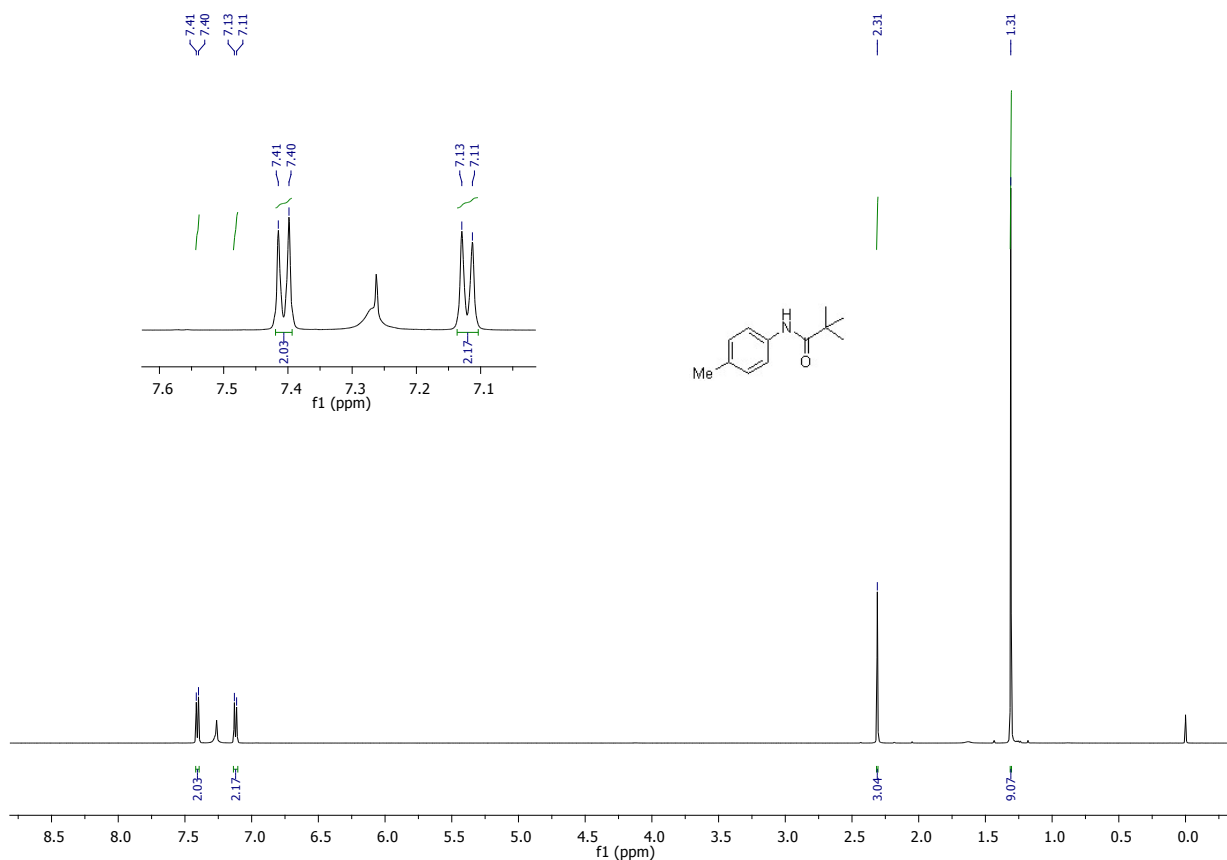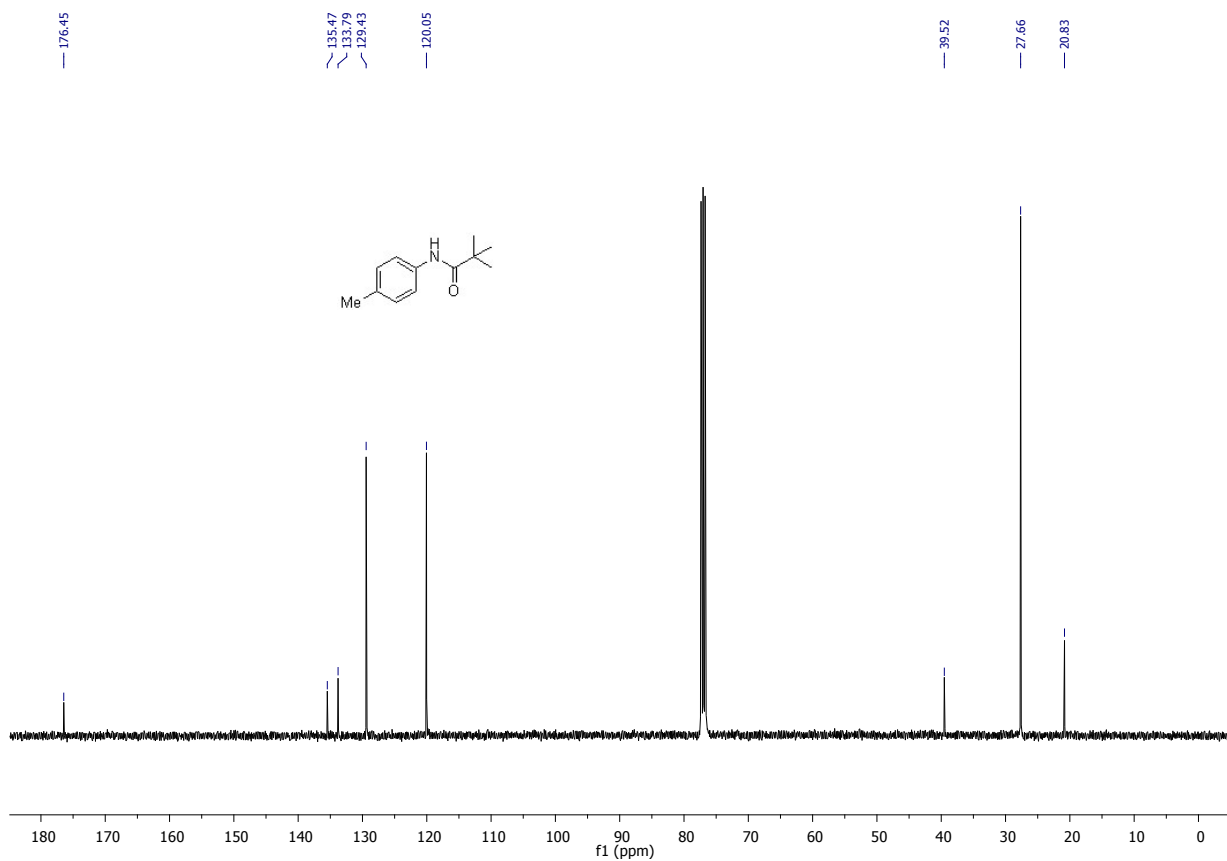

# Methoxyphenyl)pivalamide(2c): $^1\text{H}$ NMR & $^{13}\text{C}$ NMR

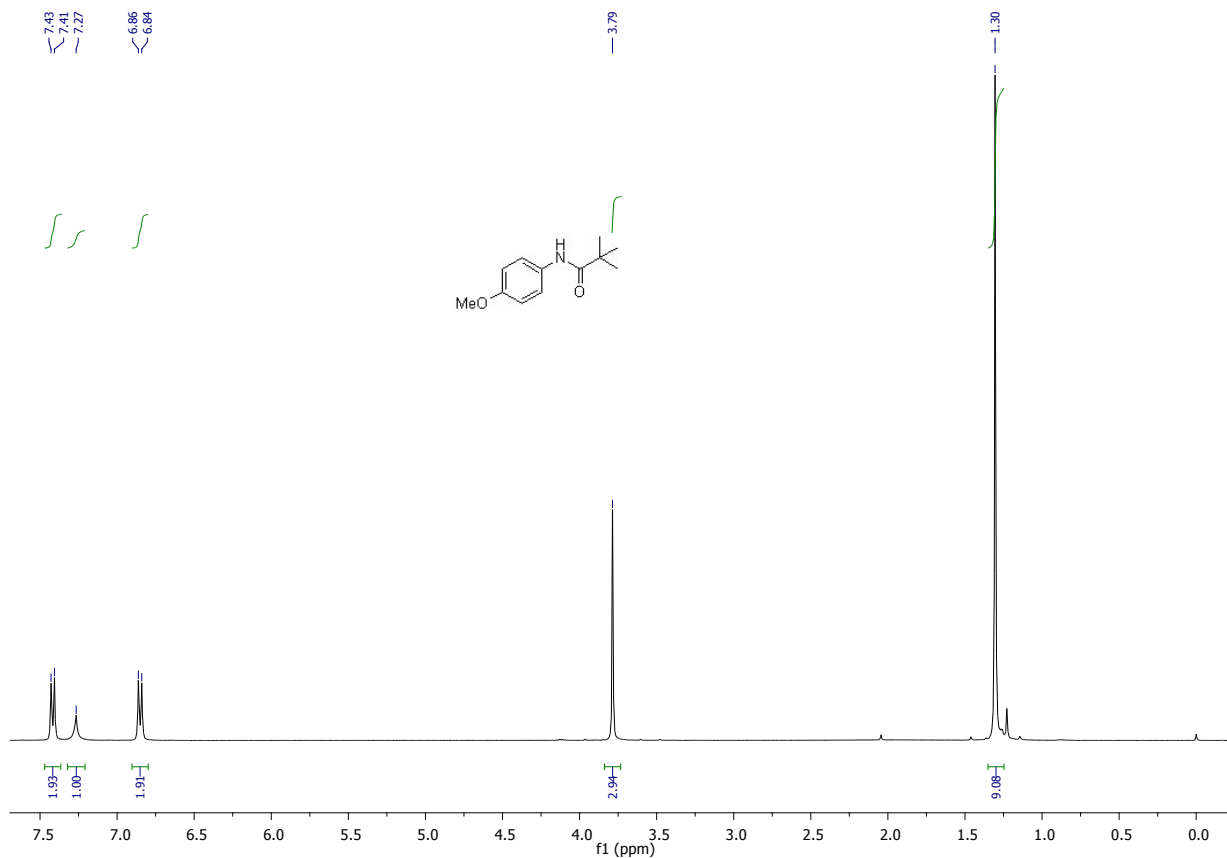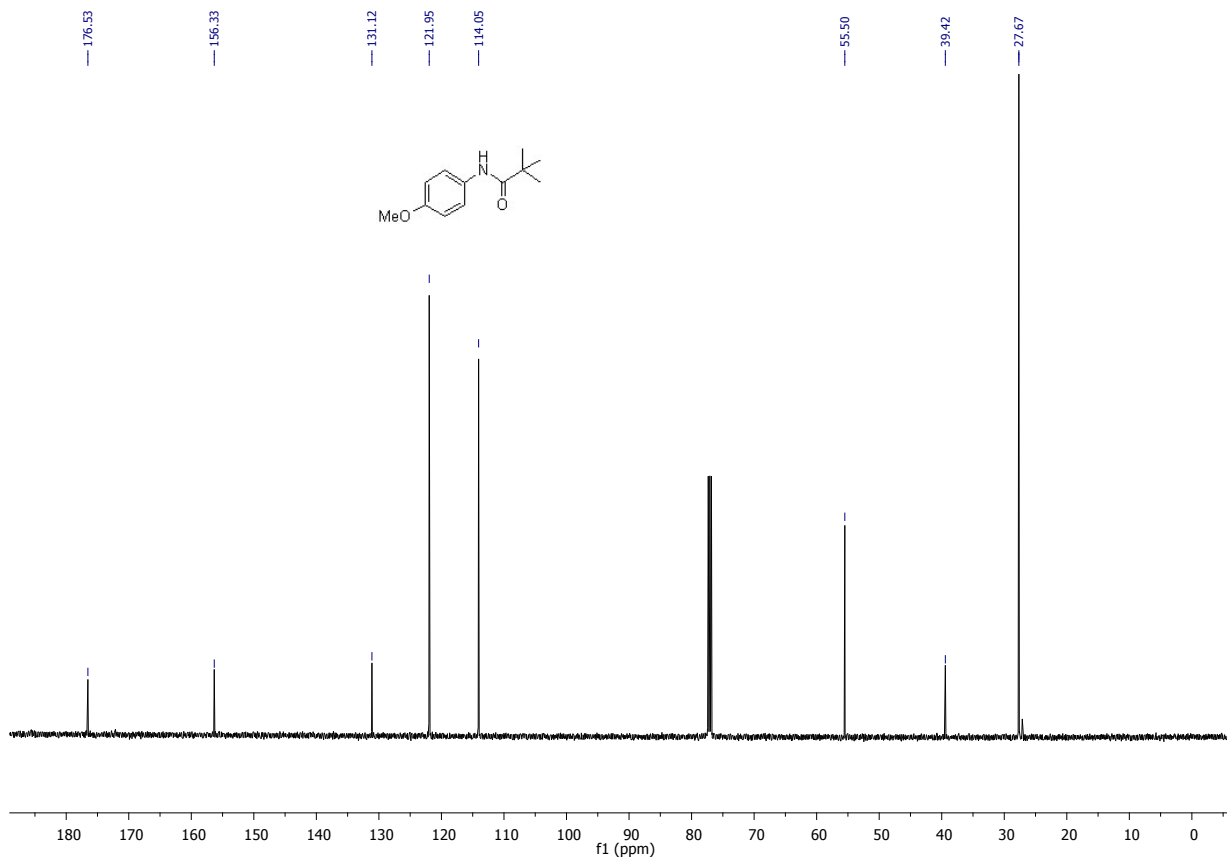



*N*-(2,6-Dimethylphenyl)pivalamide(2d):  $^1\text{H}$  NMR &  $^{13}\text{C}$  NMR

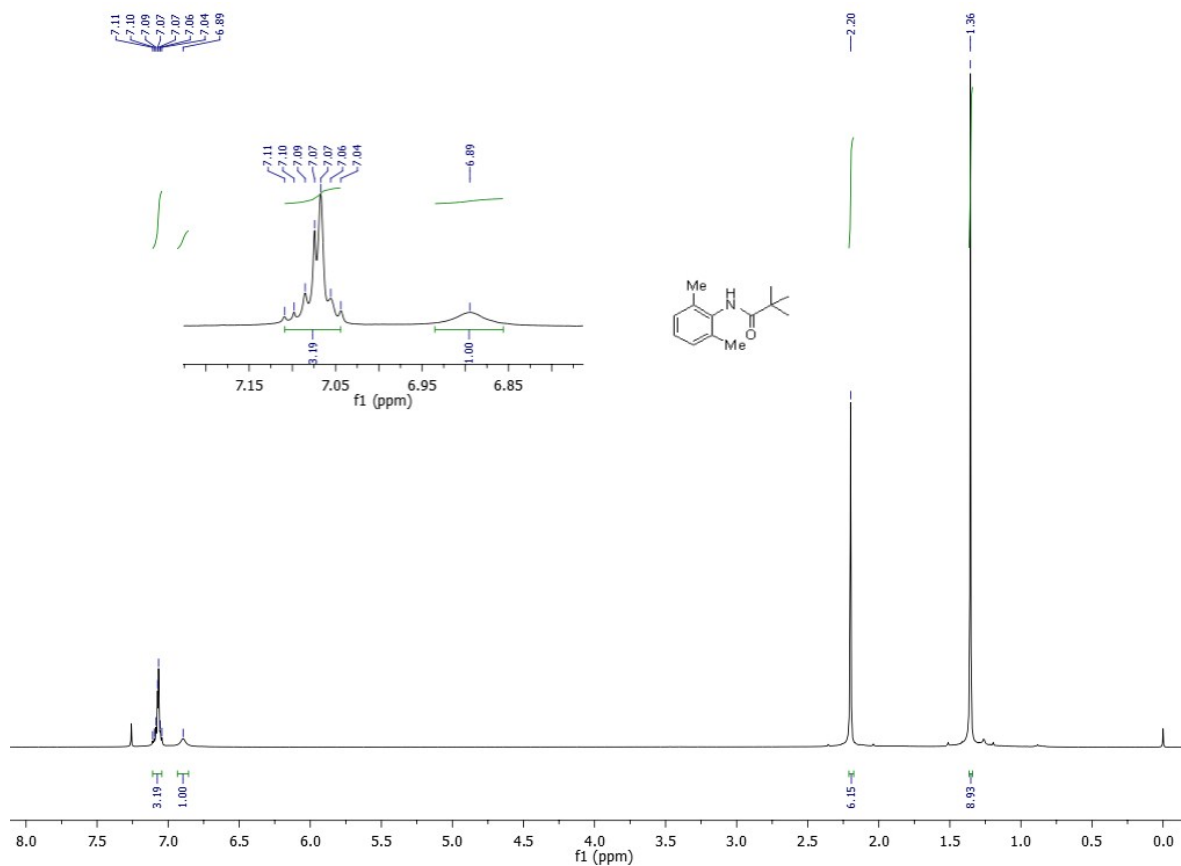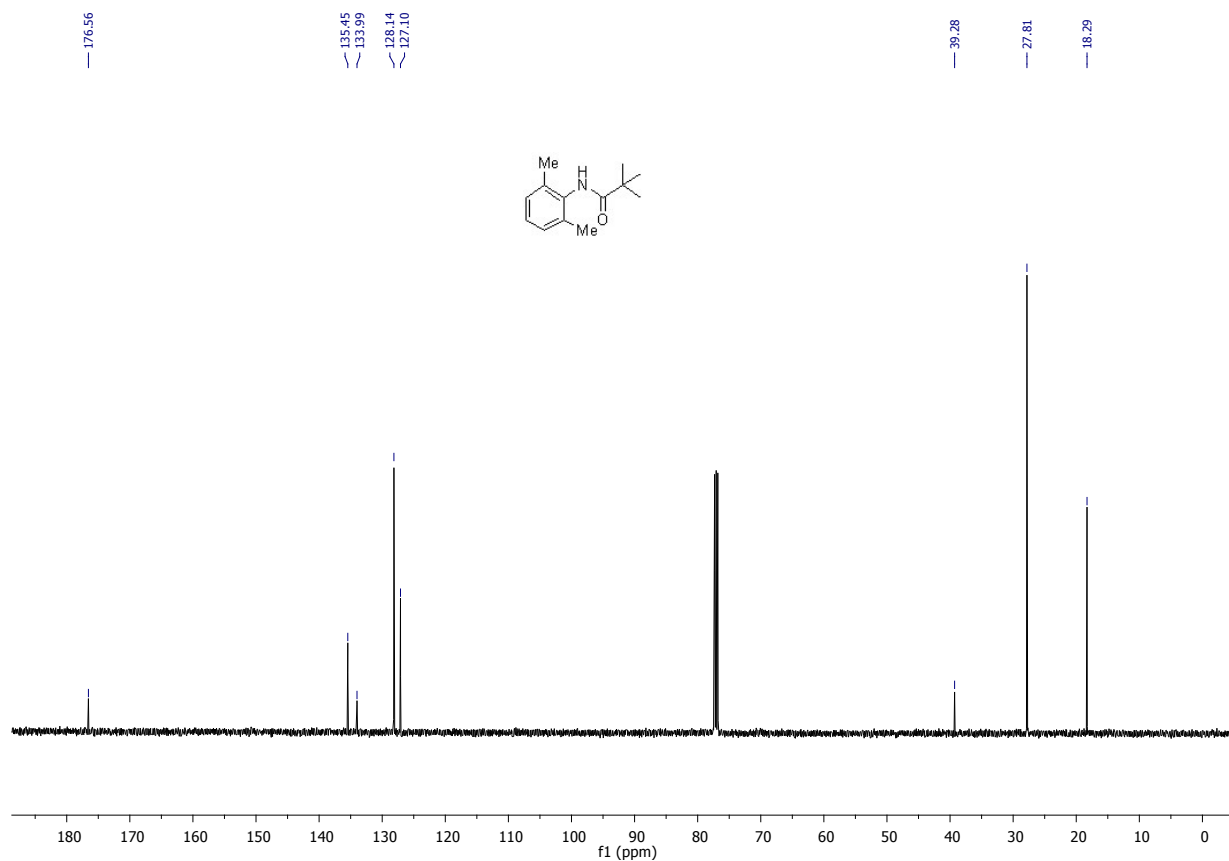

Methyl 2-methoxy-4-pivalamidobenzoate(2e): H<sup>1</sup> NMR & C<sup>13</sup> NMR

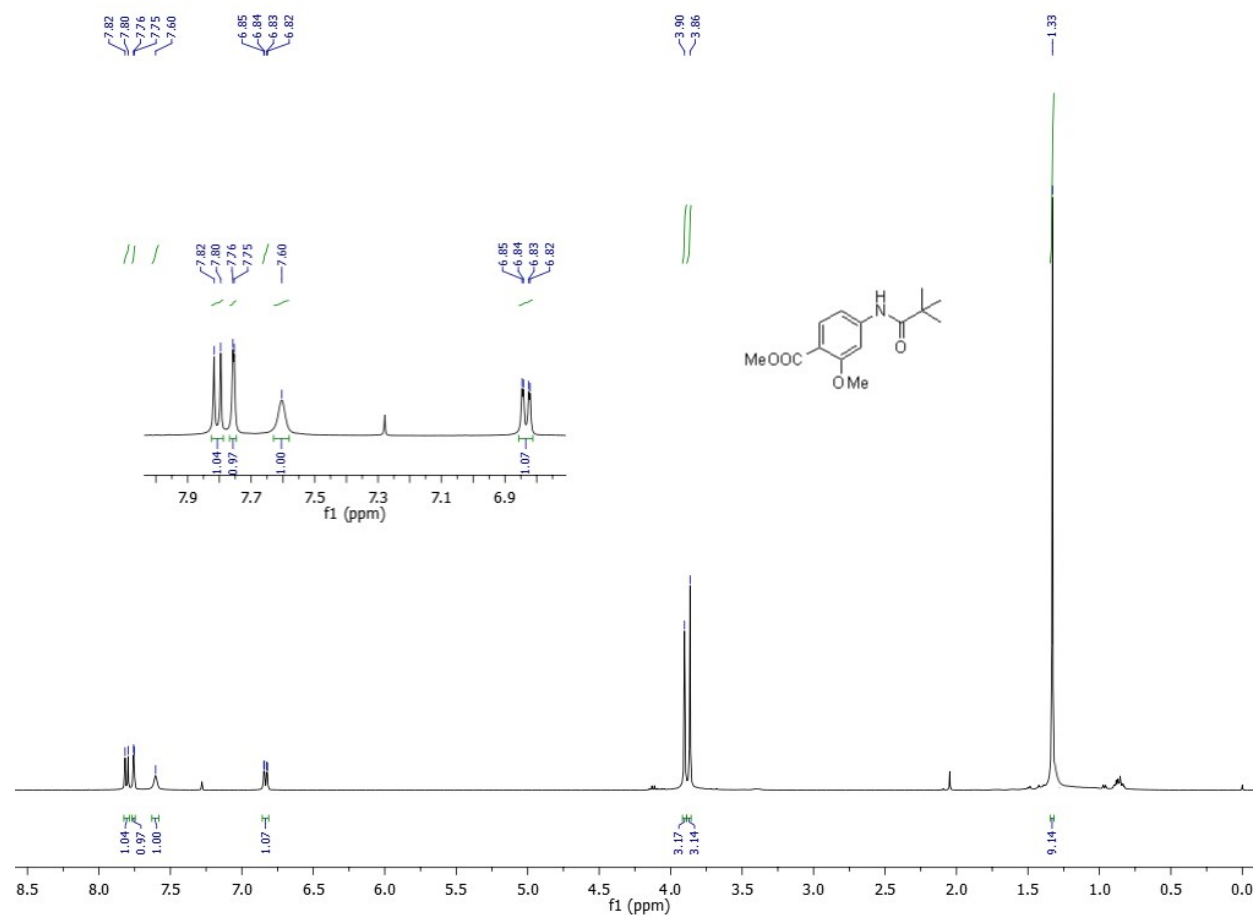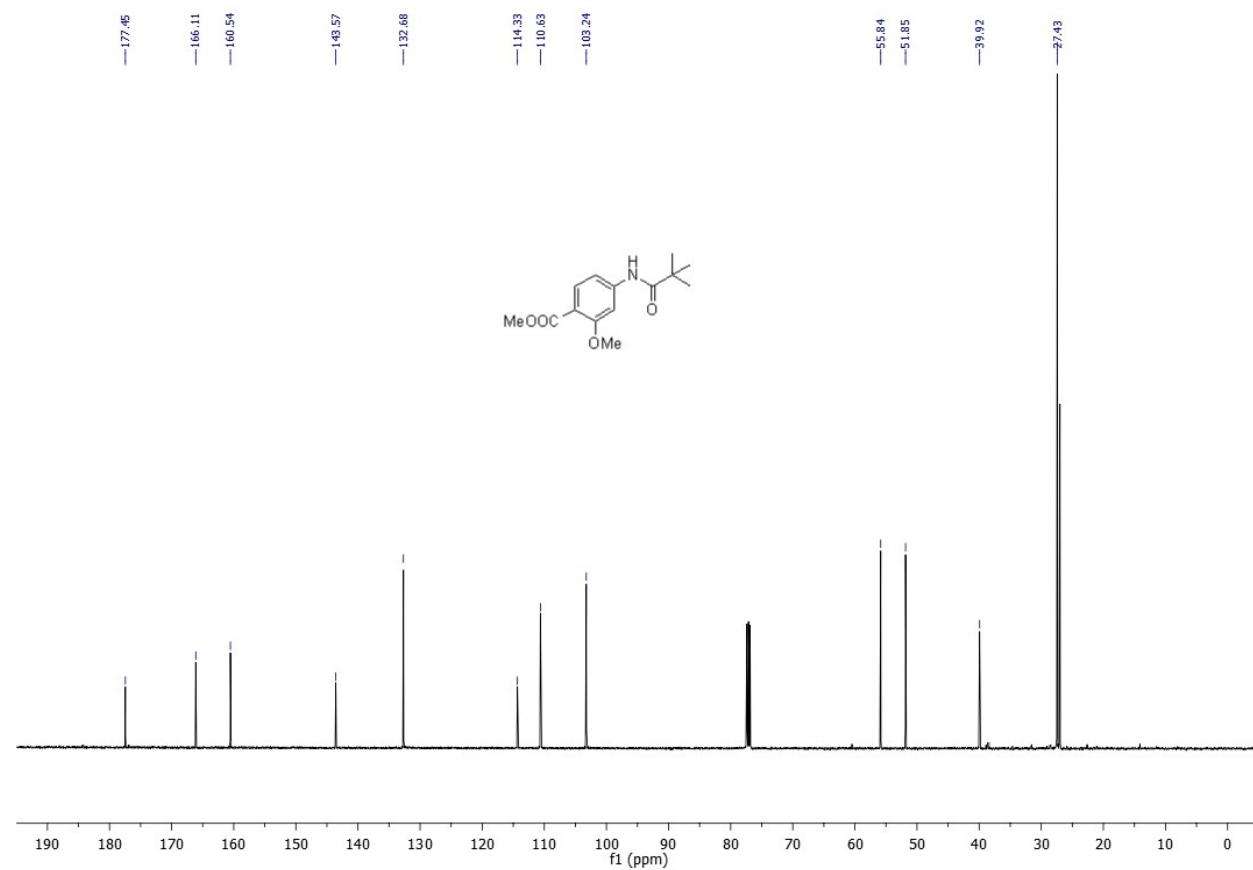

***N*-(2-Iodophenyl)pivalamide(2f):  $^1\text{H}$  NMR &  $^{13}\text{C}$  NMR**

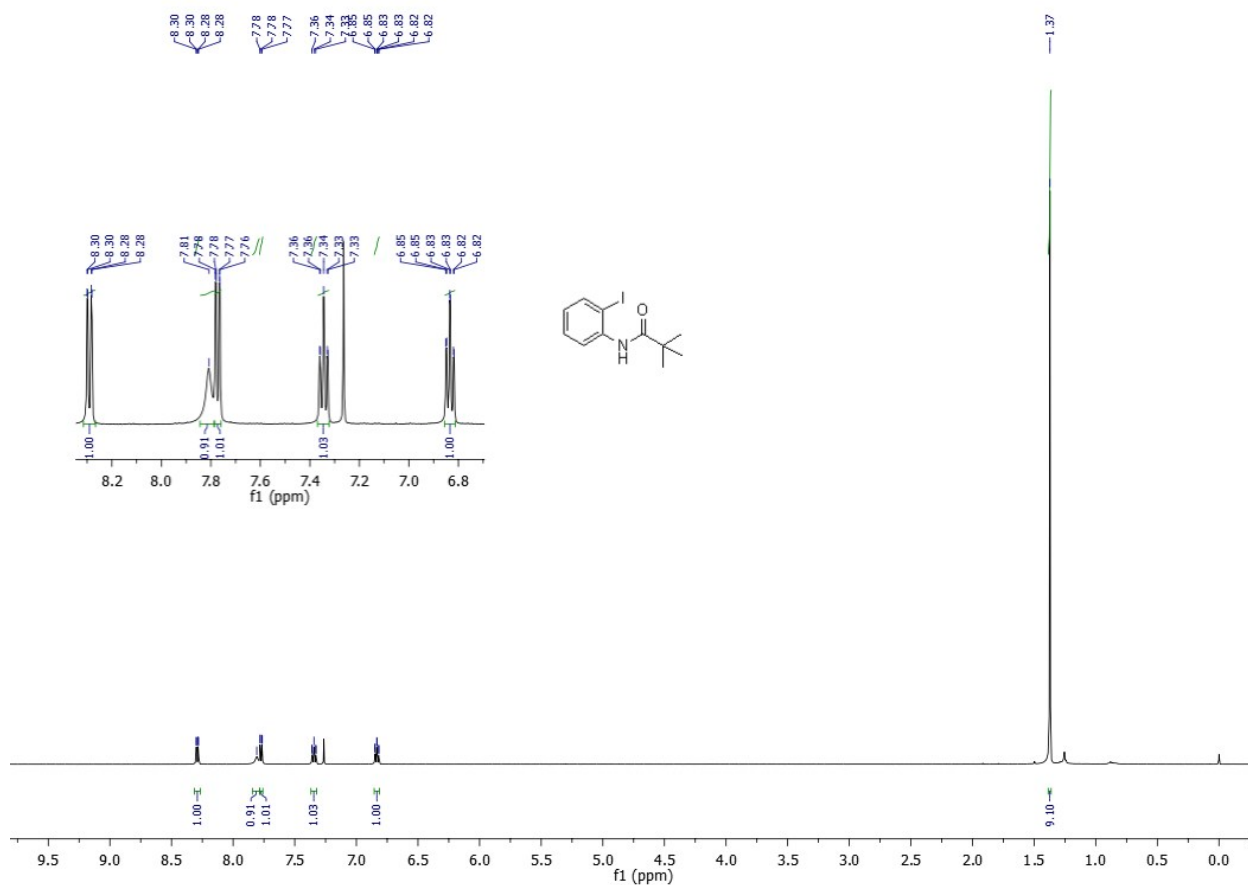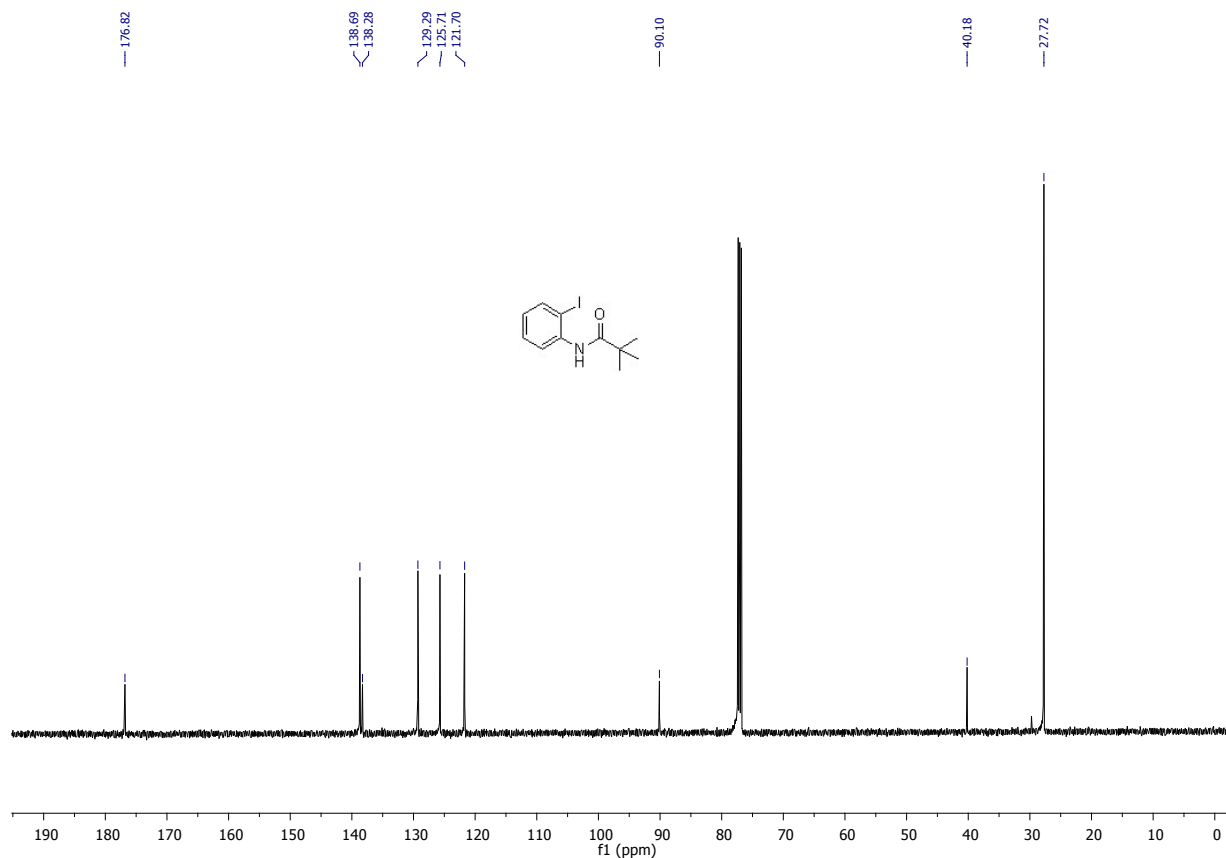

### N-(Pyridin-2-yl)pivalamide(2g): H<sup>1</sup> NMR

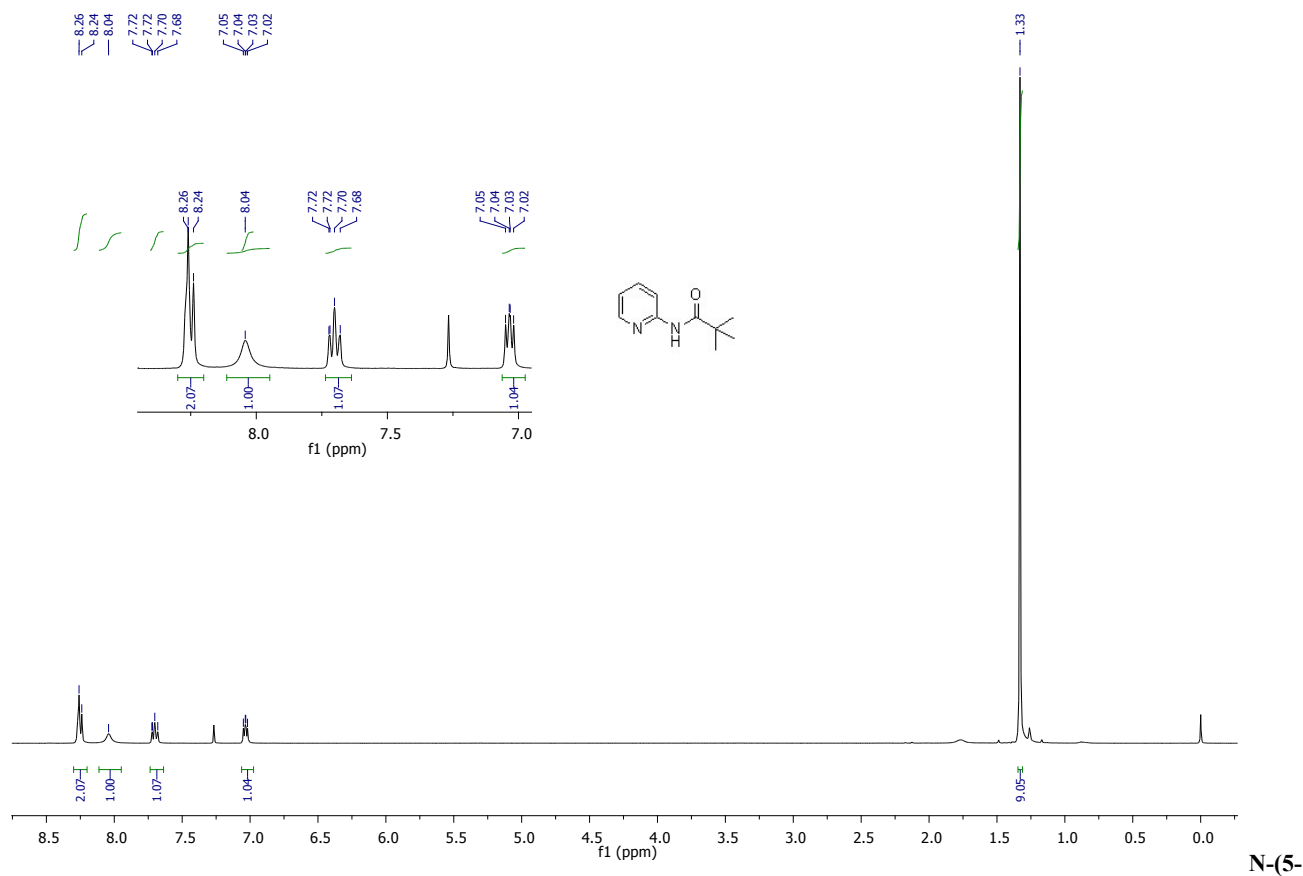

### Bromopyridin-2-yl)pivalamide(2h): H<sup>1</sup> NMR & C<sup>13</sup> NMR

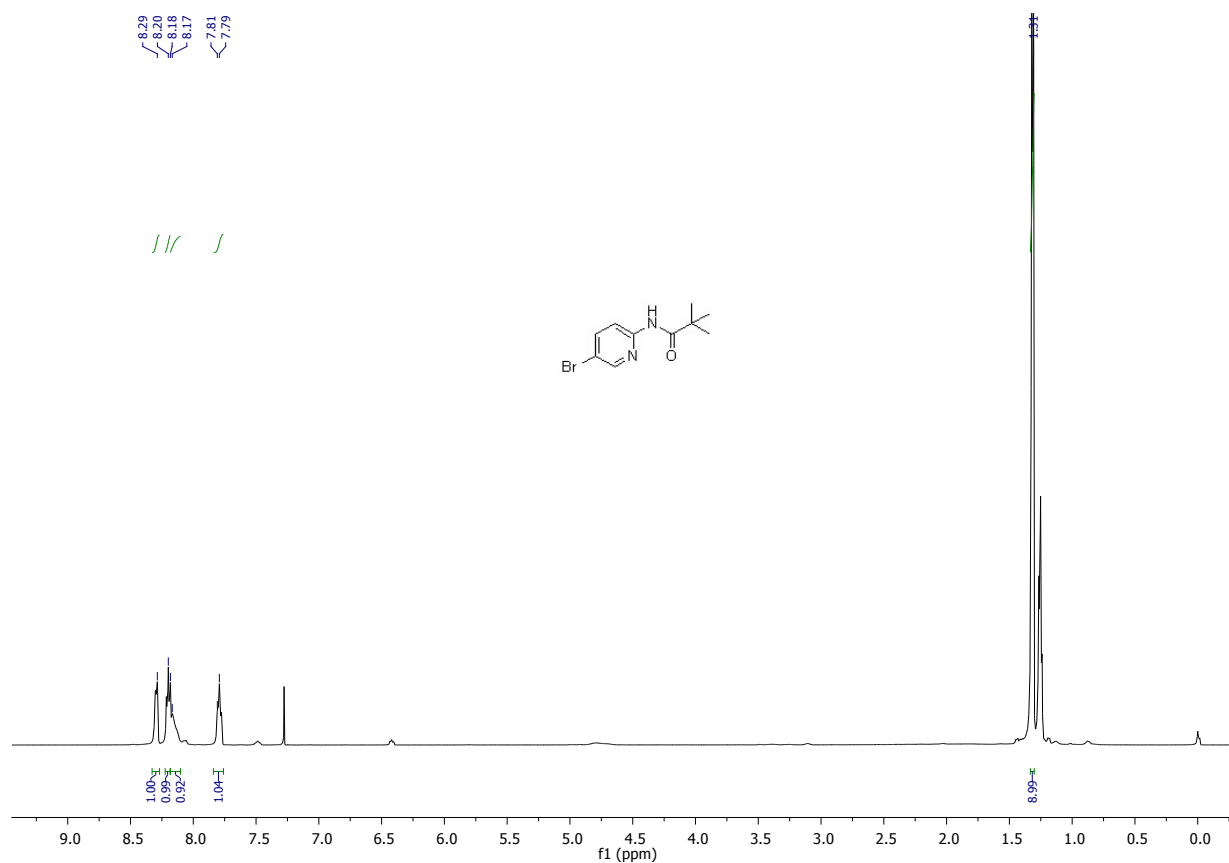

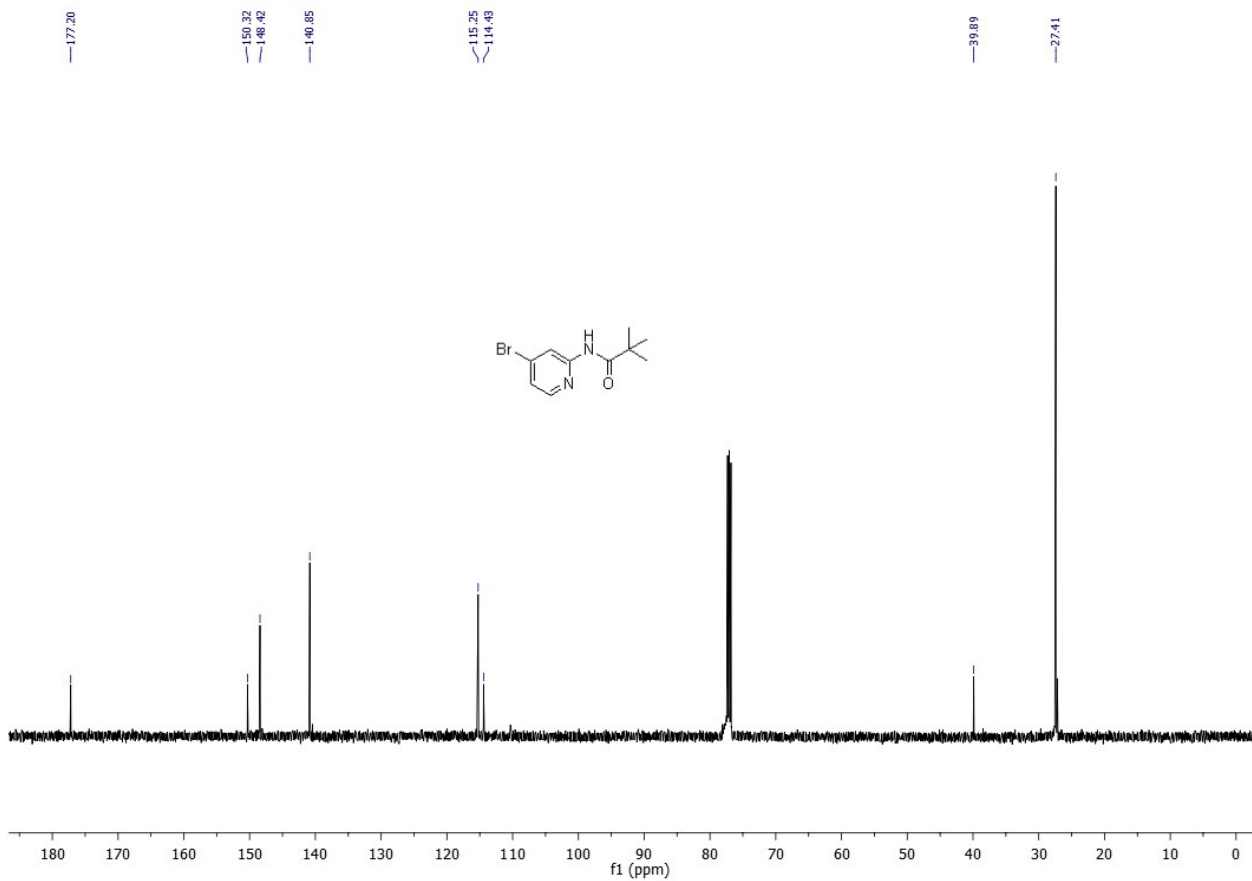

***N*-(2-Chloropyridin-3-yl)pivalamide(2i):  $H^1$  NMR**

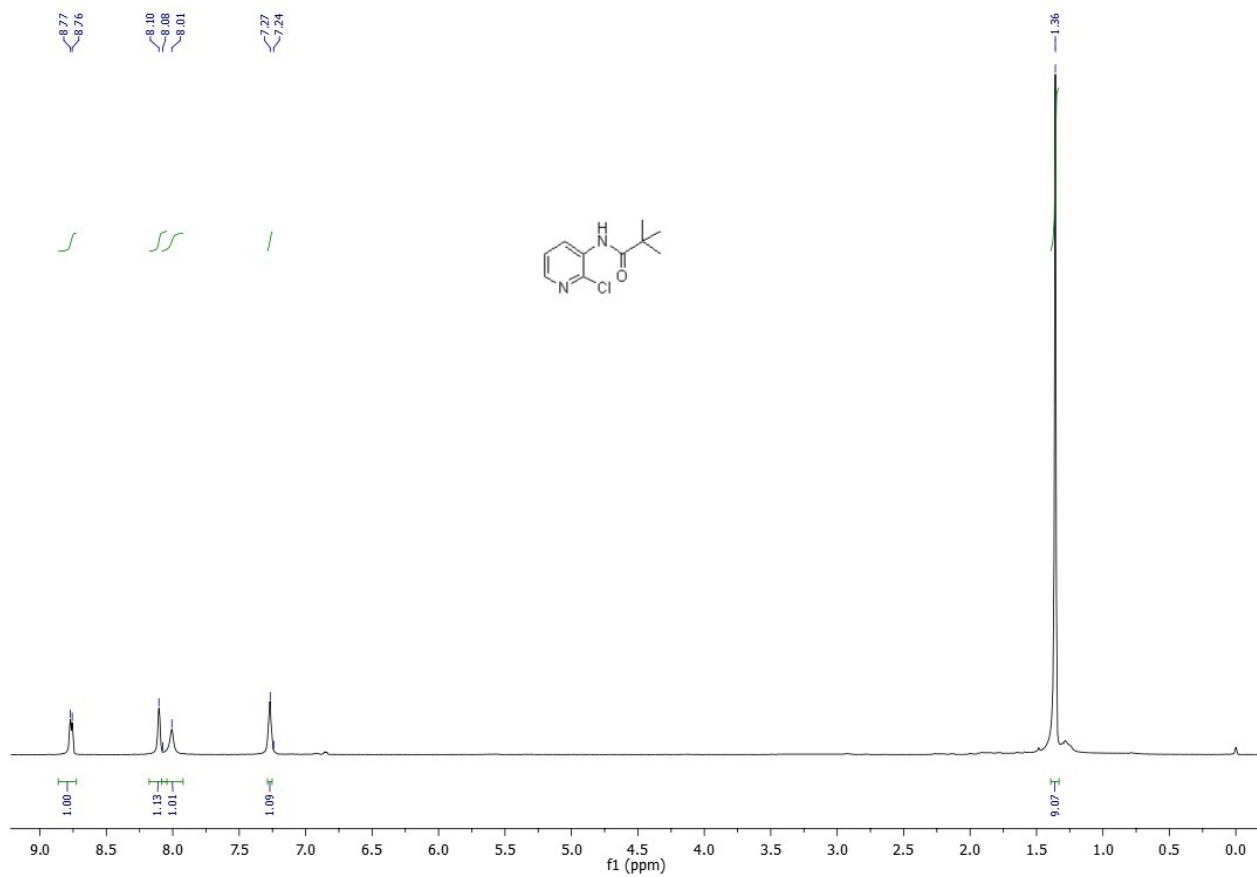

***N*-(Thiazol-2-yl)pivalamide(2j): H<sup>1</sup> NMR & C<sup>13</sup> NMR**

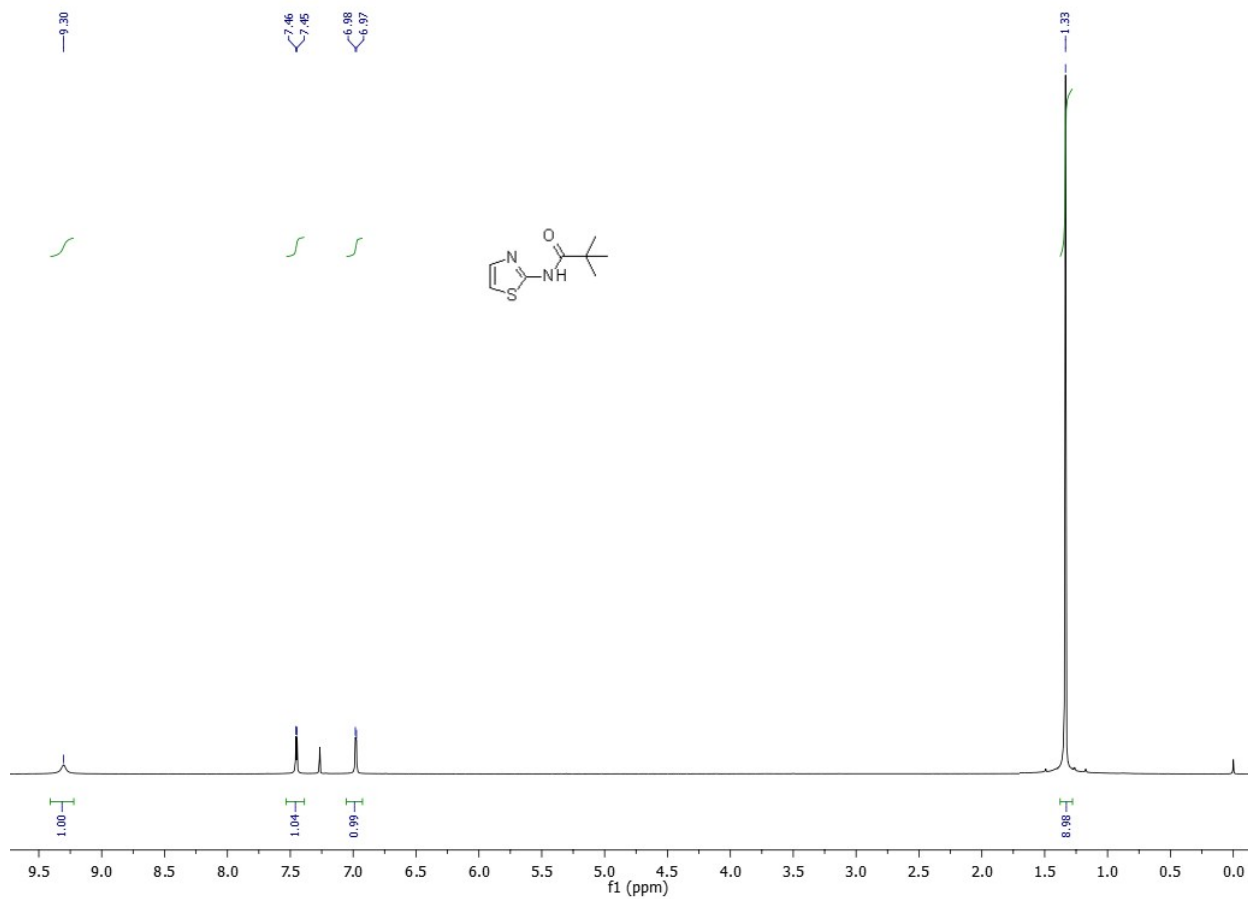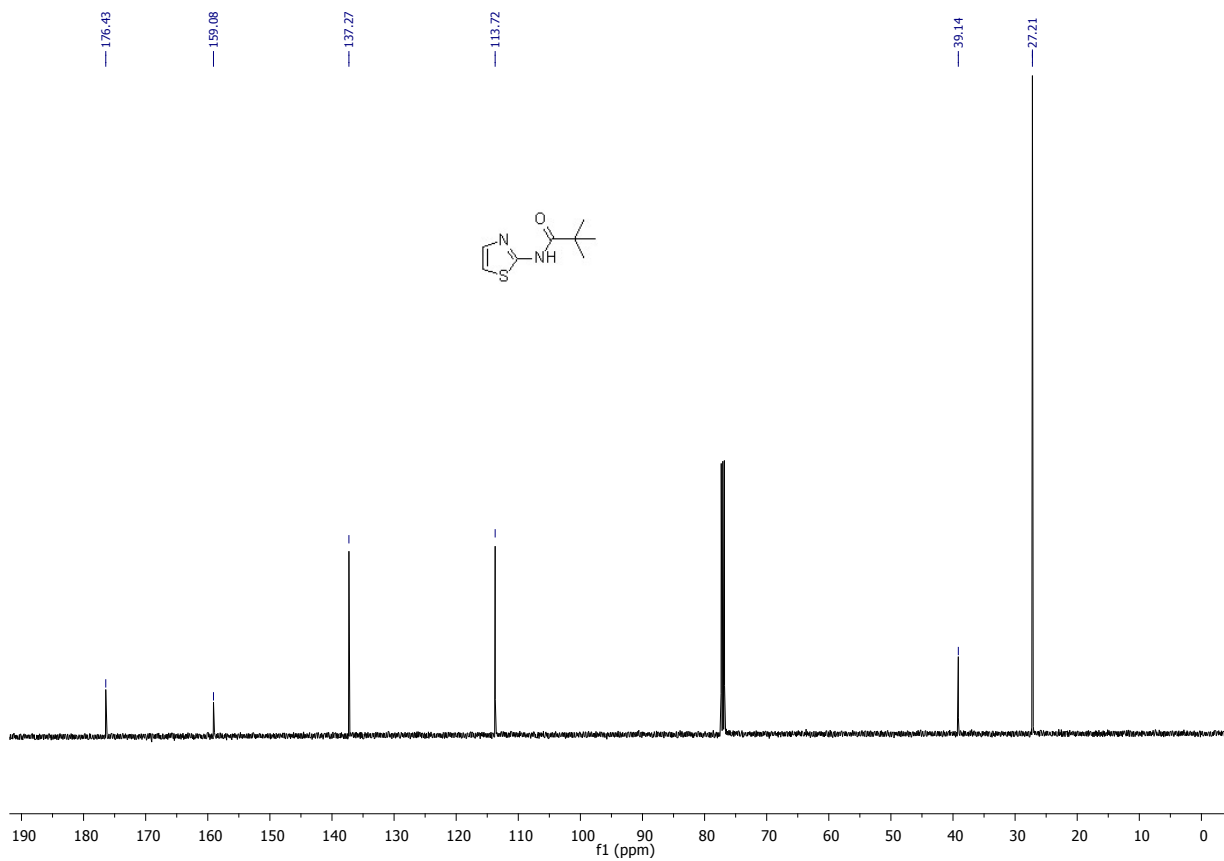

**N-Phenylformamide(3a): H<sup>1</sup> NMR & C<sup>13</sup> NMR**

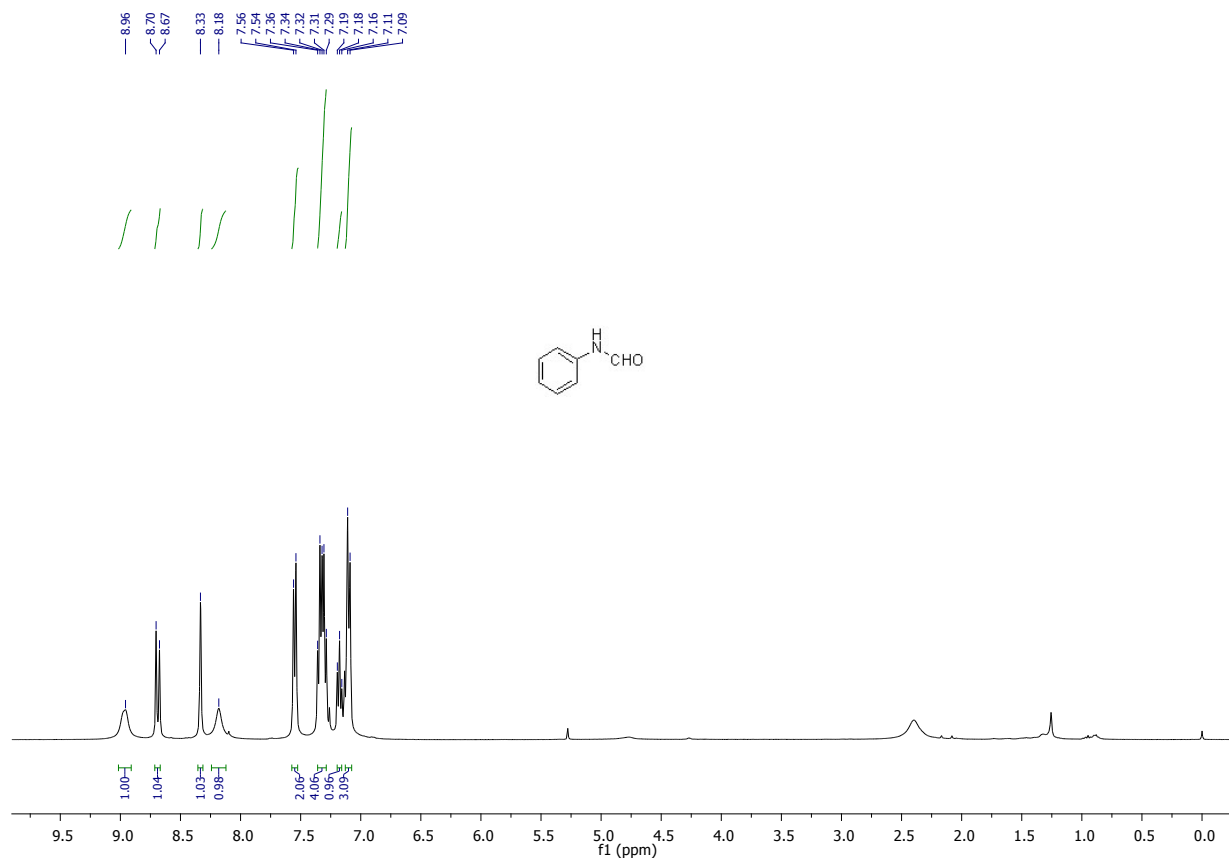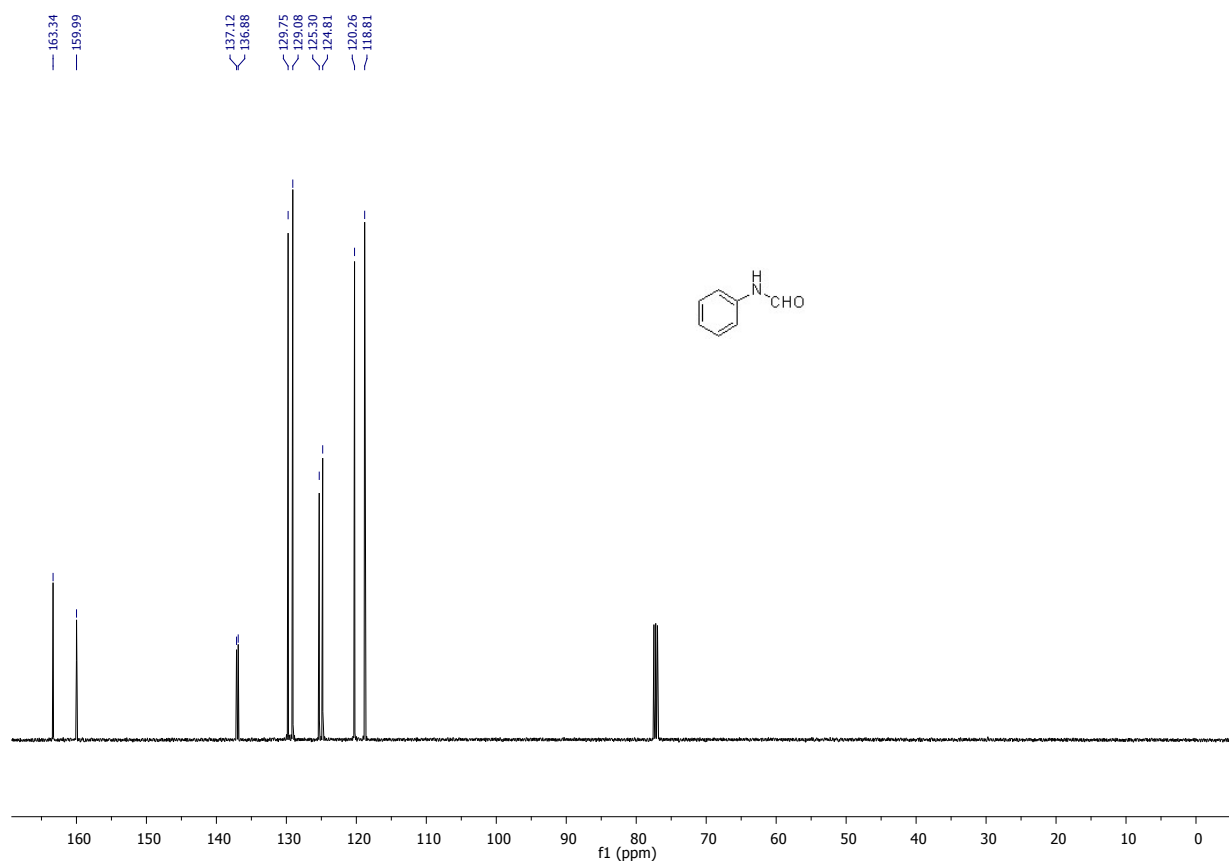

# Methyl 4-formamidobenzoate(3b): $H^1$ NMR & $C^{13}$ NMR

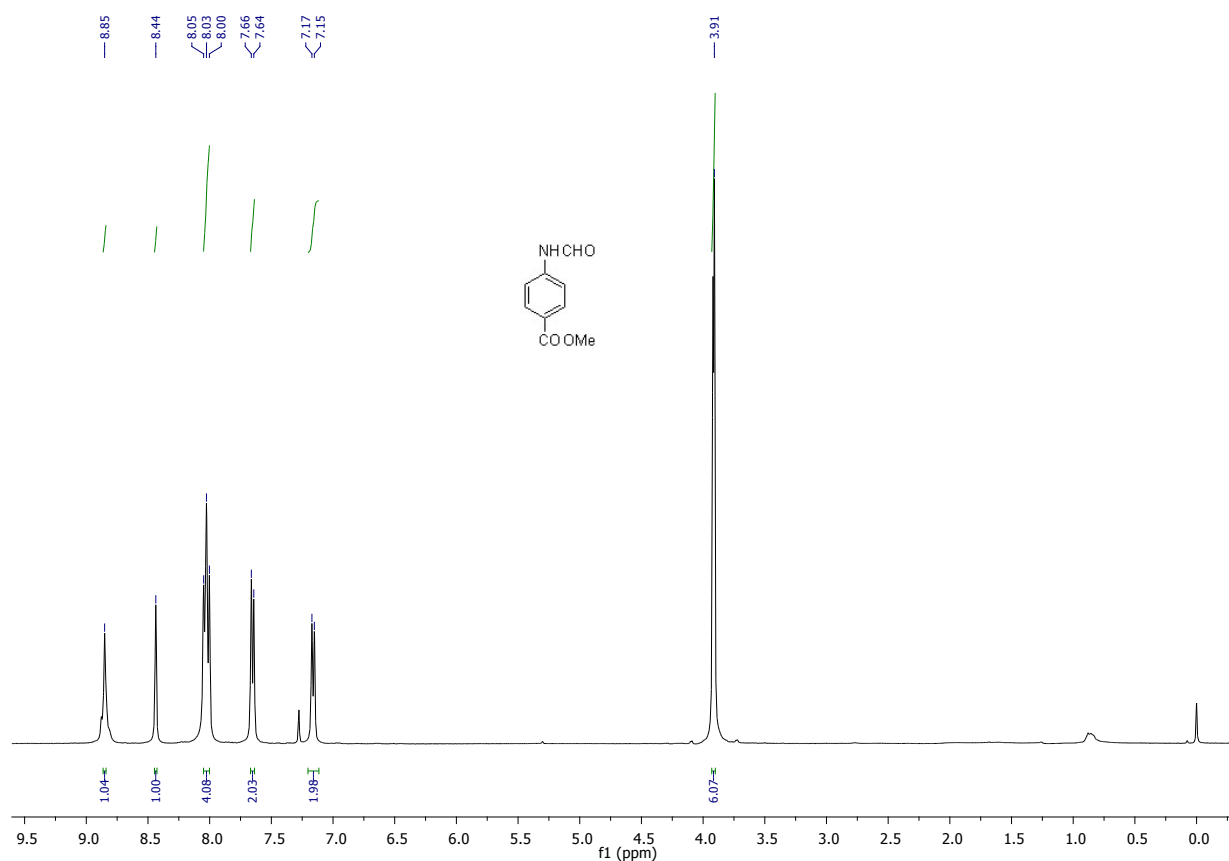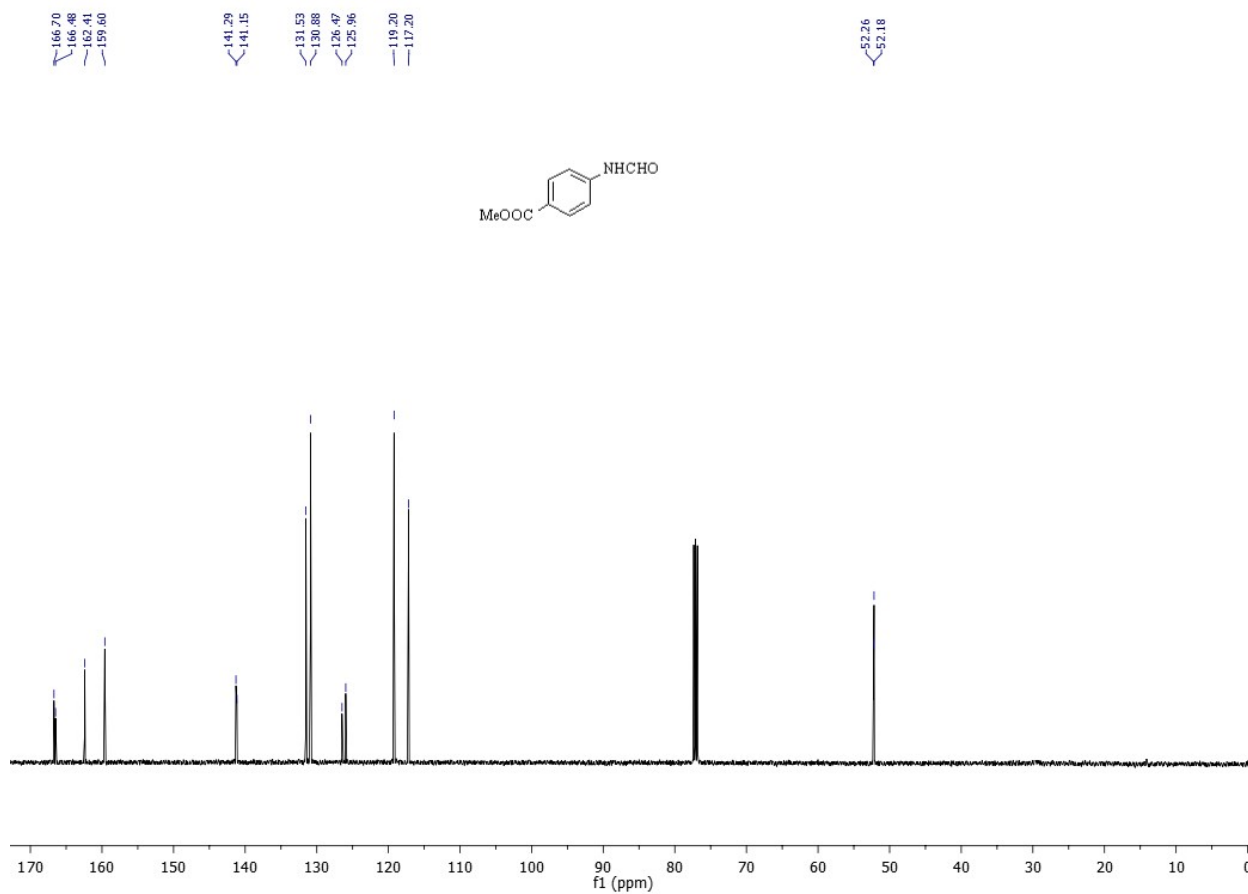



# Methyl 4-formamido-2-methoxybenzoate(3c): $^1\text{H}$ NMR & $^{13}\text{C}$ NMR

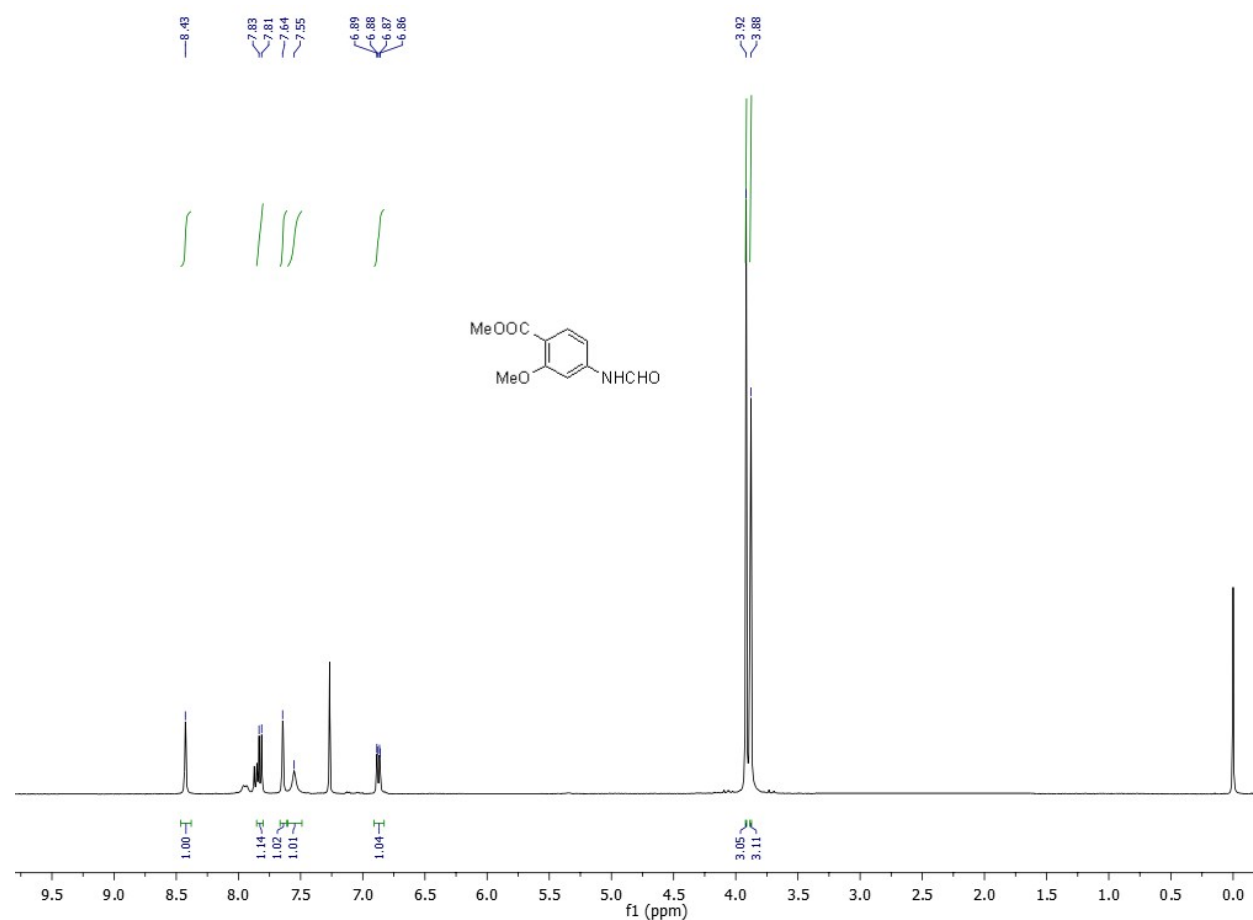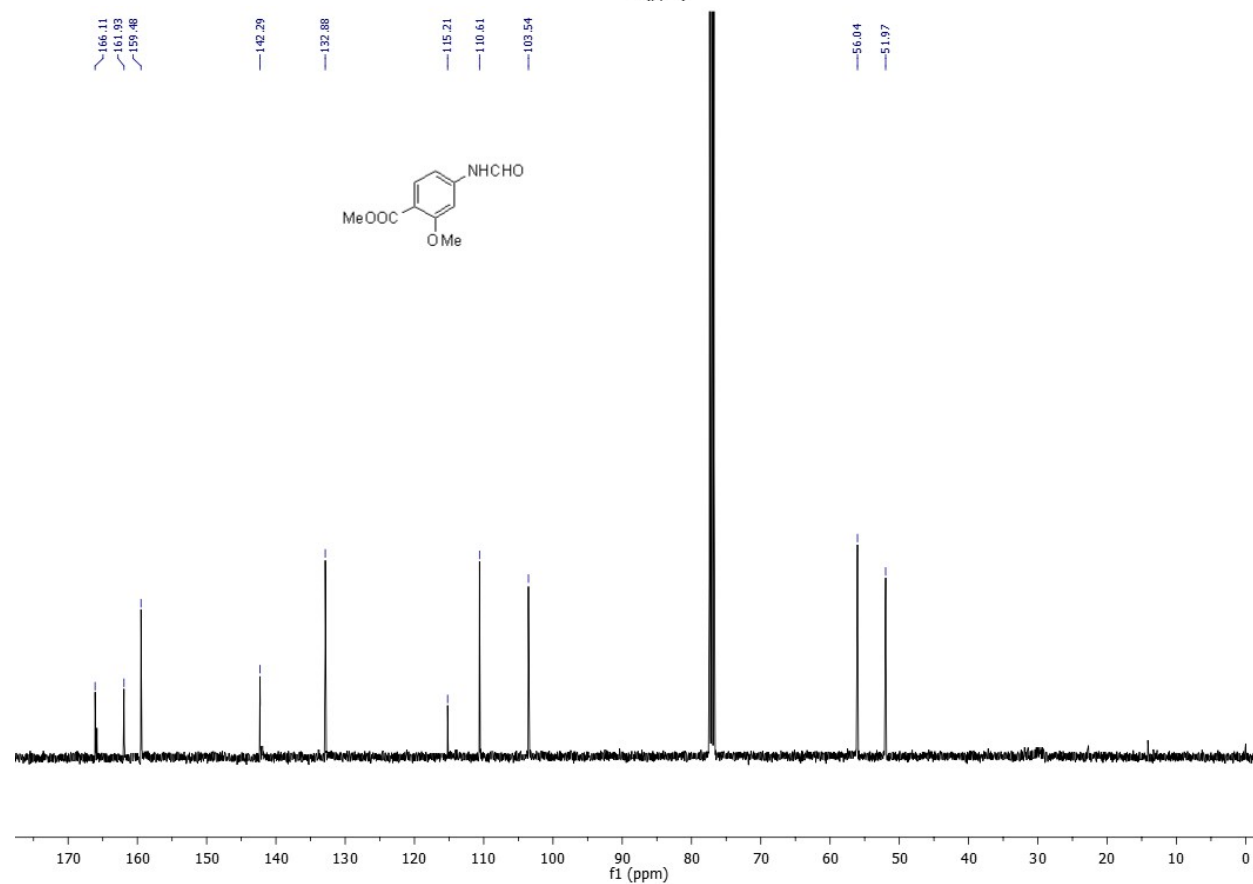

*N*-(2-Hydroxy-5-methylphenyl)formamide(3d):  $^1\text{H}$  NMR &  $^{13}\text{C}$  NMR

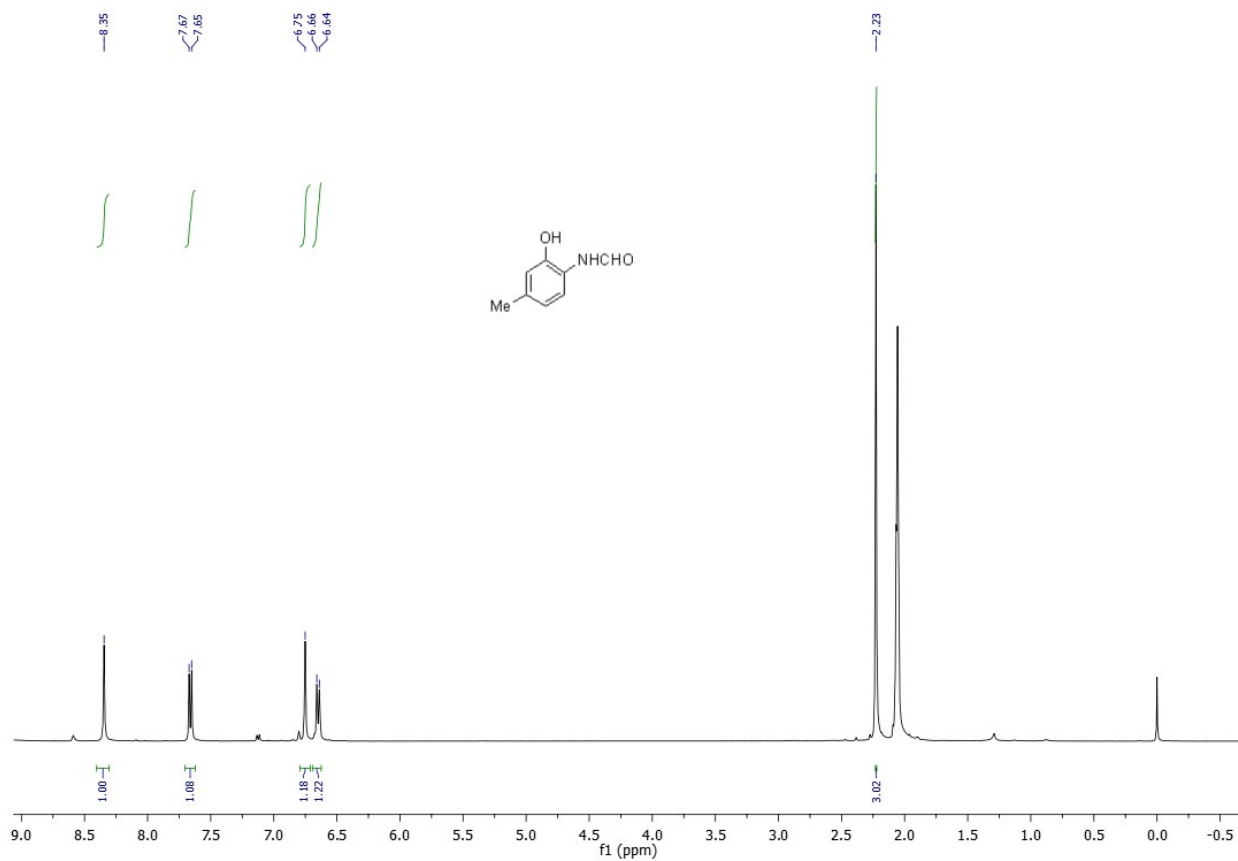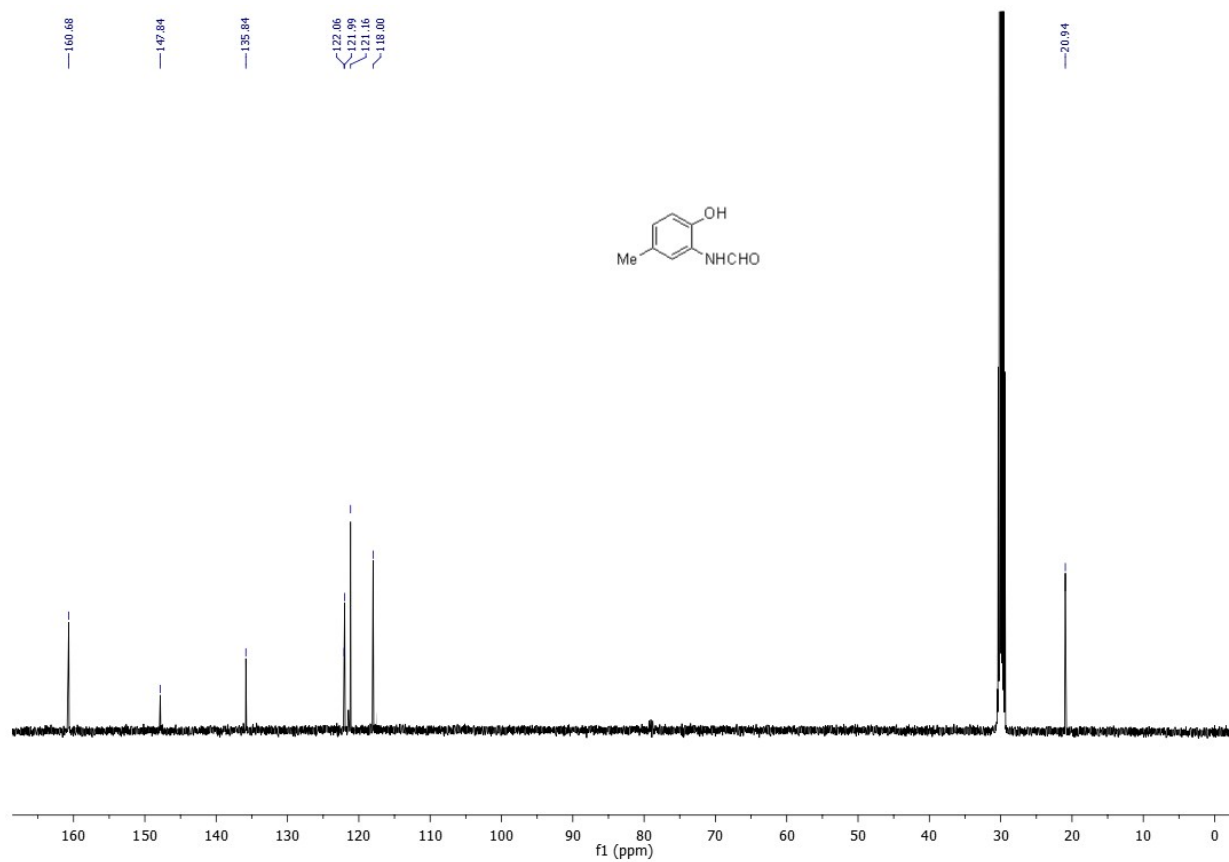

***N*-(2-Iodophenyl)formamide(3e):  $H^1$  NMR &  $C^{13}$  NMR**

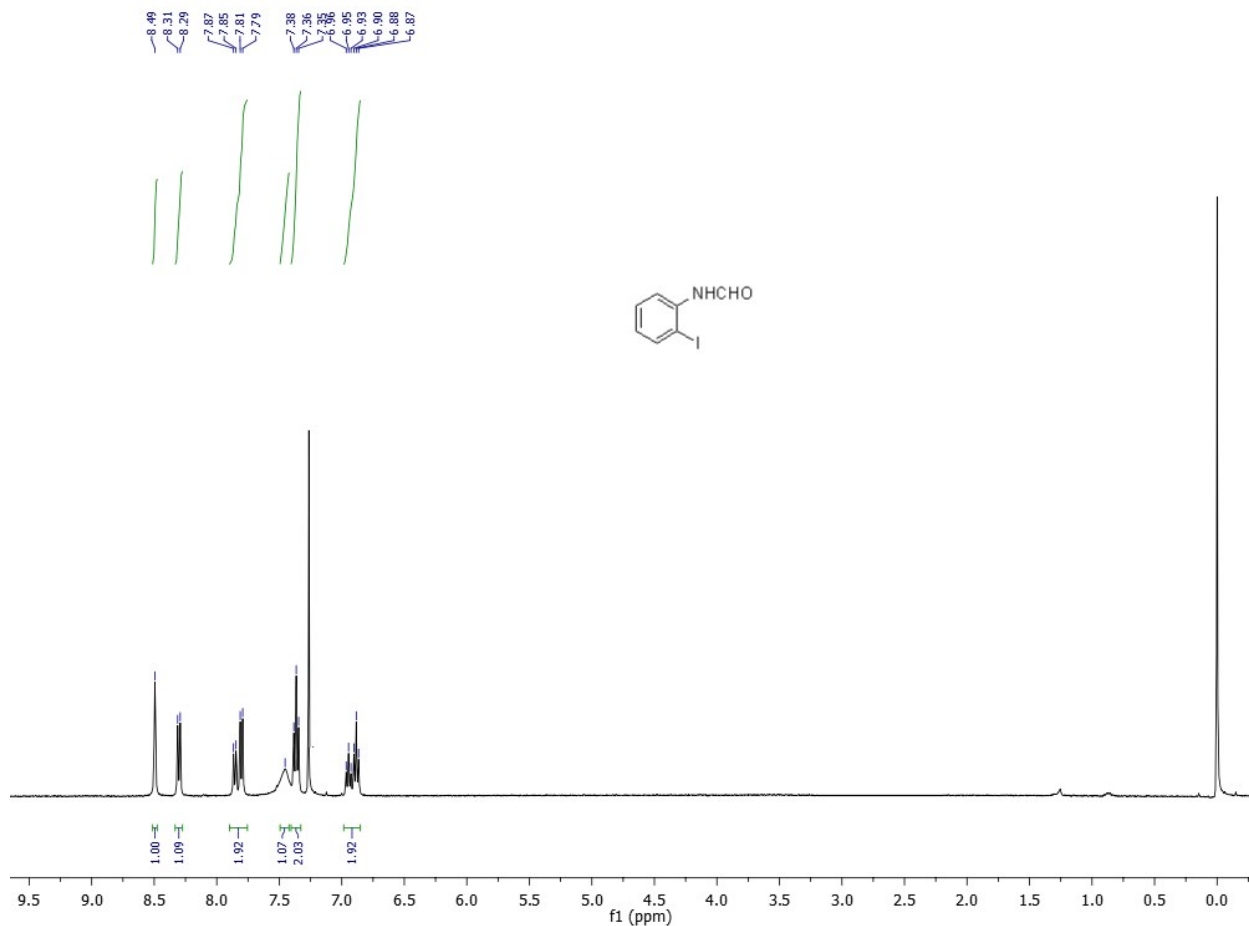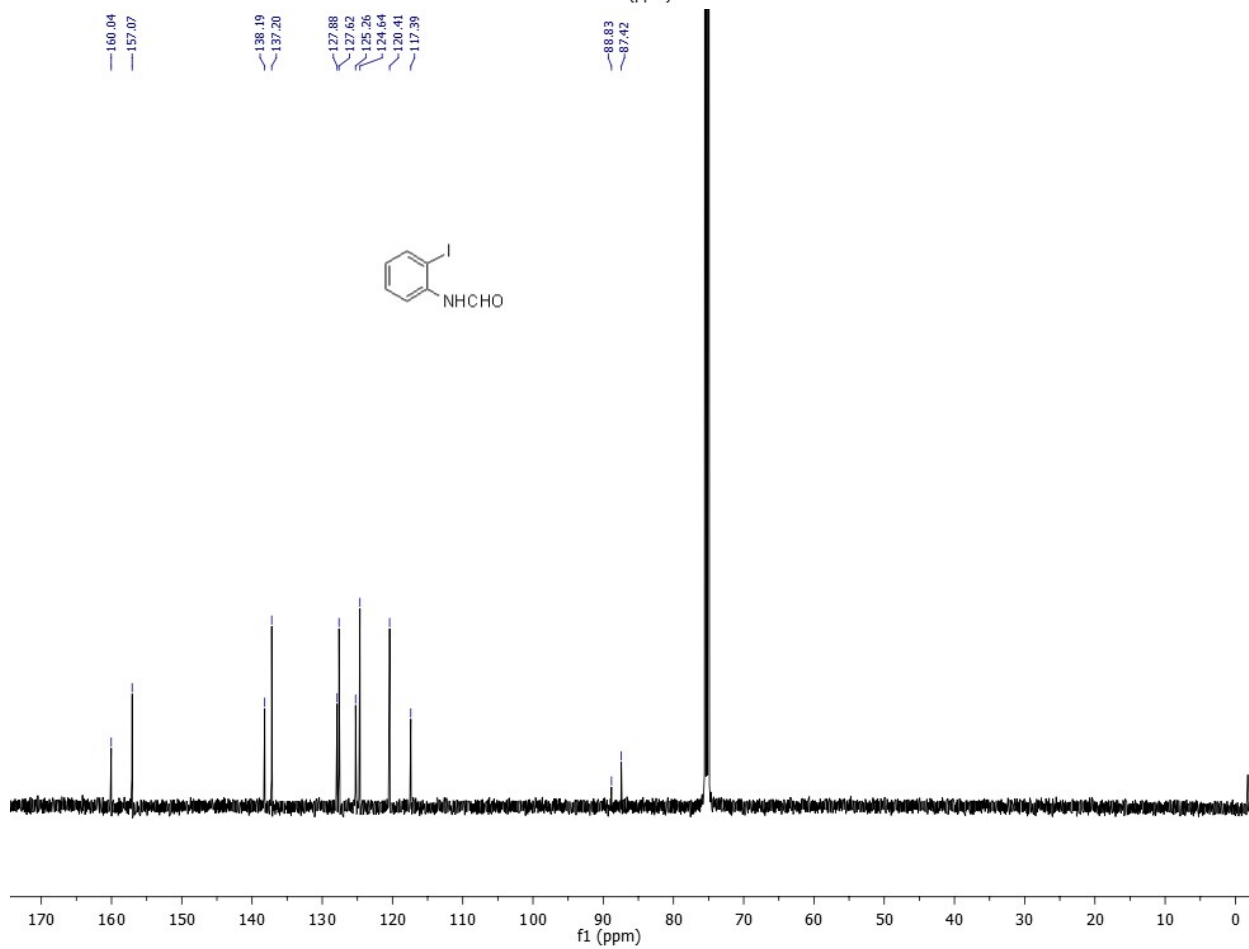

***N*-(Pyridin-3-yl)formamide(3f): H<sup>1</sup> NMR & C<sup>13</sup> NMR**

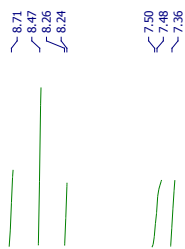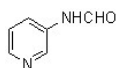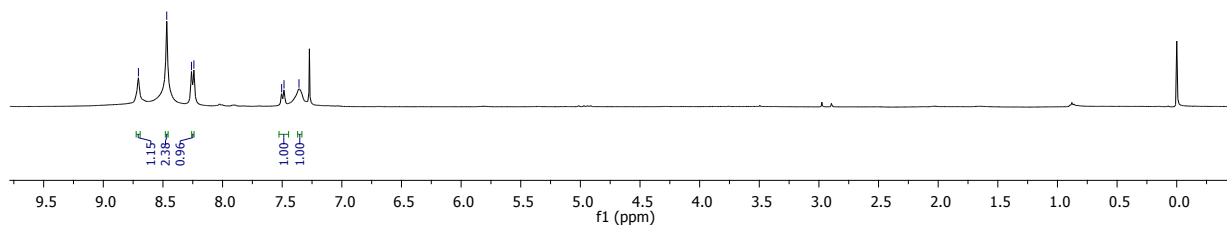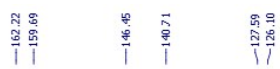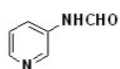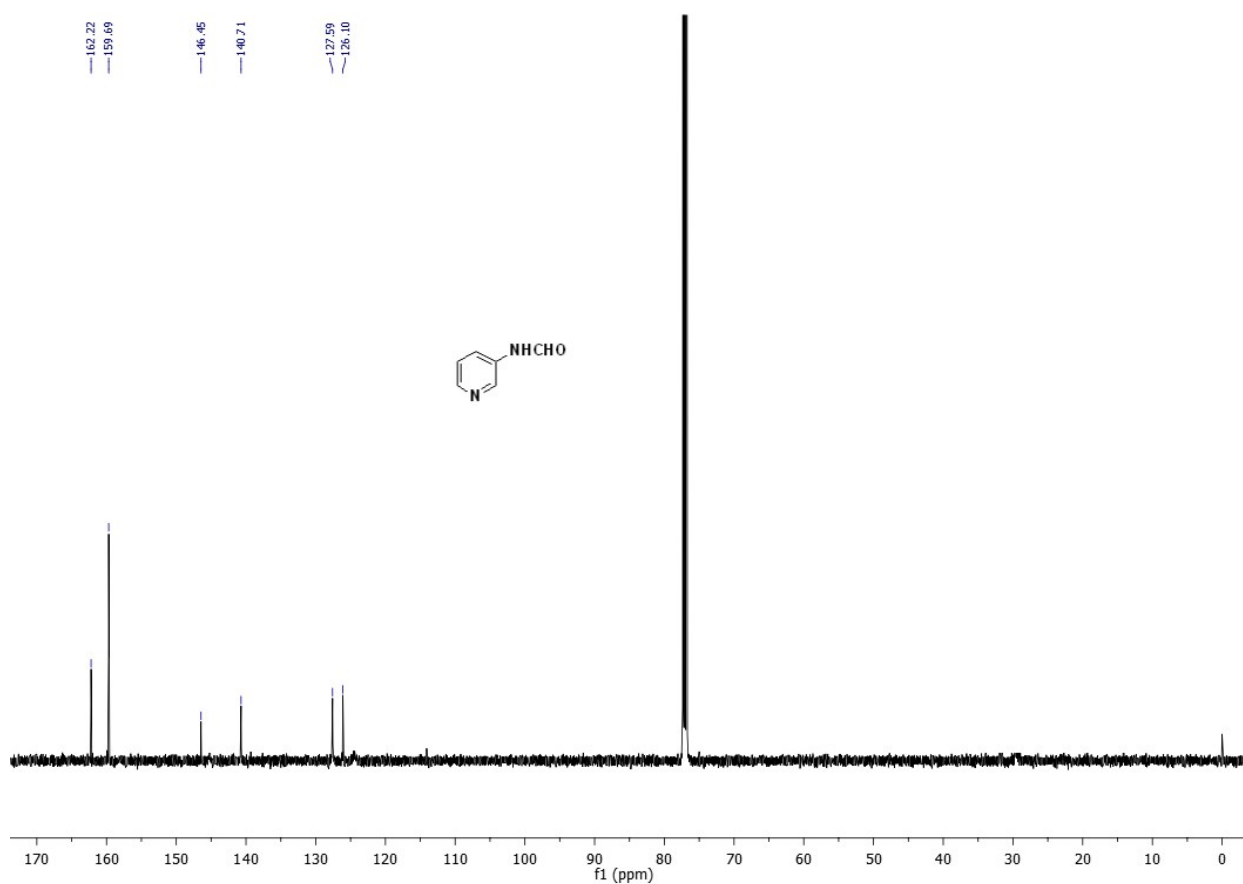

*N*-(2-Chloropyridin-3-yl)formamide(3g):  $H^1$  NMR &  $C^{13}$  NMR

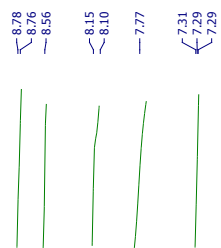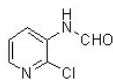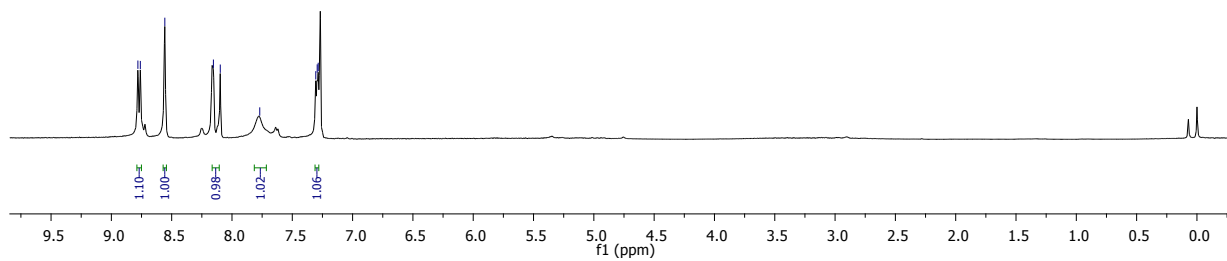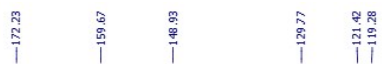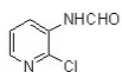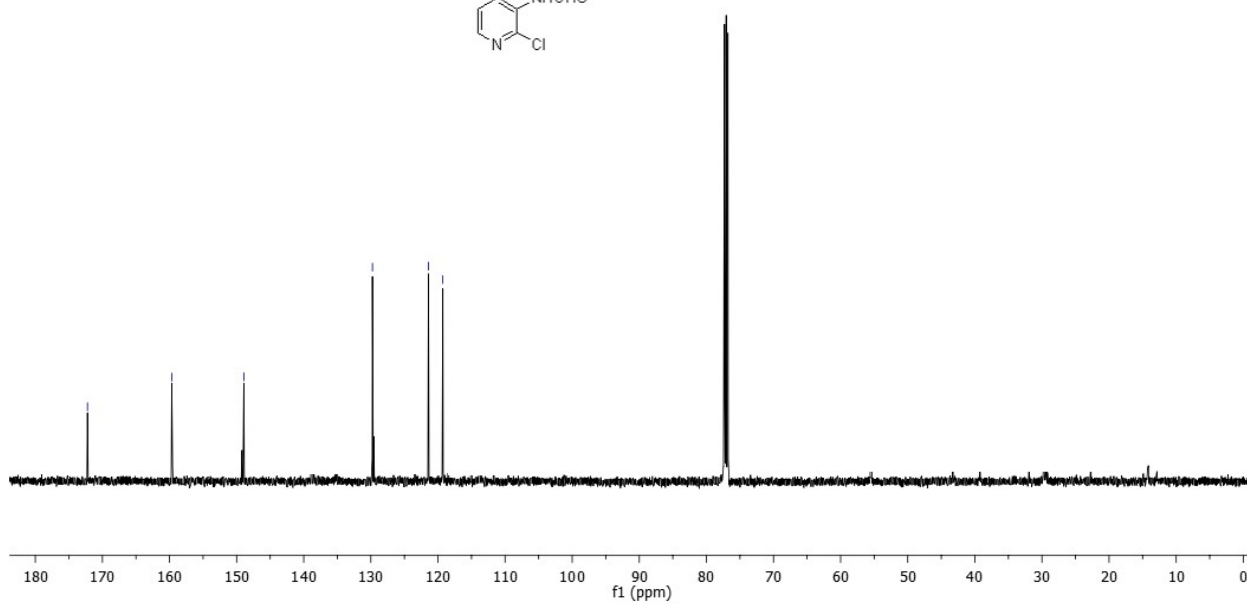

***N*-(5-Bromopyridin-2-yl)formamide(3h):  $H^1$  NMR &  $C^{13}$  NMR**

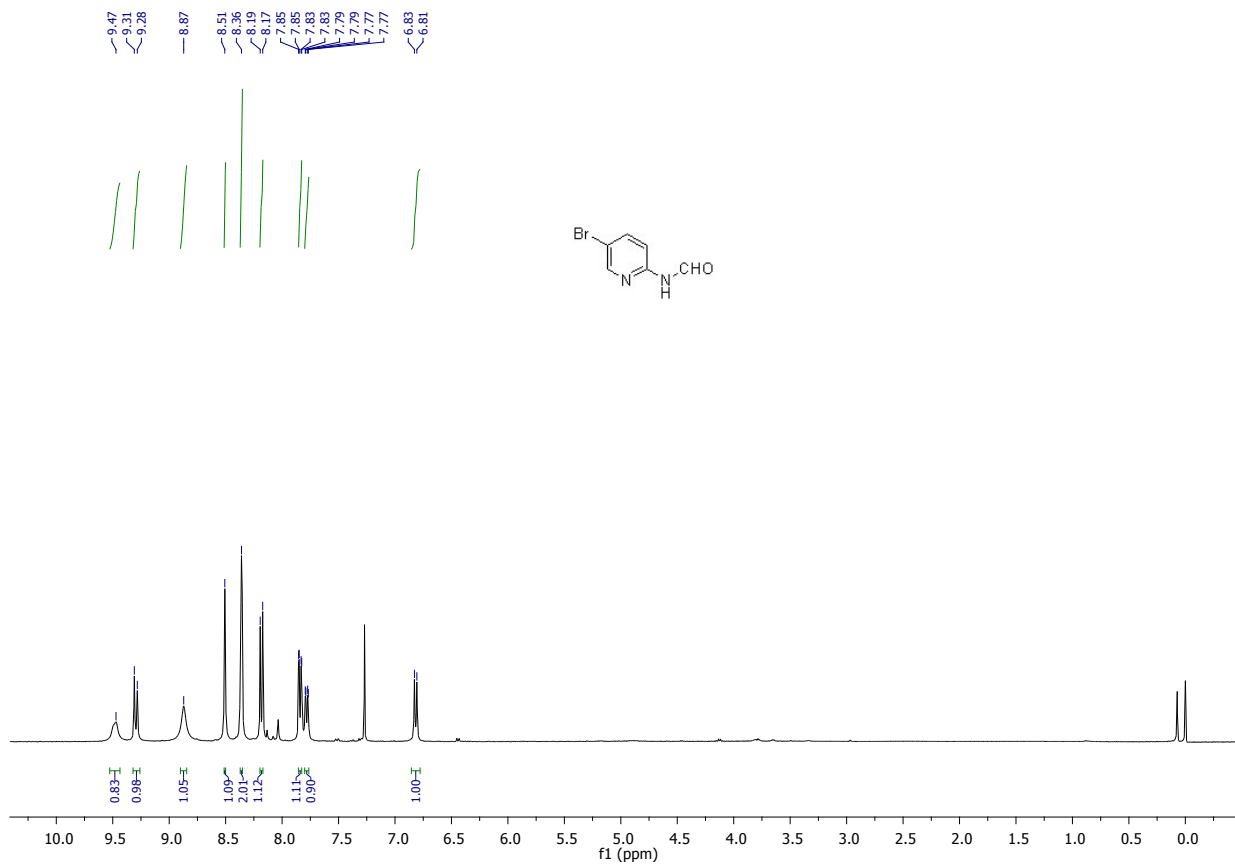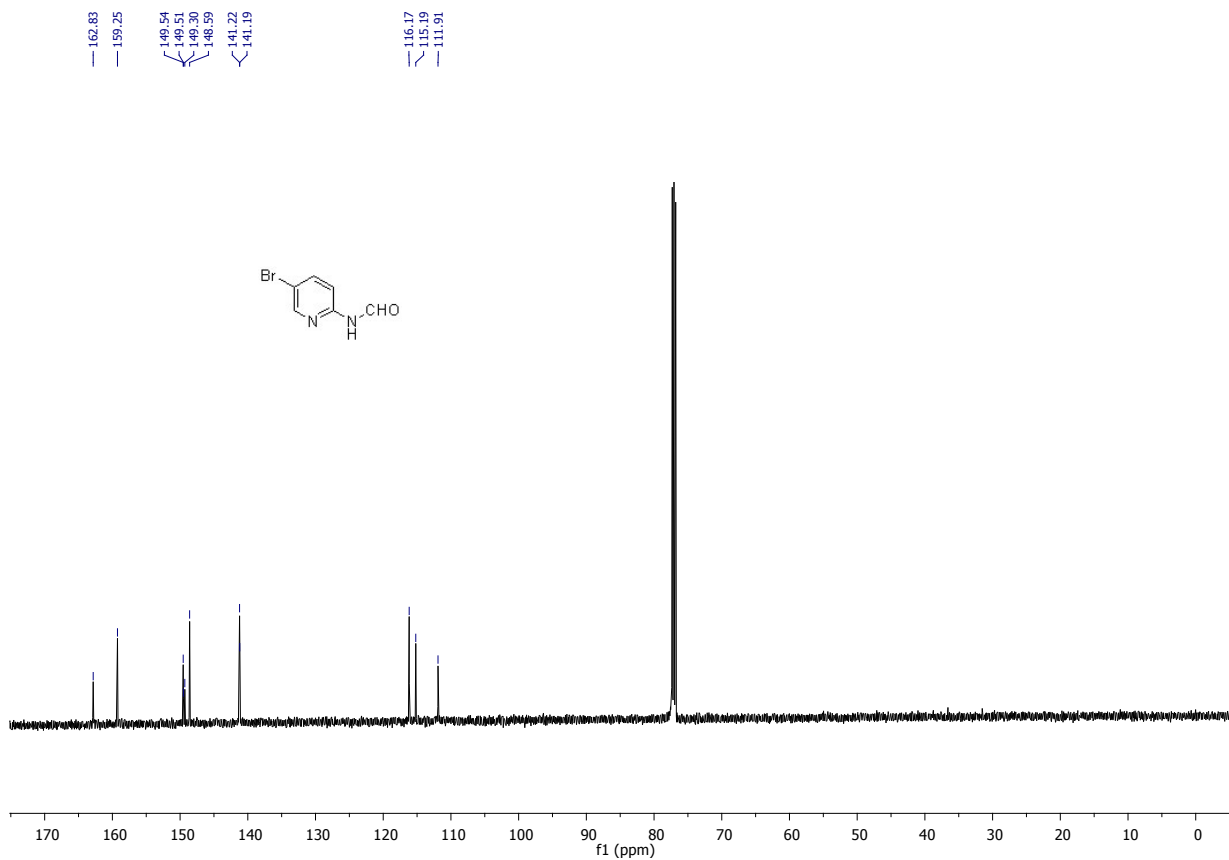

*N*-(Thiazol-2-yl)formamide(3i): H<sup>1</sup> NMR & C<sup>13</sup> NMR

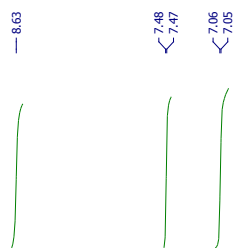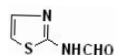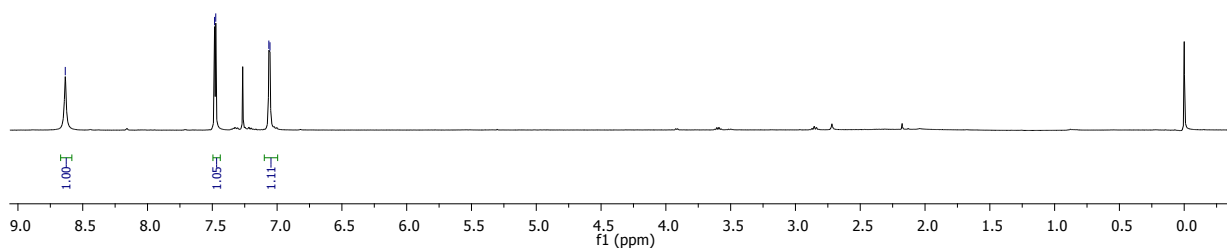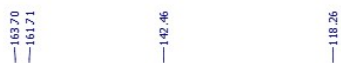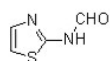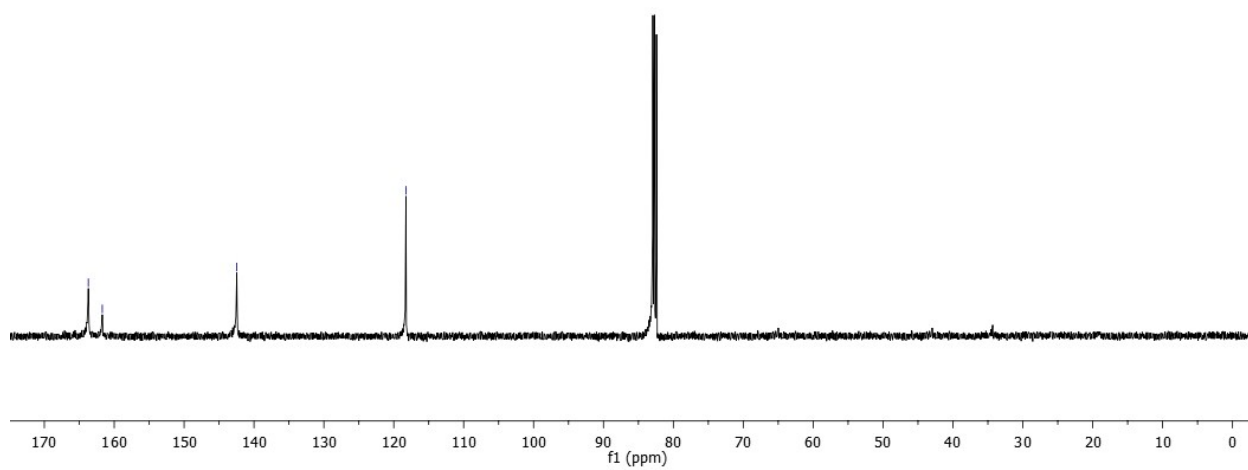

**N-Phenethylformamide(3j): H<sup>1</sup> NMR & C<sup>13</sup> NMR**

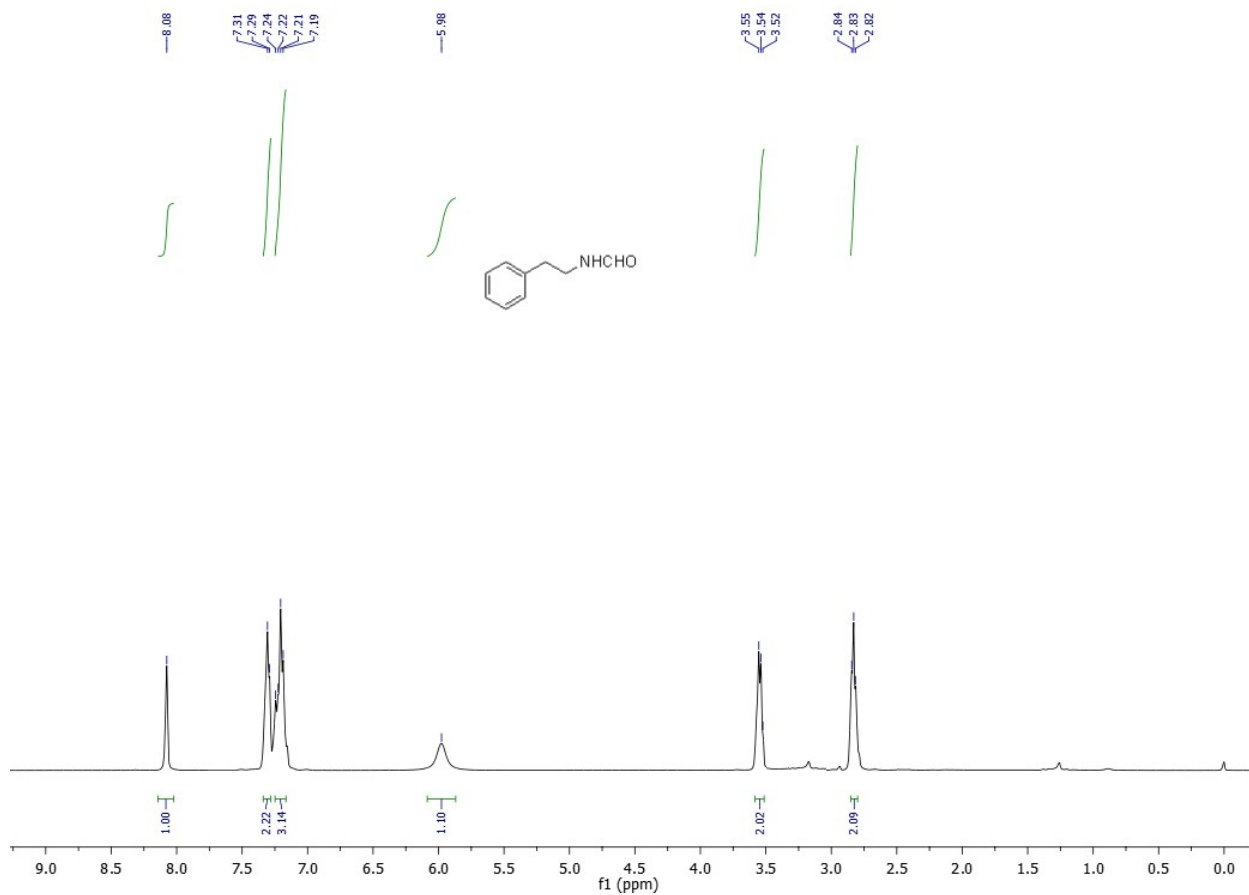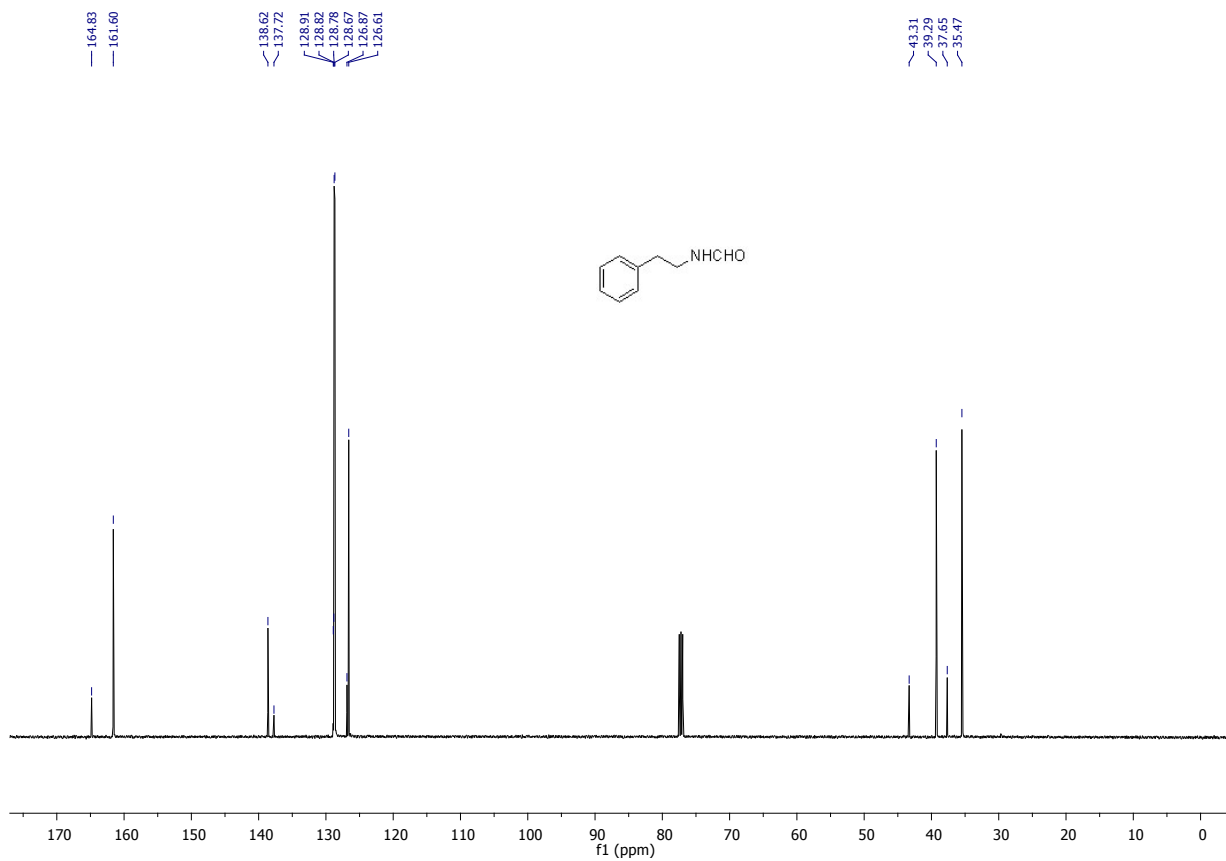



Methyl 2-formamido-3-(1H-indol-3-yl)propanoate(3k):  $H^1$  NMR &  $C^{13}$  NMR

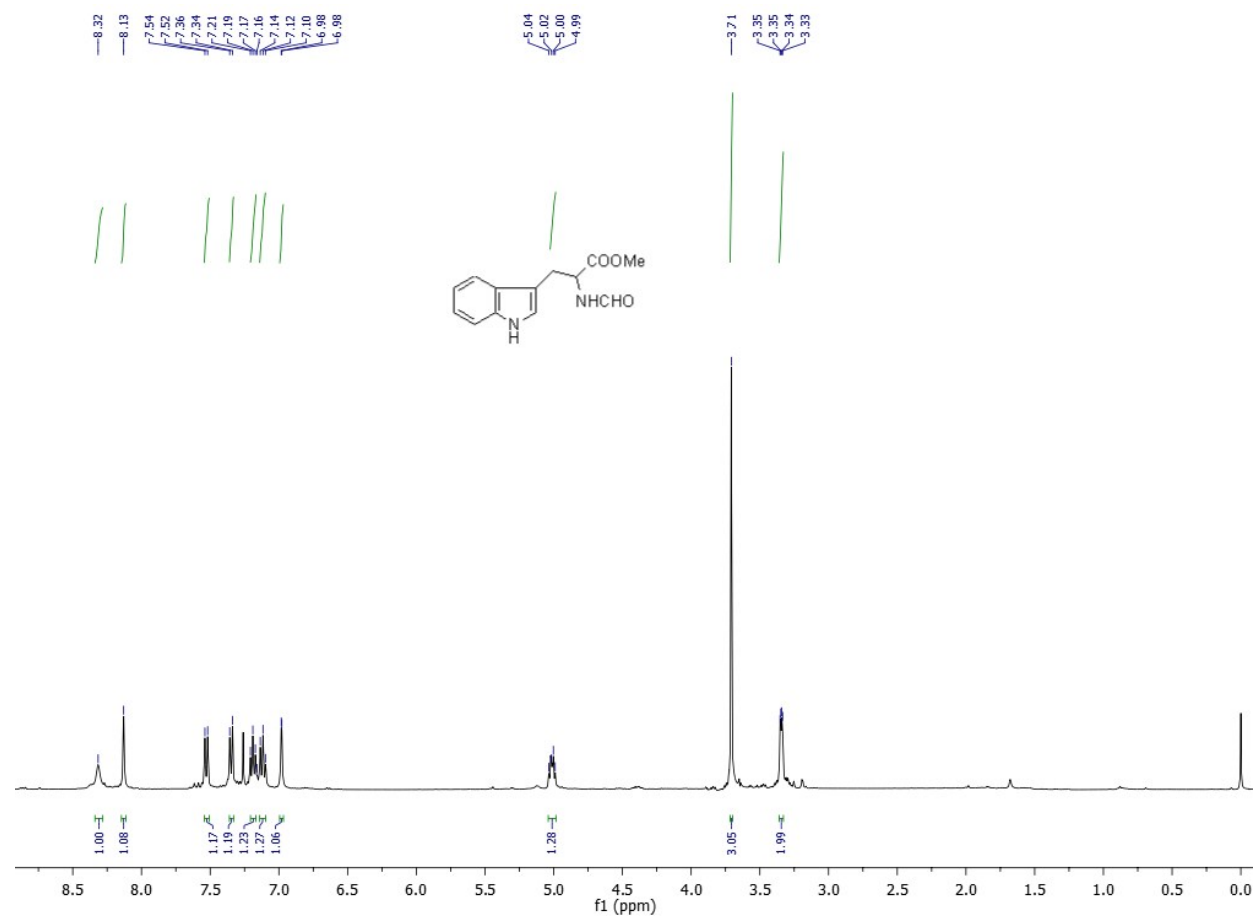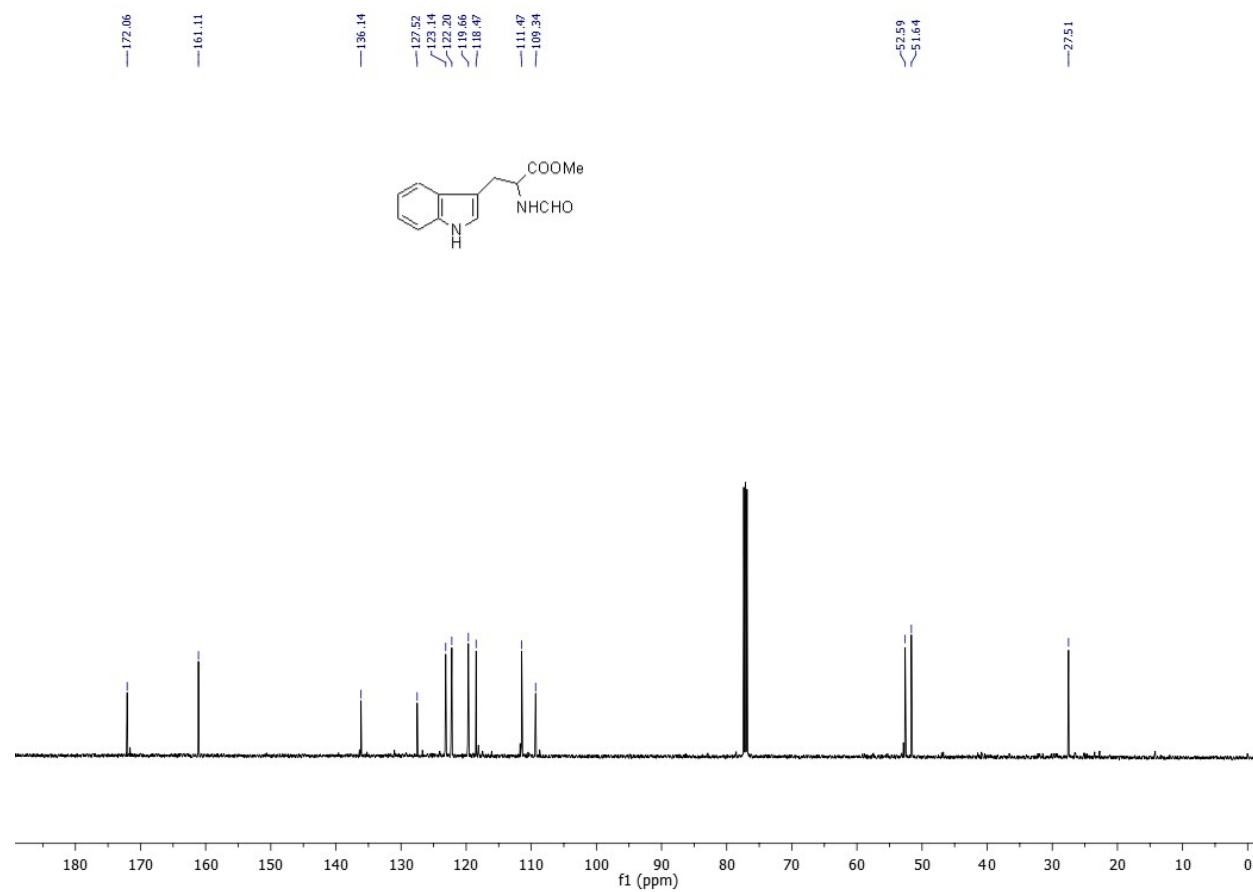

### Piperidine-1-carbaldehyde(3l): H<sup>1</sup> NMR

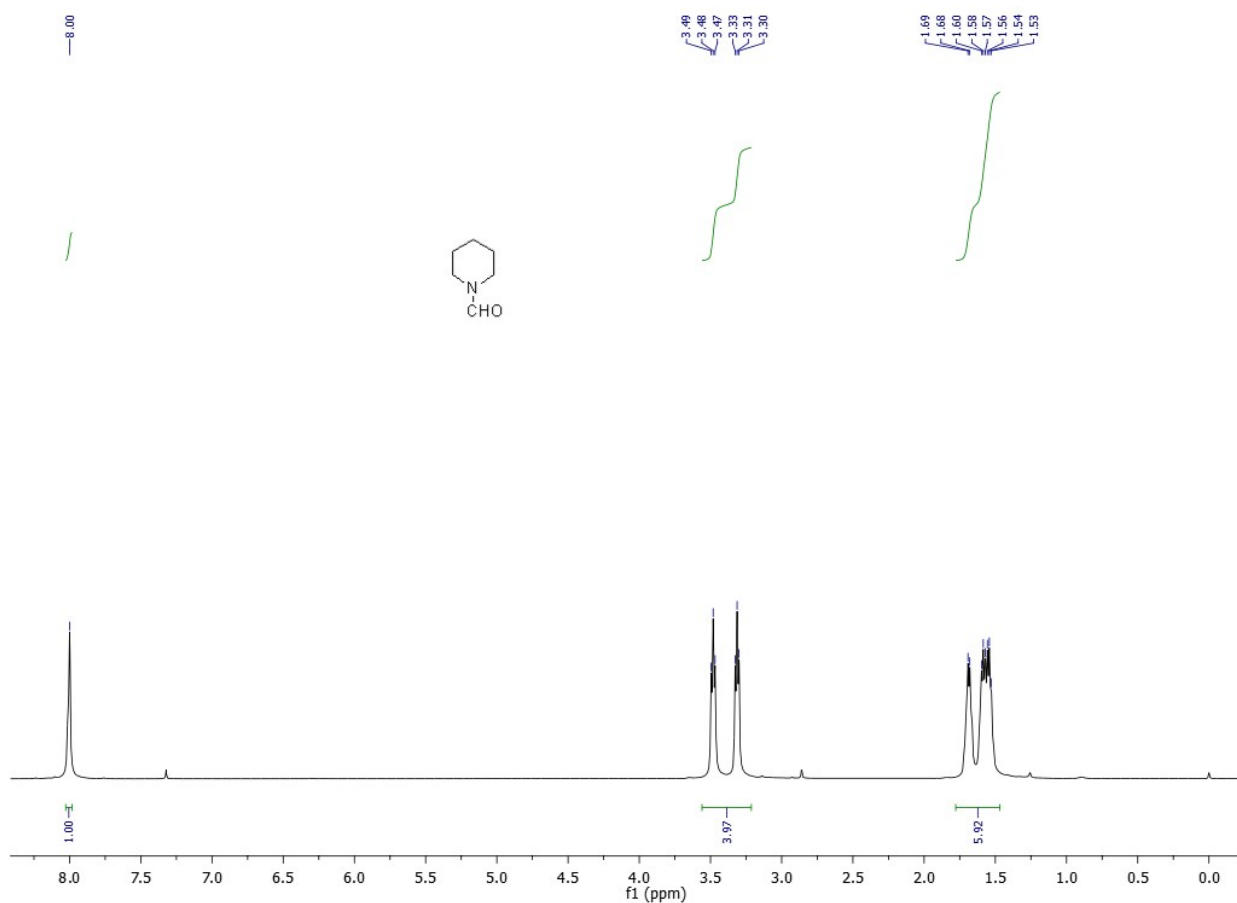

### Morpholine-4-carbaldehyde(3m): H<sup>1</sup> NMR

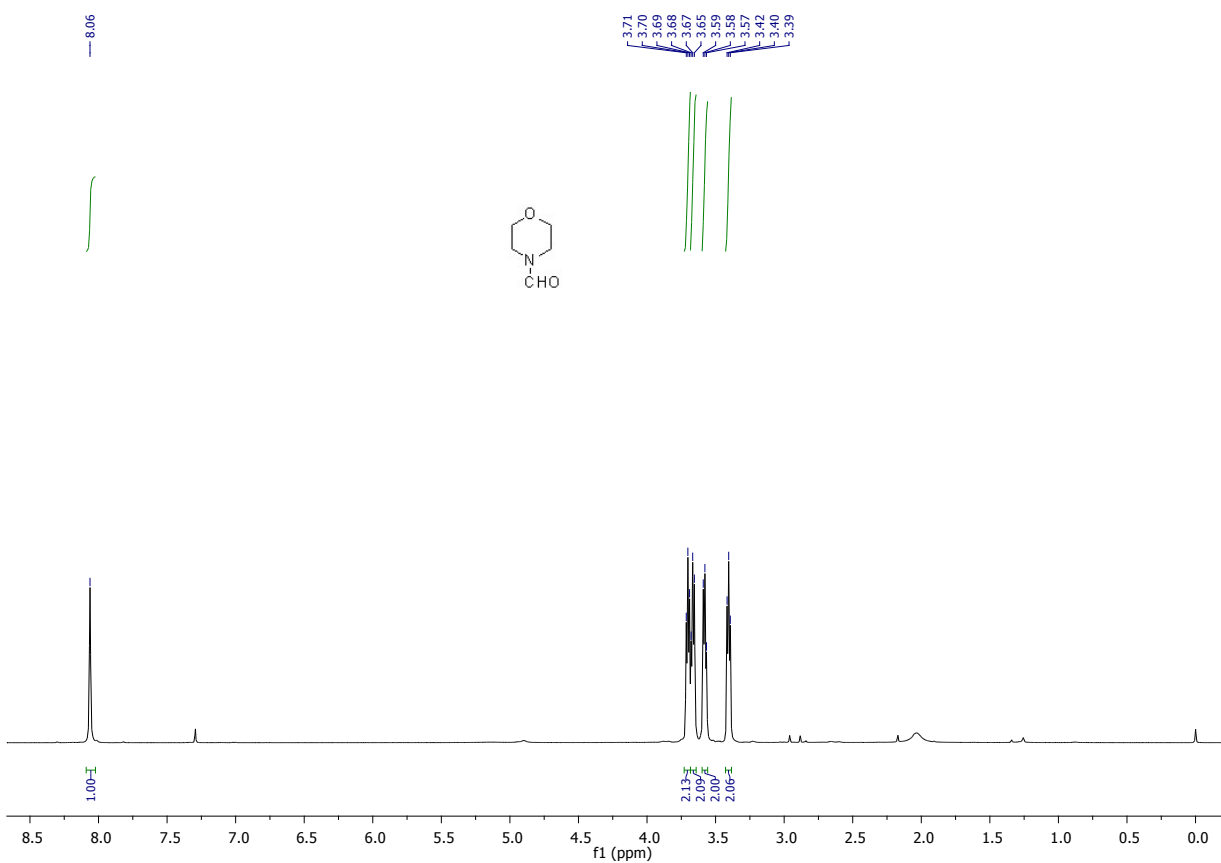

***N*-(*p*-Tolyl)acetamide(3n): H<sup>1</sup> NMR**

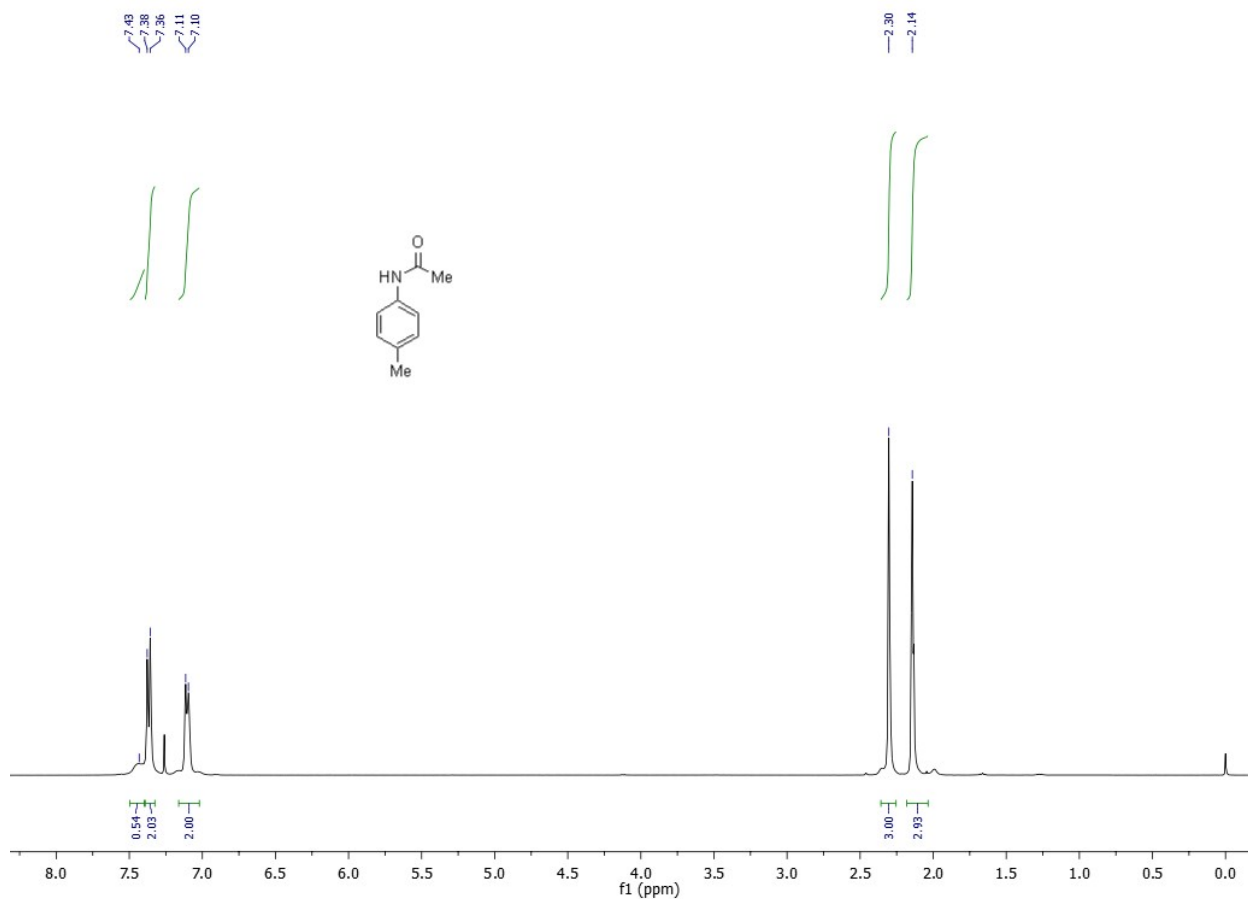

***N*-(4-Methoxyphenyl)acetamide(3o): H<sup>1</sup> NMR**

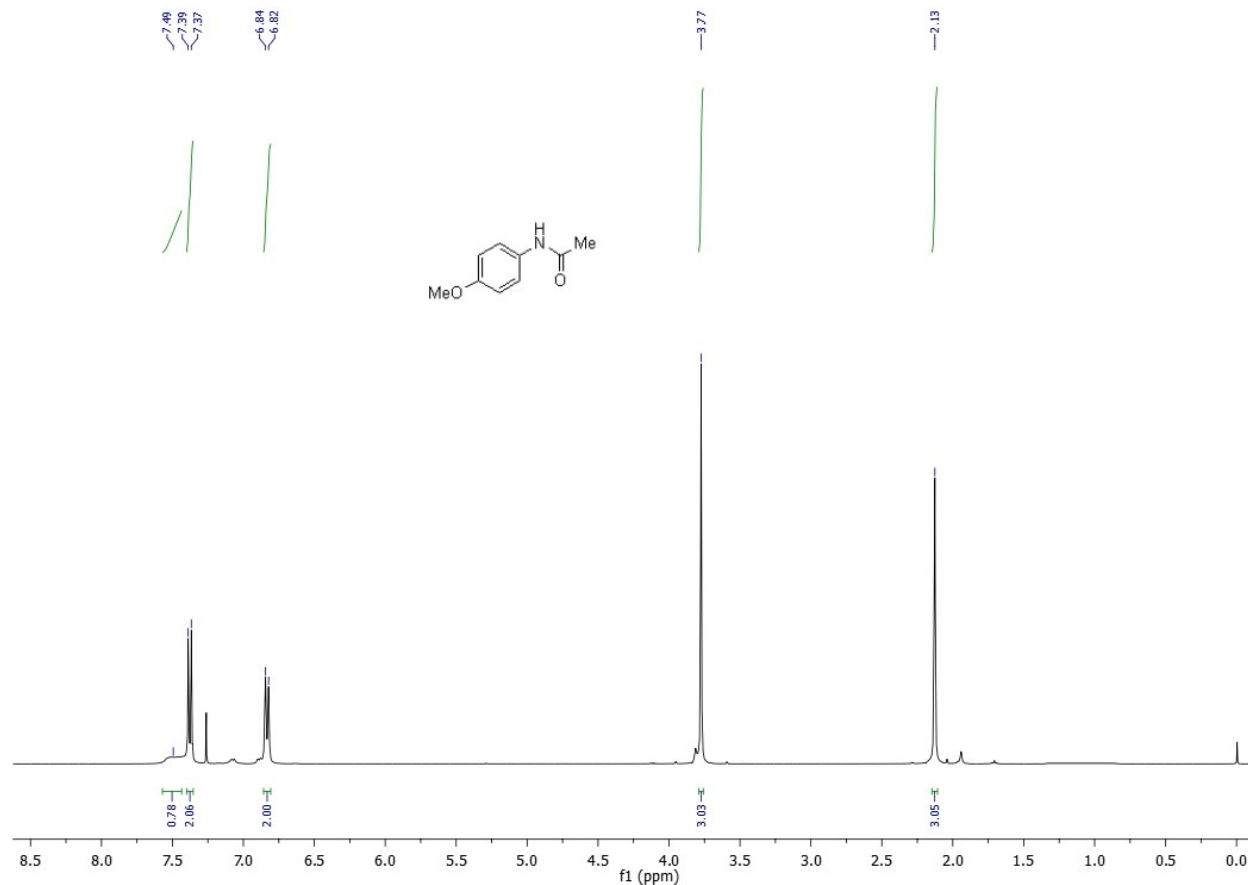

N-(4-

# Fluorophenylacetamide(3p): $^1\text{H}$ NMR & $^{13}\text{C}$ NMR

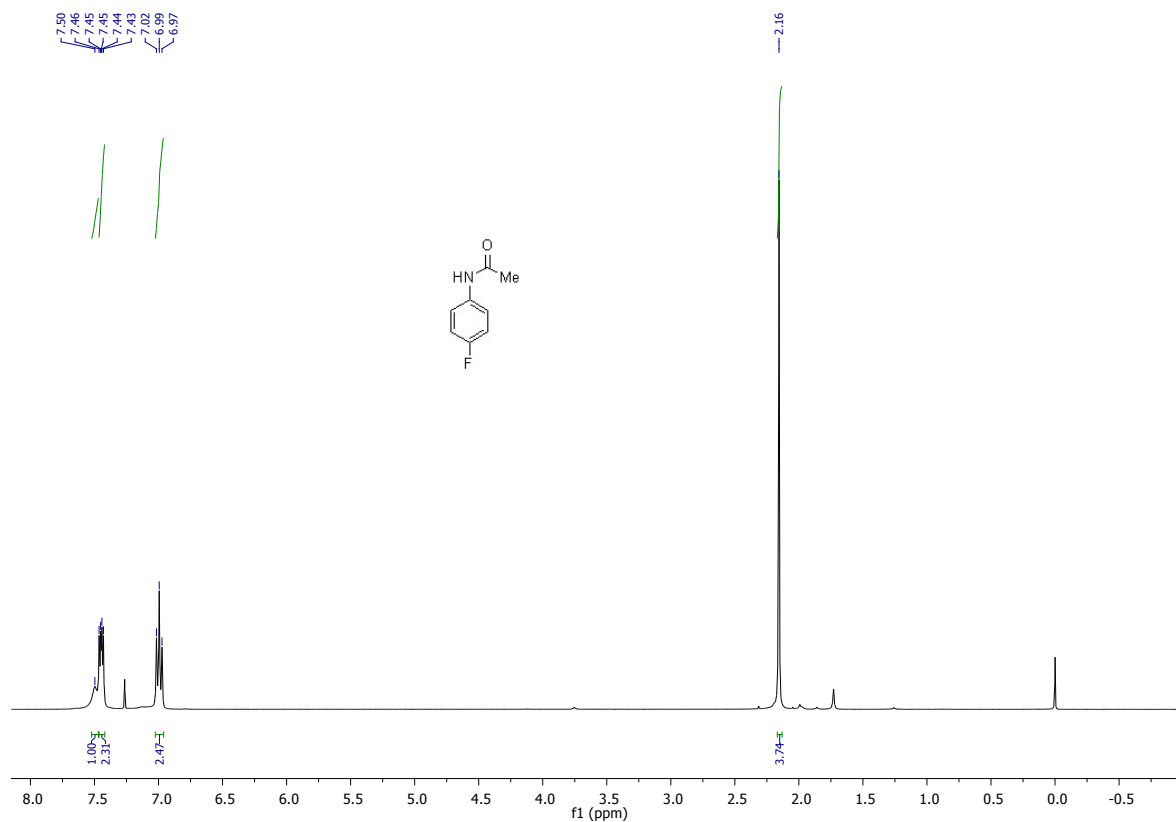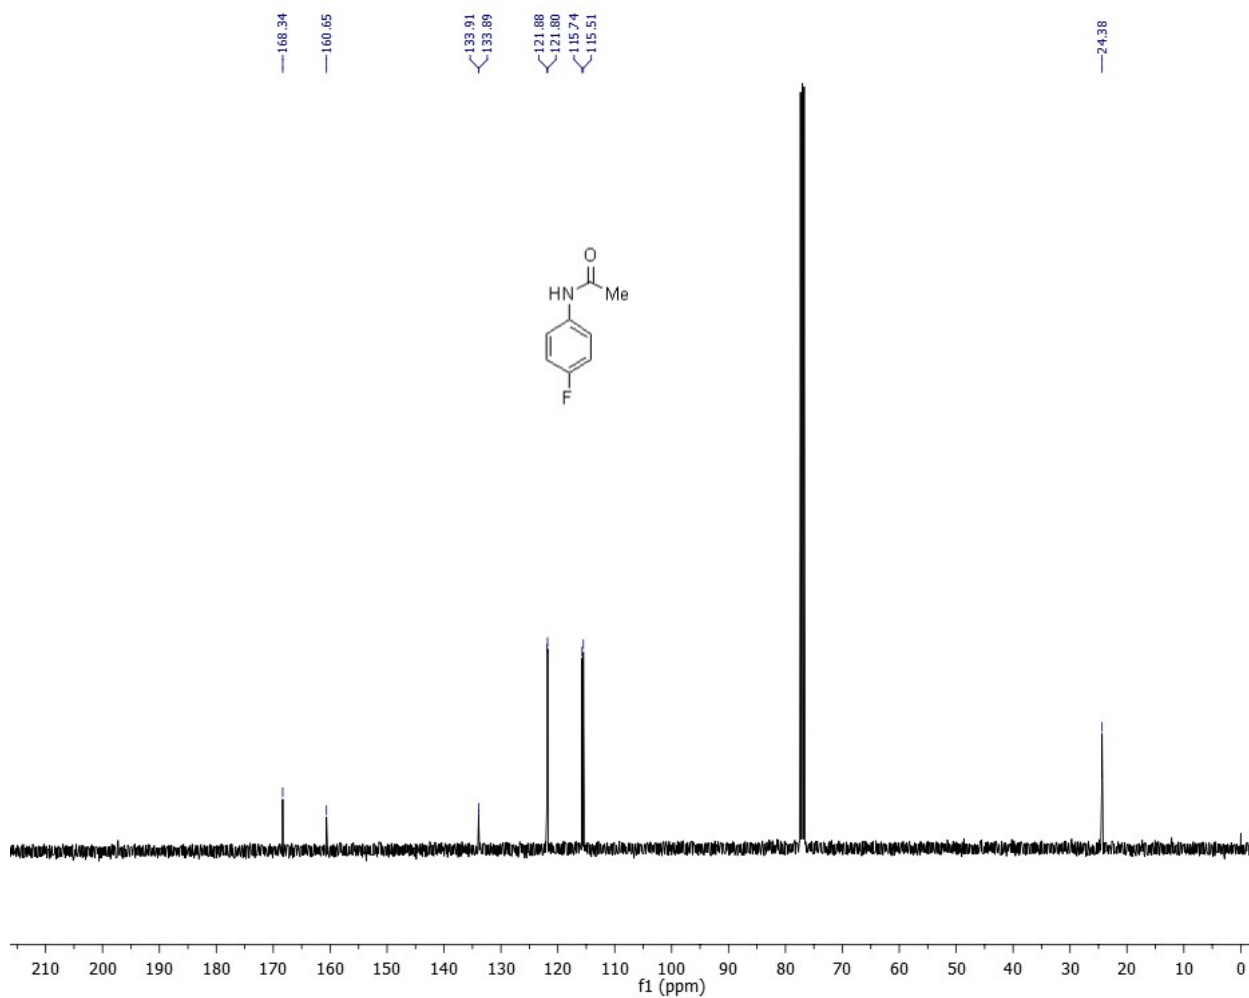

***N*-4-(Trifluoromethoxy)phenylacetamide(3q):  $^1\text{H}$  NMR &  $^{13}\text{C}$  NMR**

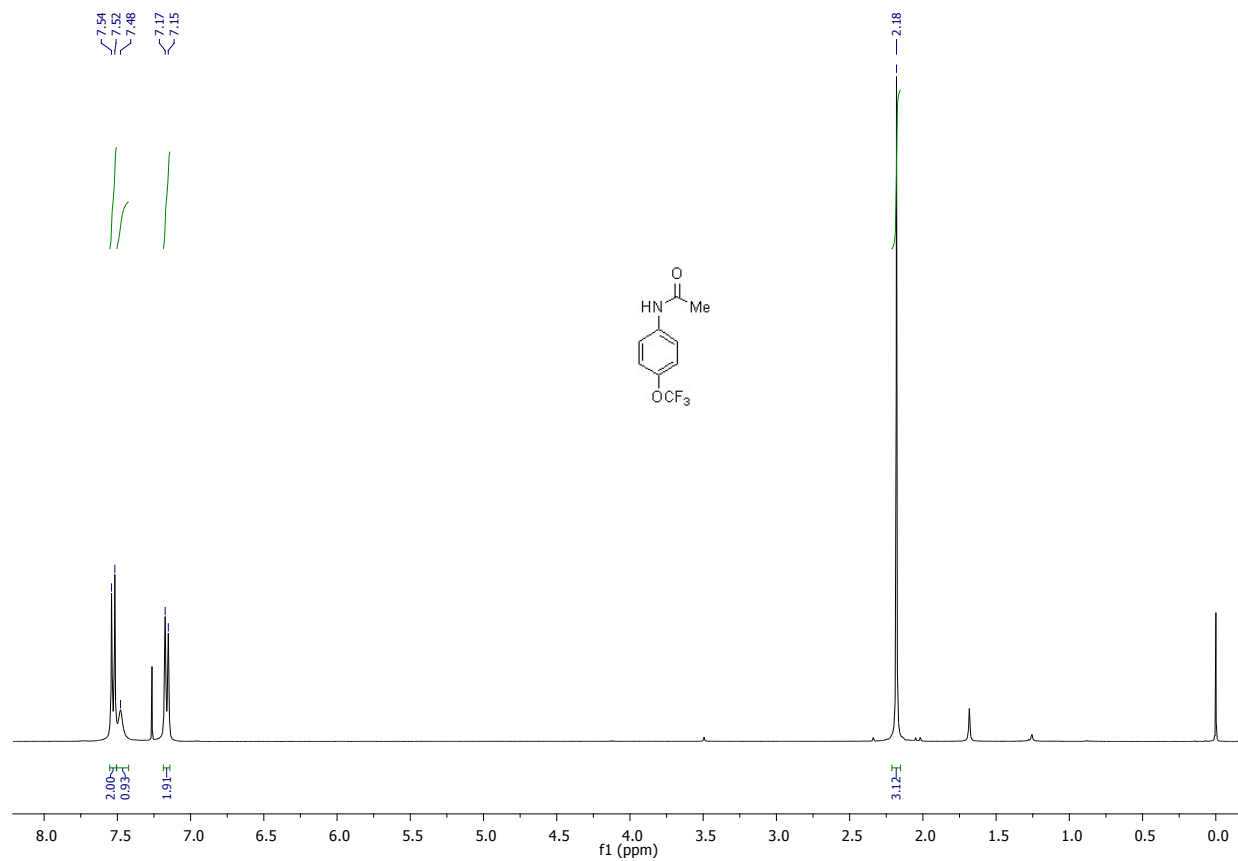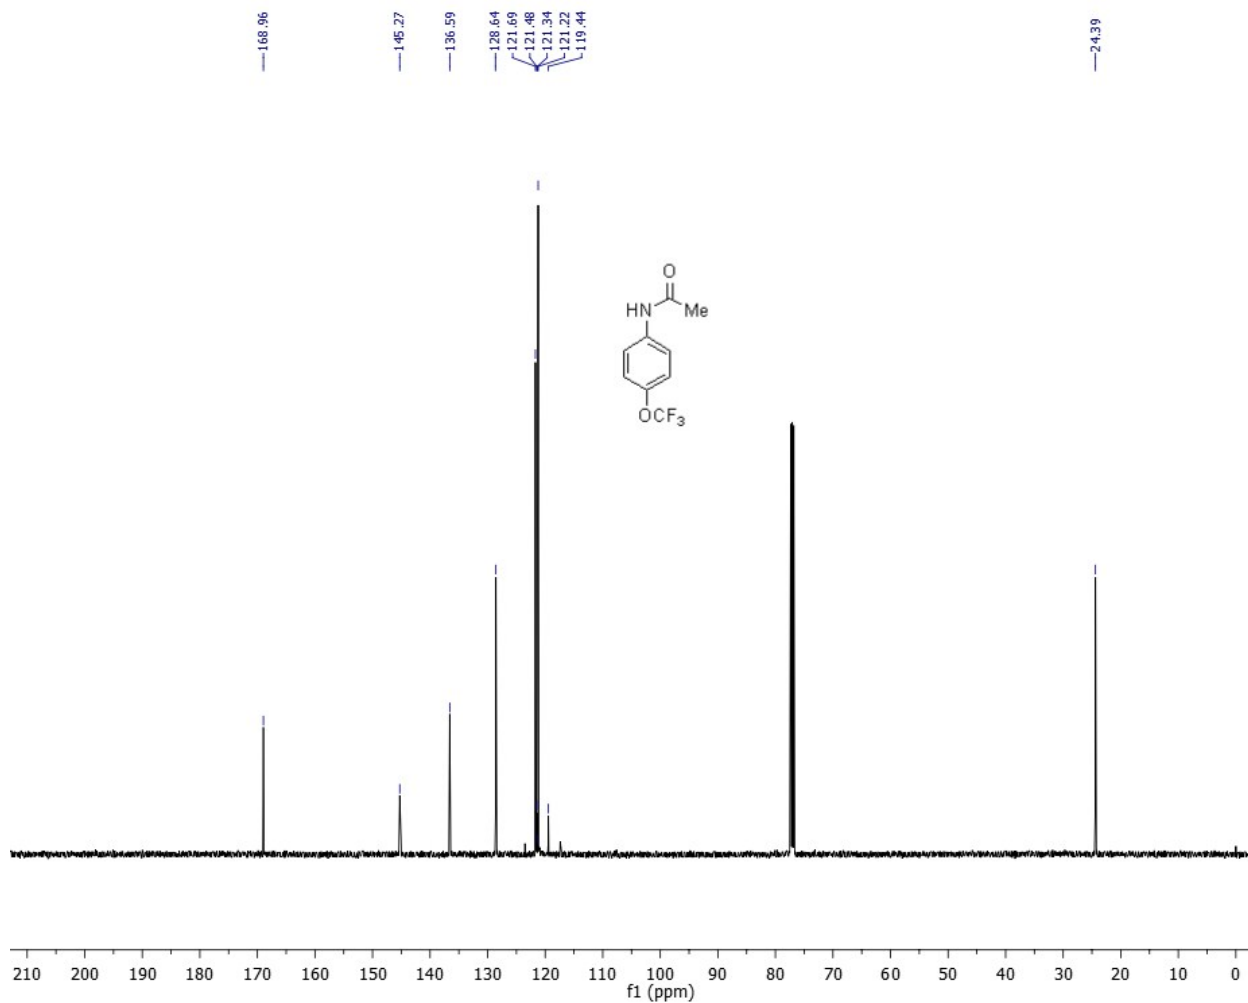

***N*-(4-Nitrophenyl)acetamide(3r): H<sup>1</sup> NMR & C<sup>13</sup> NMR**

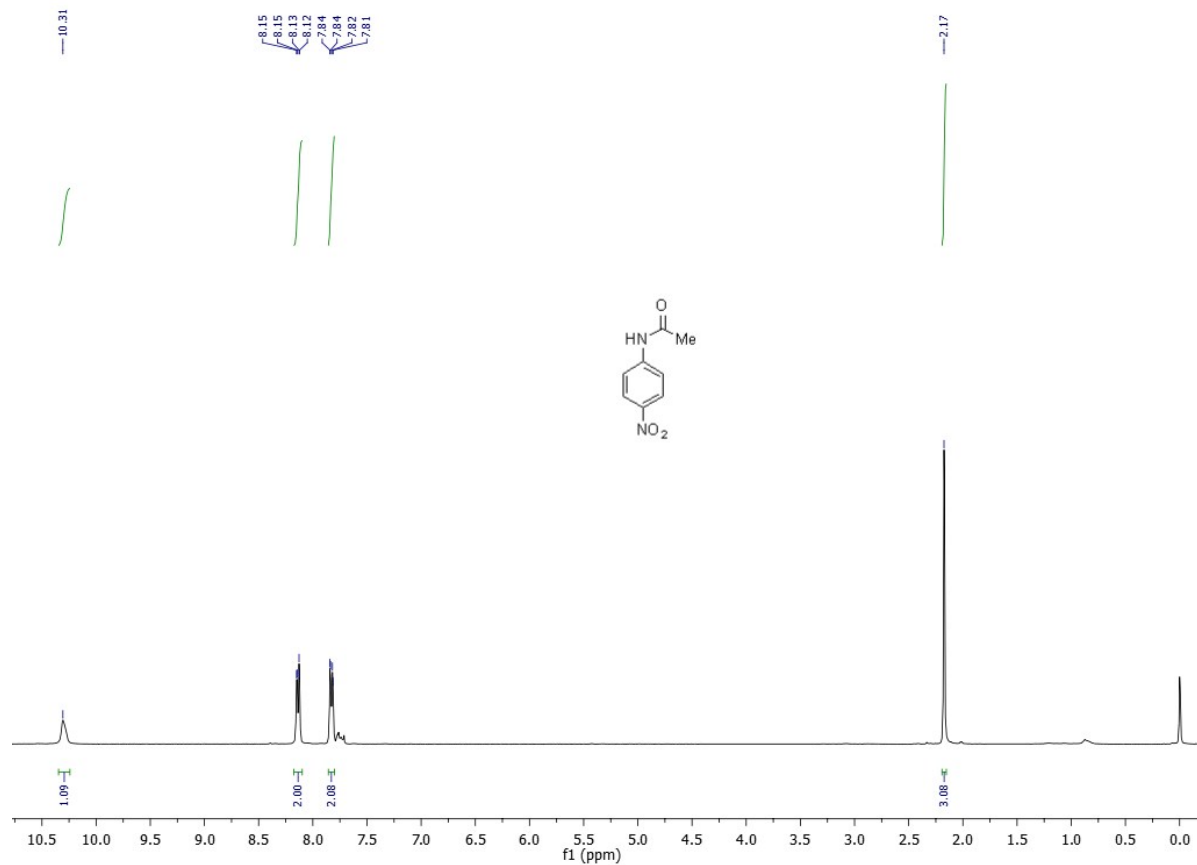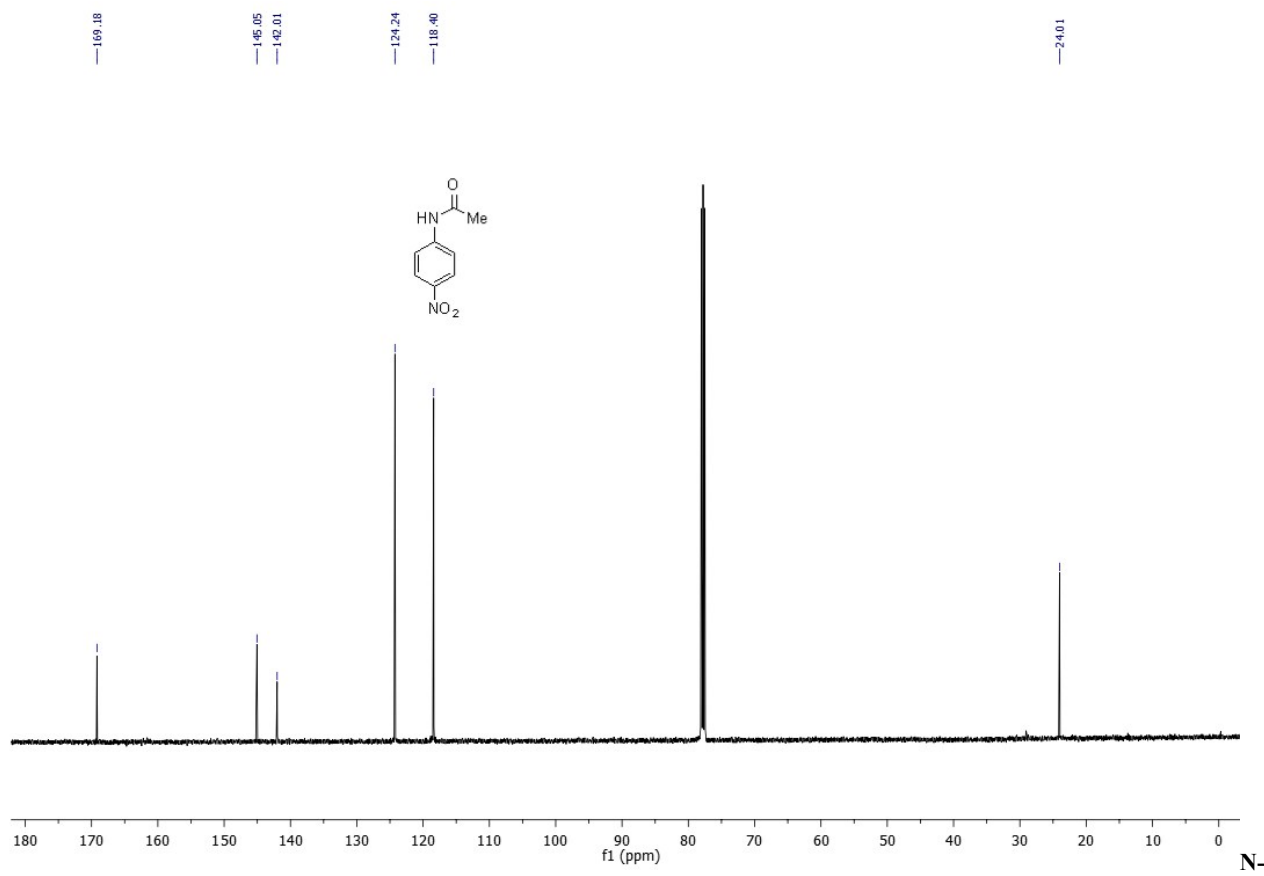

**(Pyridin-2-yl)acetamide(3s): H<sup>1</sup> NMR**

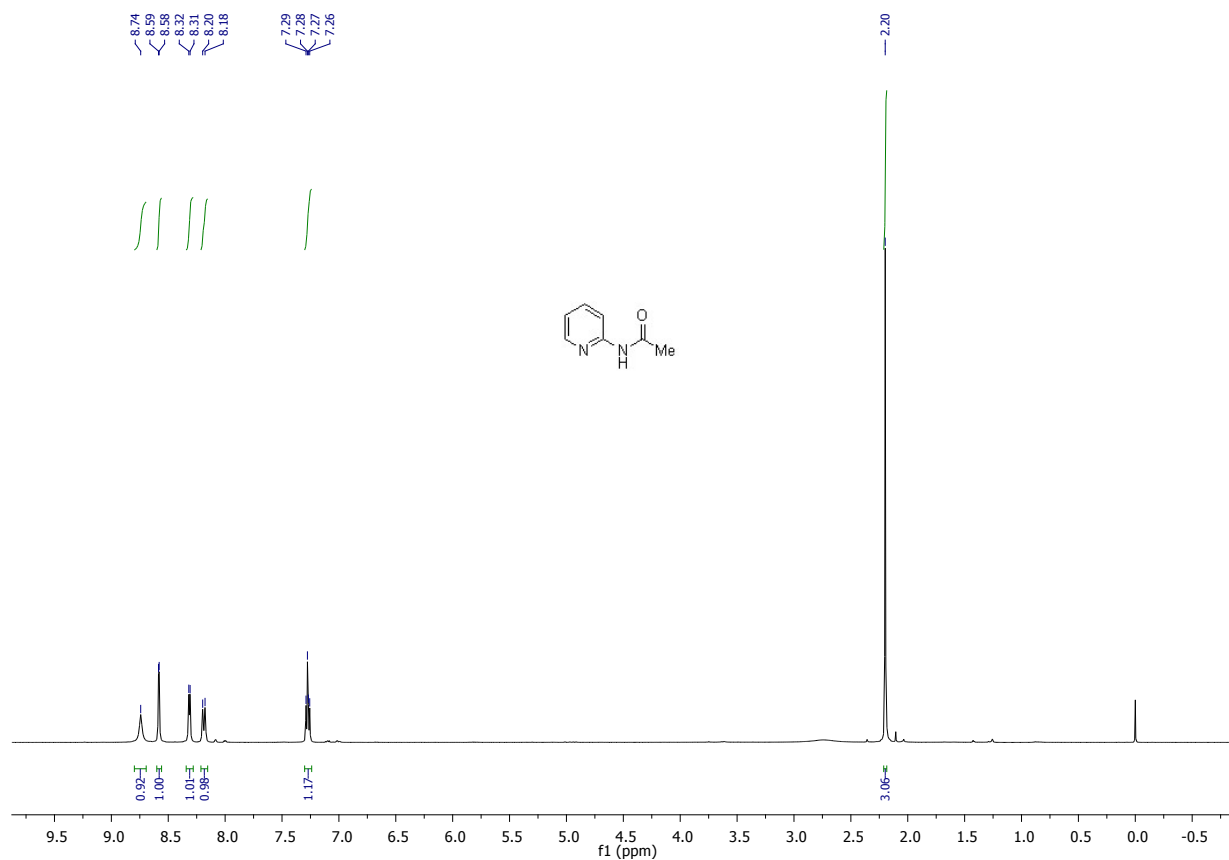

**N-(4-Bromopyridin-2-yl)acetamide(3t): H<sup>1</sup> NMR & C<sup>13</sup> NMR**

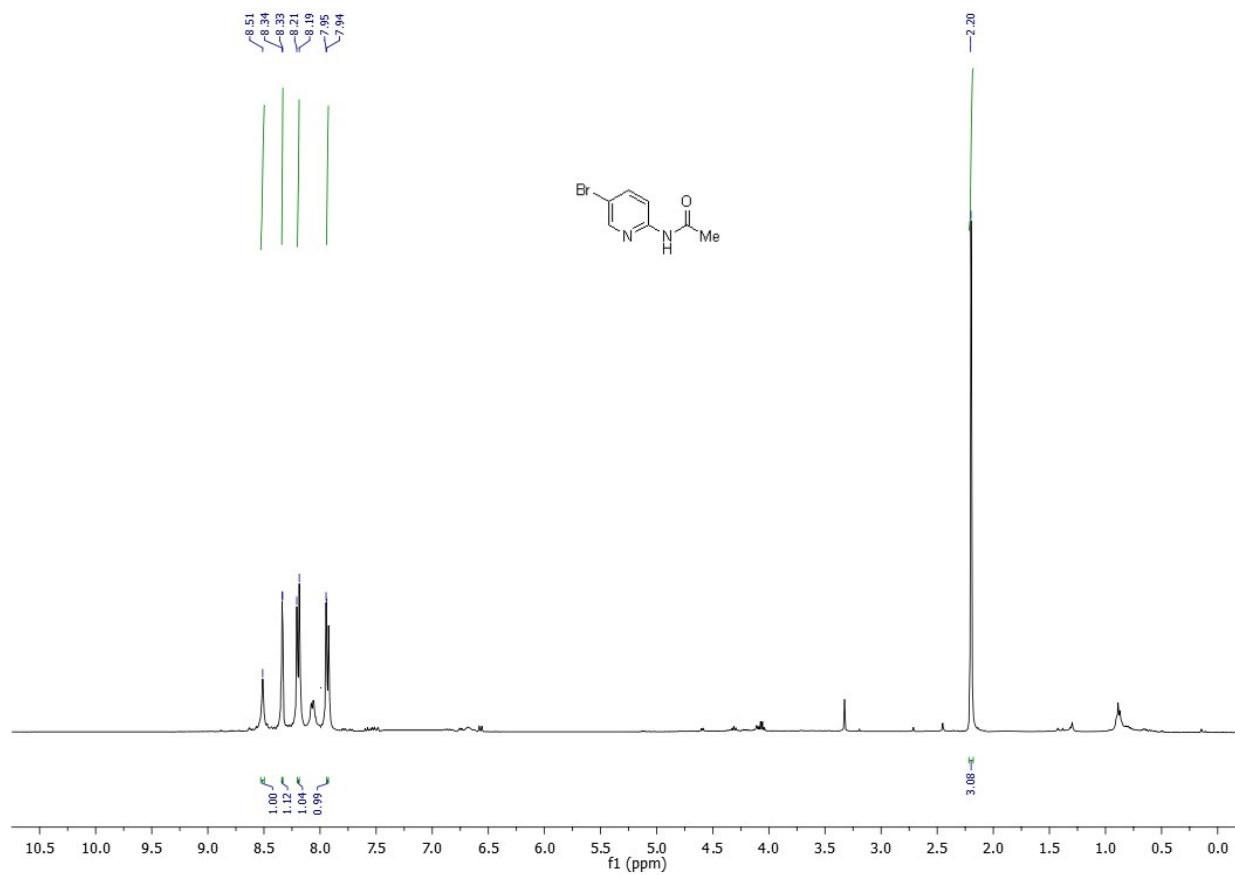

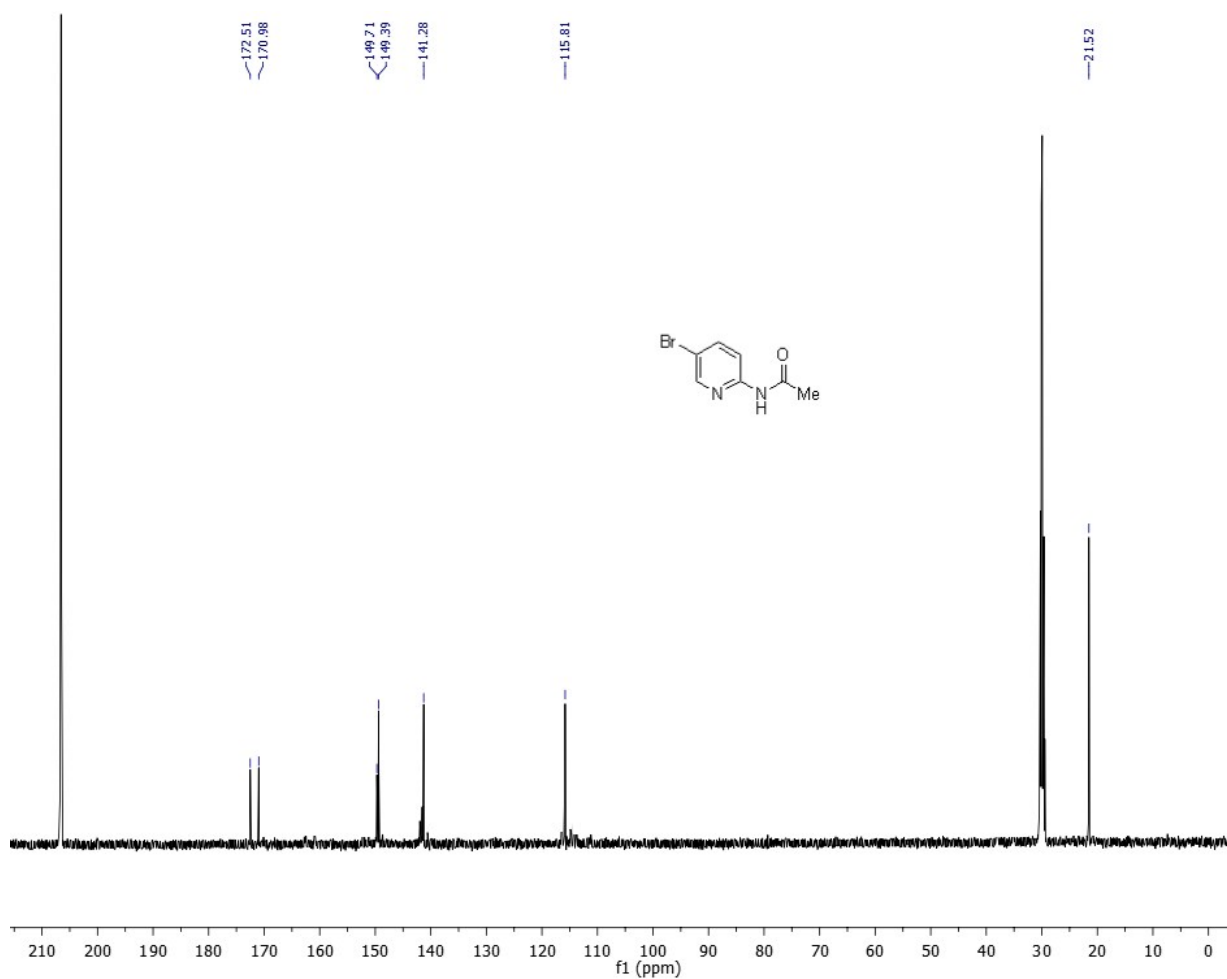

*N*-(Pyridin-3-yl)acetamide(3u):  $H^1$  NMR

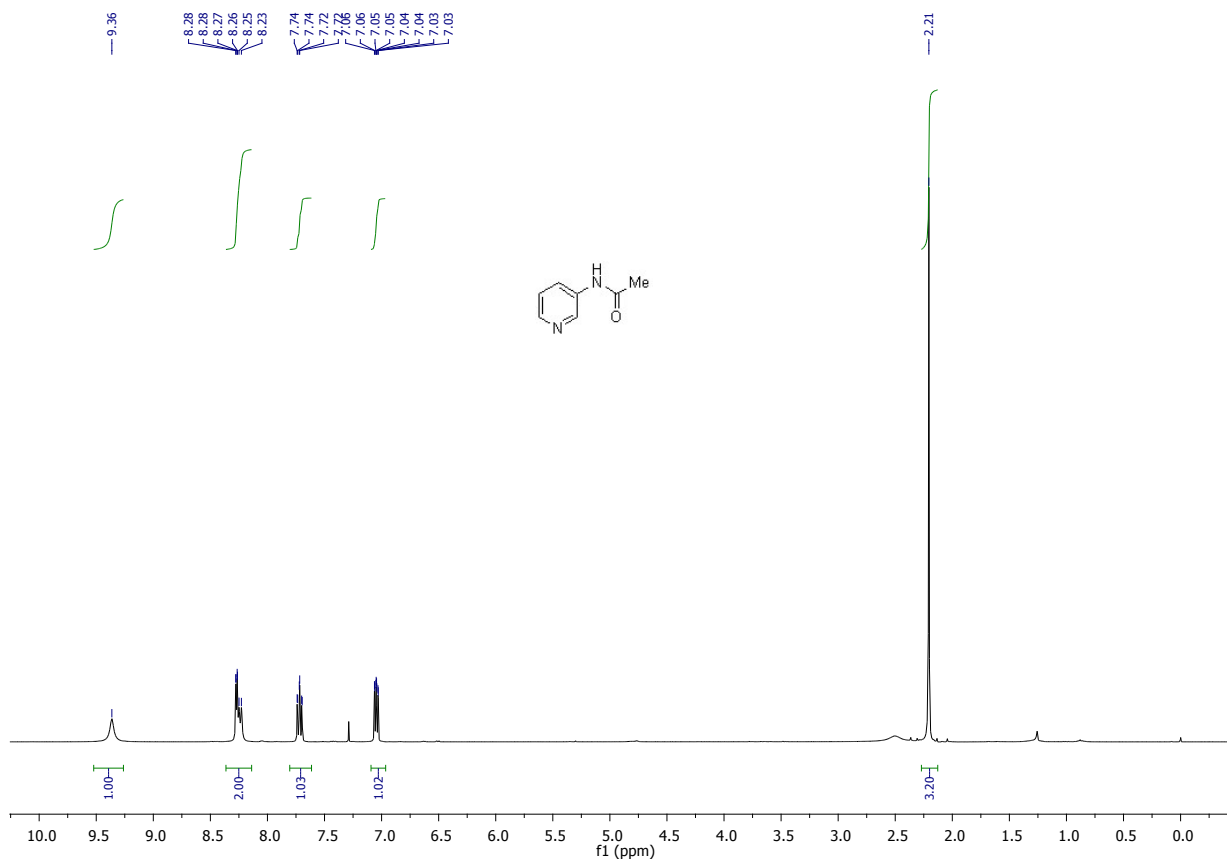



***N*-(2-(Diethylamino)ethyl)-4-nitrobenzamide:  $H^1$  NMR**

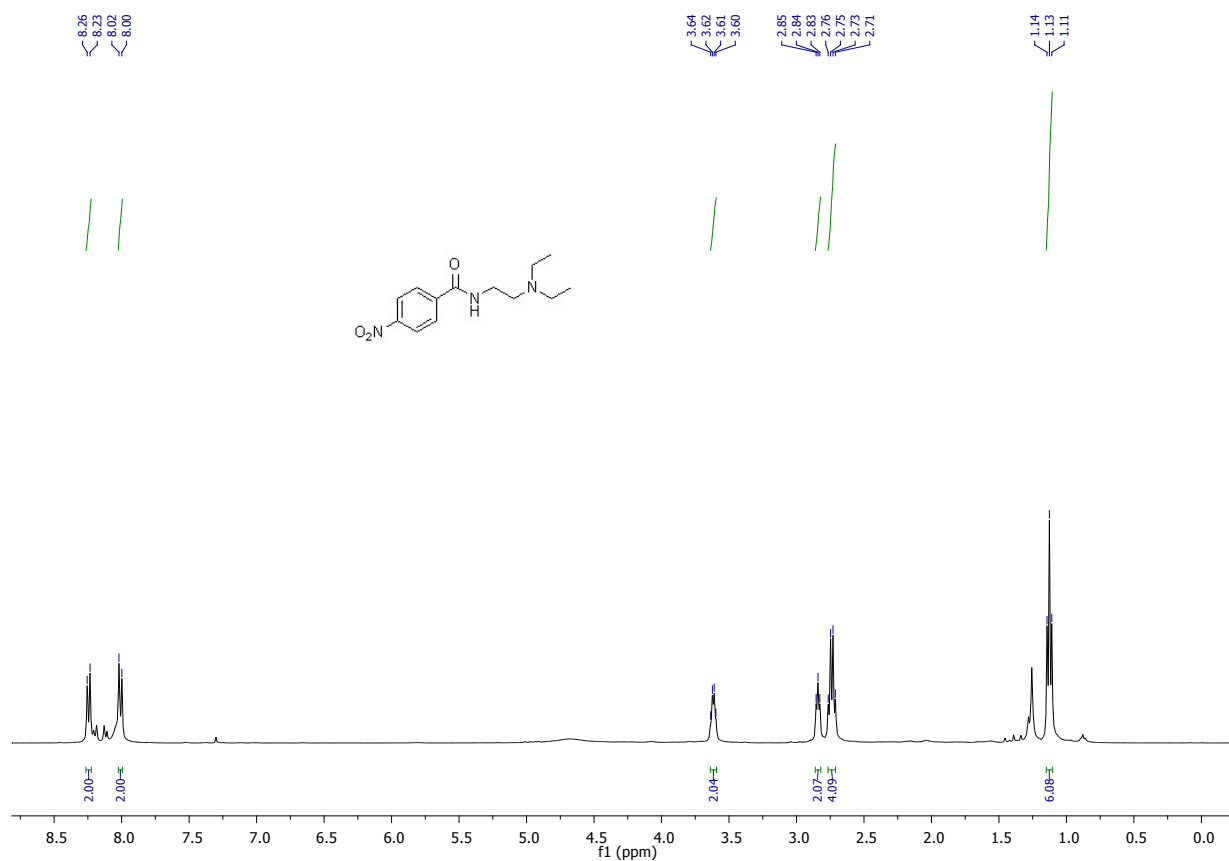

**Procainamide:  $H^1$  NMR &  $C^{13}$  NMR**

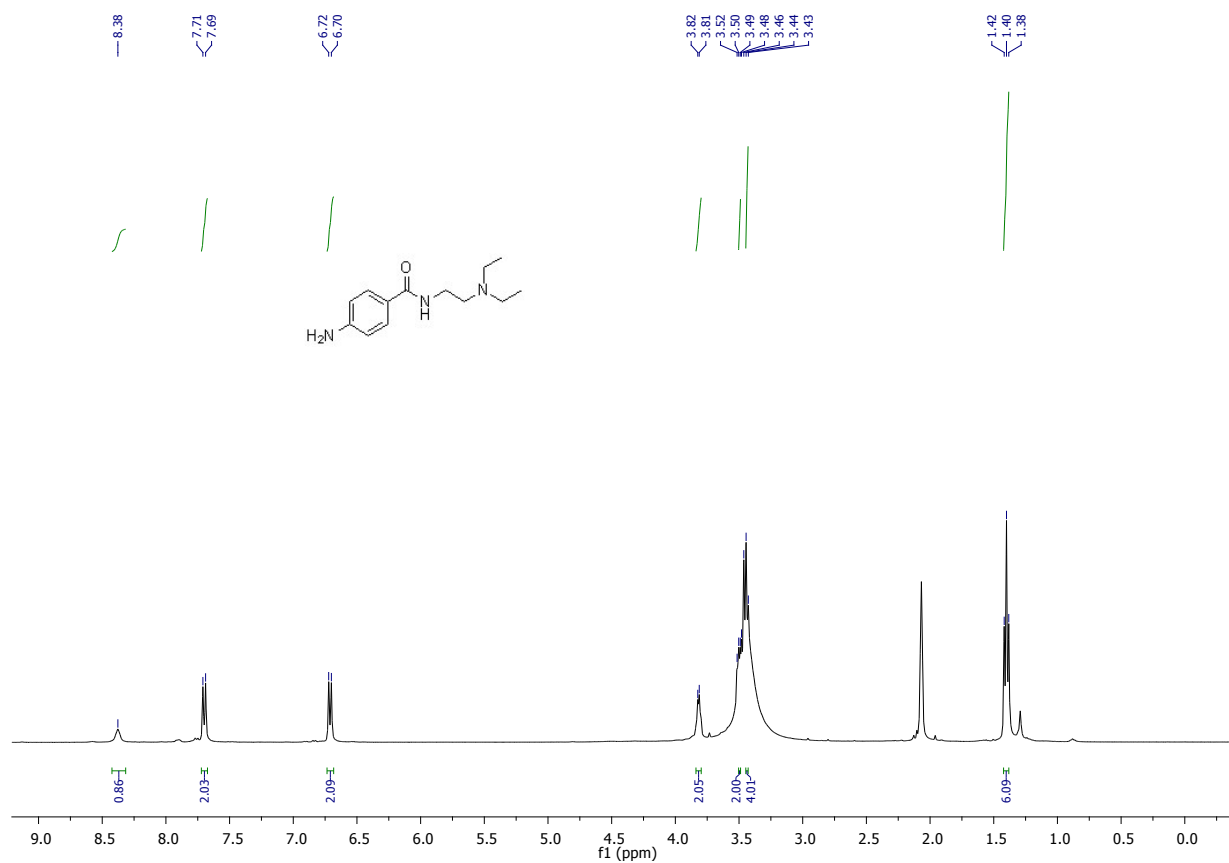

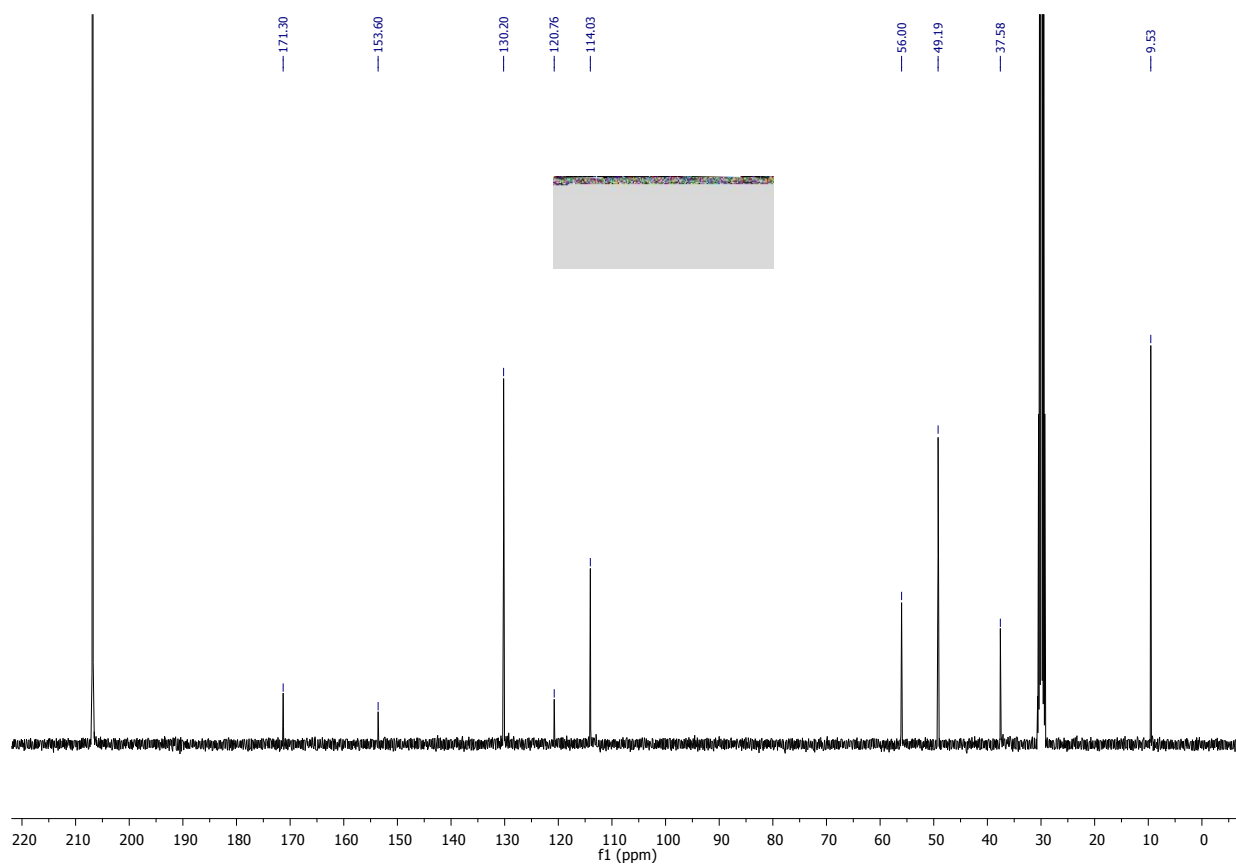

Supplement: c4ra16571c1.pdf [file c4ra16571c1.pdf]
